# Supplementary material for: Dearomatization of indoles via palladium-catalyzed carbonylation using Co2(CO)8 as the carbonyl source leading to carbonyl-containing spiroindolenines
Source: Royal Society of Chemistry journal article supplement (doi:10.1039/d3qo01014g), 2023-01-01

## *Supporting Information*

### Dearomatization of Indoles via Palladium-Catalyzed Carbonylation using $\text{Co}_2(\text{CO})_8$ as Carbonyl Source Leading to Carbonyl-Containing Spiroindolenines

Weiming Hu,<sup>\*,a</sup> Jiali Huang,<sup>a</sup> Wenting Wu,<sup>a</sup> Wenting Guo,<sup>a</sup> Gang Gao,<sup>c</sup> Xiaoqin Pei,<sup>a</sup> Huiyan Wang,<sup>a</sup> Chuanzhou  
Tao,<sup>a</sup> and Huayou Hu,<sup>b</sup>

<sup>a</sup> Jiangsu Key Laboratory of Function Control Technology for Advanced Materials, School of Environmental and Chemical Engineering,  
Jiangsu Ocean University, Lianyungang 222005, Jiangsu, China;

<sup>b</sup> School of Chemistry and Chemical Engineering, Huaiyin Normal University, Huaian 223300, China;

<sup>c</sup> Jiangsu Province Lianyungang Flood Control and Motorized Rescue Team, Lianyungang 222000, Jiangsu, China;

#### **Table of Contents**

|                                         |     |
|-----------------------------------------|-----|
| <b>I. General Information</b> .....     | S2  |
| <b>II. Synthesis and Reaction</b> ..... | S3  |
| <b>III. Characterization Data</b> ..... | S9  |
| <b>IV. References</b> .....             | S52 |
| <b>V. Copies of NMR Spectra</b> .....   | S53 |

## I. General Information

Unless otherwise noted, all chemicals were purchased from commercial suppliers and used without further purification.  $^1\text{H}$  NMR,  $^{13}\text{C}$  NMR spectra were recorded at ambient temperature on a 500 MHz (125 MHz for  $^{13}\text{C}$ ) NMR spectrometer. NMR experiments are reported in  $\delta$  units, parts per million (ppm), and were referenced to  $\text{CDCl}_3$  ( $\delta$  7.26 or 77.0 ppm) as the internal standard. The coupling constants  $J$  are given in Hz. IR spectra were recorded on a spectrometer using KBr discs. Column chromatography was performed using EM Silica gel 60 (300-400 mesh). High-resolution mass spectra (HRMS) were obtained using a Bruker micro TOF II focus spectrometer (ESI). All melting points were uncorrected.

## II. Synthesis and Reaction

### Preparation of the substrates

#### General procedures for the synthesis of **1**

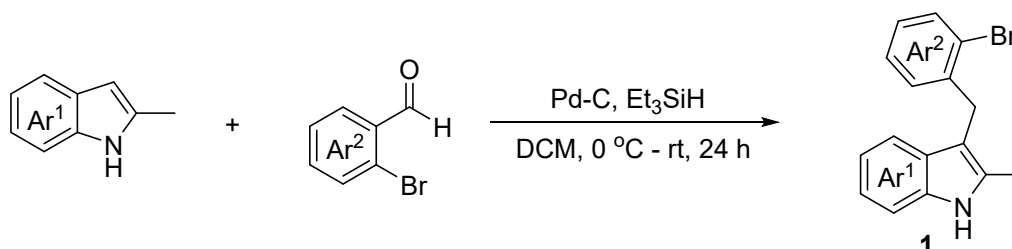

Following a modified procedure,<sup>1</sup> in an oven dried 50 mL Schlenk tube, 10% Pd-C (75 mg, 10 mol%), TFA (1.15 mL, 15.0 mmol, 1.50 equiv.) and  $\text{Et}_3\text{SiH}$  (2.2 equiv.) were added to DCM (50 mL) under argon at  $0\text{ }^\circ\text{C}$  and the mixture was stirred for 10 min. Then a solution of an indole derivative (10.0 mmol, 1.0 equiv.) and the corresponding 2-bromobenzaldehyde derivative (11.0 mmol, 1.10 equiv.) in DCM (50 mL) was added dropwise to the reaction mixture. After stirring for 4 hours at  $0\text{ }^\circ\text{C}$ , the reaction mixture was allowed to warm to room temperature and the stirring was continued for additional 20 hours. Then the reaction mixture was filtered through celite and concentrated in a rotary evaporator. The solvent was evaporated, and the crude mixture was purified by flash column chromatography on silica gel (hexane/ $\text{EtOAc}$ , 60:1-30:1) to obtain products **1** (**1a-1r**).

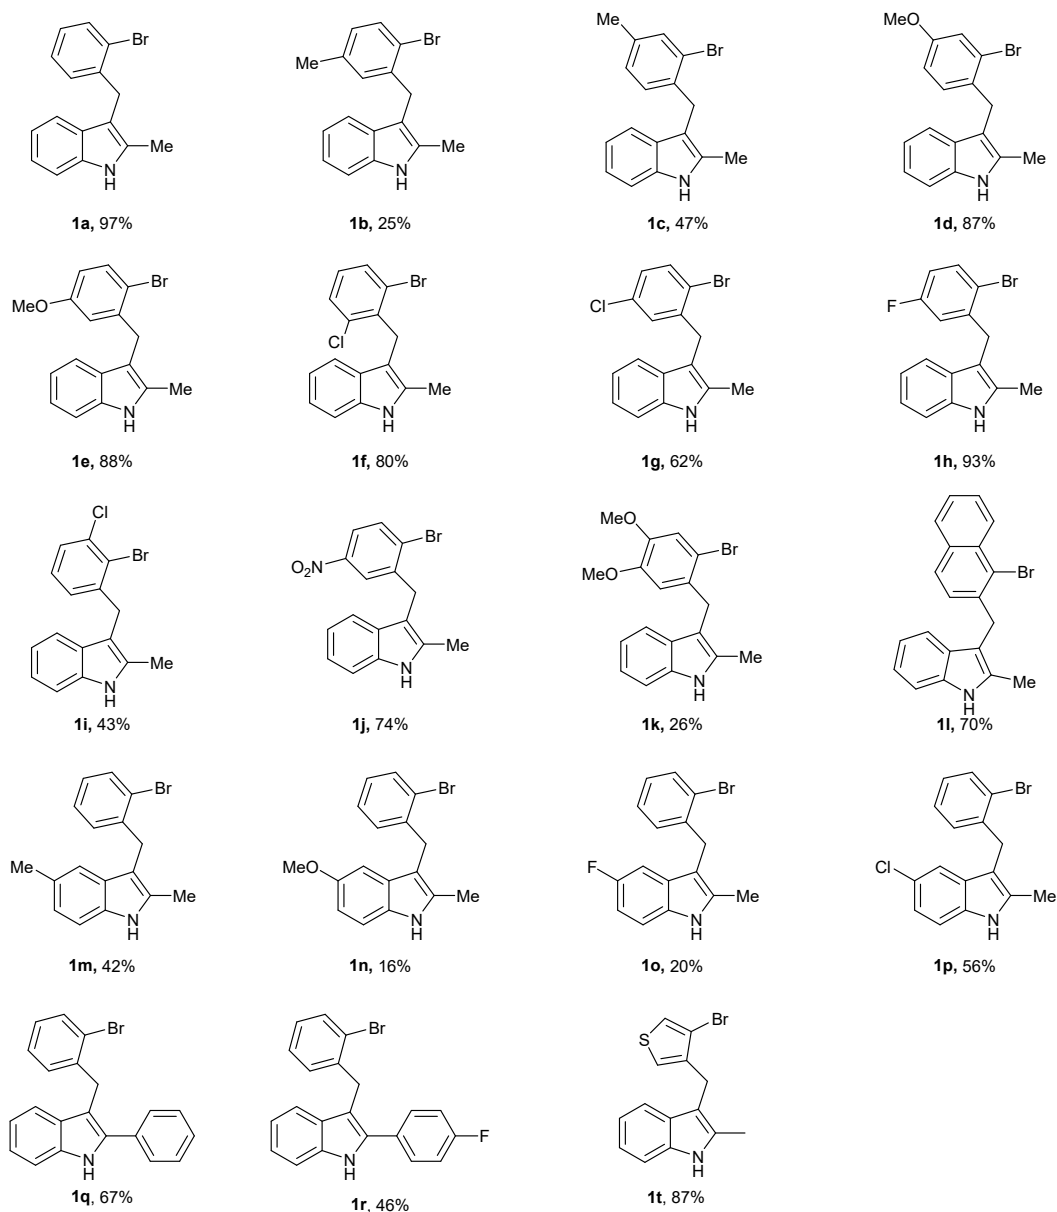

### General procedures for the synthesis of **1s**

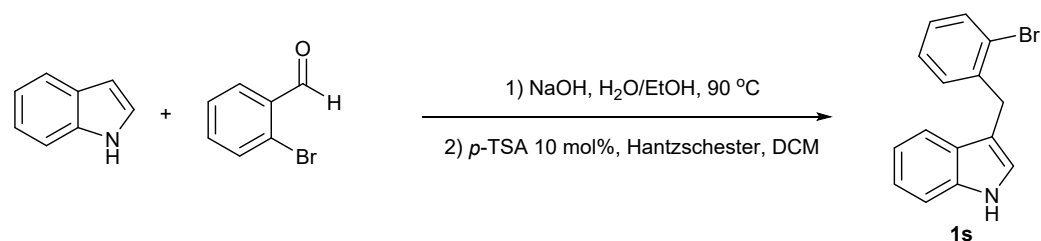

According to the literature procedure,<sup>2</sup> in a 50 mL Schlenk tube, indole (1.0 mmol), 2-bromobenzaldehyde (1.2 mmol) and NaOH (1.0 mmol, 40 mg) were added to EtOH/H<sub>2</sub>O (v<sub>1</sub>:v<sub>2</sub>, 1:1, 2.0 mL), and the mixture was stirred at 90 °C for 1 hour. Then the reaction mixture was filtered through celite and concentrated in a rotary

evaporator. The solvent was evaporated, the crude product (2-bromophenyl)(1*H*-indol-3-yl)methanol was used for the next step without purification.

According to the literature procedure,<sup>3</sup> to a stirred solution of the crude product (2-bromophenyl) (1*H*-indol-3-yl) methanol (241.0 mg, 0.8 mmol) in DCM (3.0 mL), Hantzsch esters (253.3 mg, 1.0 mmol) was added. Then *p*-toluenesulfonic acid monohydrate (6.9 mg, 0.04 mmol) was added to the mixture and the resultant was stirred for 4 hours. After the reaction was completed by TLC, the solvent was removed in vacuum. The residue was purified by flash column chromatography (petroleum ether/EtOAc = 5:1) on silica gel to afford 3-(2-bromobenzyl)-1*H*-indole (**1s**) as a yellowish oil (212.8 mg, 93%).

### General procedure for the synthesis of **2**

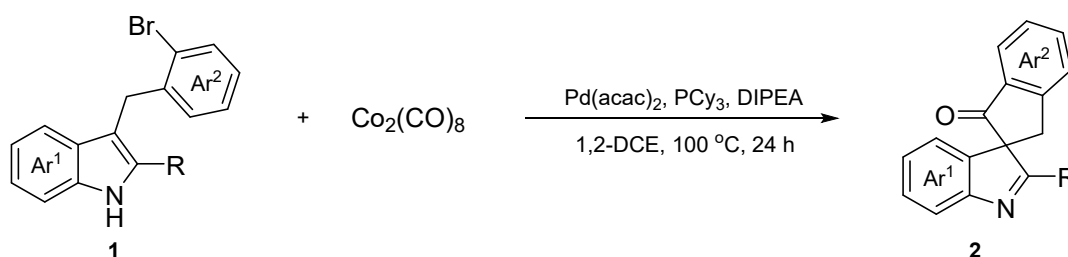

Under air, a 20 mL of Schlenk tube equipped with a stir bar was charged with indole derivative **1** (0.10 mmol, 1.0 equiv.), Co<sub>2</sub>(CO)<sub>8</sub> (0.1 mmol, 1.0 equiv.), Pd(acac)<sub>2</sub> (10 mol%), PCy<sub>3</sub> (20 mol%), DIPEA (2.0 equiv.) and toluene (1.0 mL). The tube was sealed with a Teflon lined cap. The reaction mixture was stirred at 100 °C for 24 h in oil bath. After the completion of the reaction, 5.0 mL of saturated brines was added to the mixture, and extracted with ethyl acetate (5 mL × 3). The combined organic extracts were dried over anhydrous Na<sub>2</sub>SO<sub>4</sub>. Subsequently, the solvent was filtered and evaporated under reduced pressure, and the residue was purified by flash column chromatography on silica gel with petroleum ether-EtOAc (PE/EA, v/v, 3:1) as the eluent to give the desired product **2**.

### General Procedure for the 2.0 mmol scale preparation of **2a**

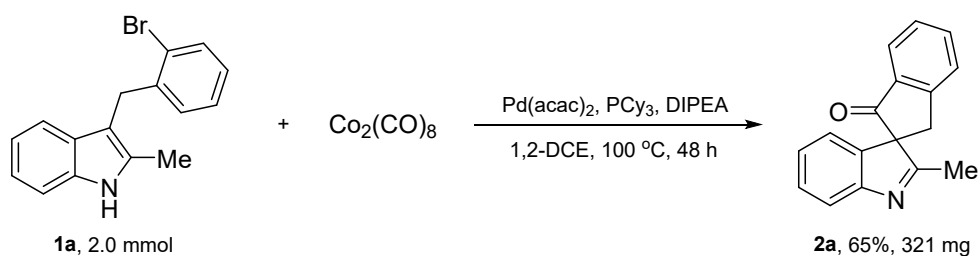

Under air, a 100 mL of round-bottom flask equipped with a stir bar was charged with indole derivative **1a** (2.0 mmol, 1.0 equiv.),  $\text{Co}_2(\text{CO})_8$  (2.0 mmol),  $\text{Pd}(\text{acac})_2$  (10 mol%),  $\text{PCy}_3$  (20 mol%), DIPEA (2.0 equiv.) and toluene (20 mL). The tube was sealed with a Teflon lined cap. The reaction mixture was stirred at 100 °C for 48 h in oil bath. After the completion of the reaction, 20 mL of saturated brines was added to the mixture, and extracted with ethyl acetate (15 mL  $\times$  3). The combined organic extracts were dried over anhydrous  $\text{Na}_2\text{SO}_4$ . Subsequently, the solvent was filtered and evaporated under reduced pressure, and the residue was purified by flash column chromatography on silica gel with petroleum ether-EtOAc (PE/EA, v/v, 3:1) gave **2a** in 65% yield as a yellowish solid (321 mg).

#### General procedure for preparation of thione **3**<sup>4</sup>

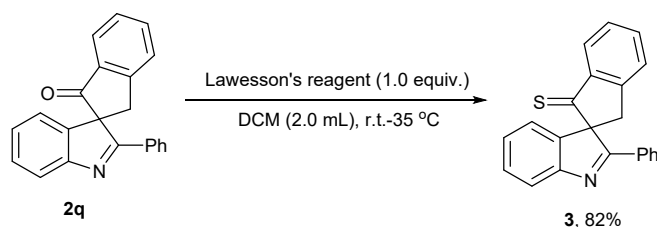

To a solution of compound **2q** (0.2 mmol, 1.0 equiv.) in dry DCM (2.0 mL) was added Lawesson's reagent (80.9 mg, 0.2 mmol, 1.0 equiv.) under argon and the mixture was stirred at 35 °C until complete conversion was observed by TLC. Then the solvent was removed in vacuo, the residue was purified by flash column chromatography on silica gel (PE/EA = 6:1) to afford the desired product **3** as a yellowish oil (53.3 mg, 82%).

#### General procedure for Rh-catalyzed C(sp<sup>2</sup>)-H bromination of **2q**

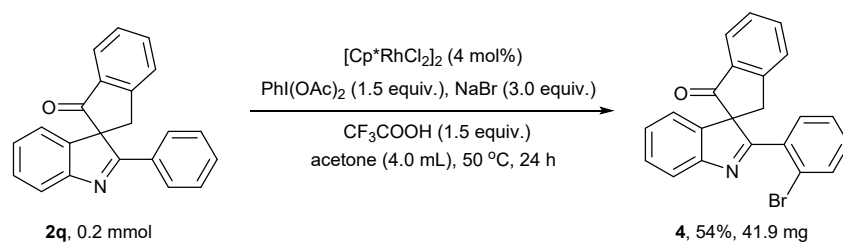

To a solution of compound **2t** (61.8 mg, 0.2 mmol, 1.0 equiv.) in acetone (4.0 mL) was added  $[\text{Cp}^*\text{RhCl}_2]_2$  (4.0 mol%, 5.0 mg),  $\text{PhI(OAc)}_2$  (96.6 mg, 0.3 mmol, 1.5 equiv.),  $\text{NaBr}$  (61.4 mg, 0.6 mmol, 3.0 equiv.) and  $\text{CF}_3\text{COOH}$  (1.5 equiv.). The reaction mixture was then stirred at 50 °C for 24 h. Then,  $\text{EtOAc}$  (10 mL) and  $\text{H}_2\text{O}$  (10 mL) were added, the organic layer was dried over  $\text{Na}_2\text{SO}_4$ , and the solvent was removed in vacuo. The residue was purified by flash chromatography (PE/EA = 8:1) to afford the bromination product **4** as a white solid (41.9 mg, 54%).

#### General procedure for the preparation of hydrazone **5**<sup>5</sup>

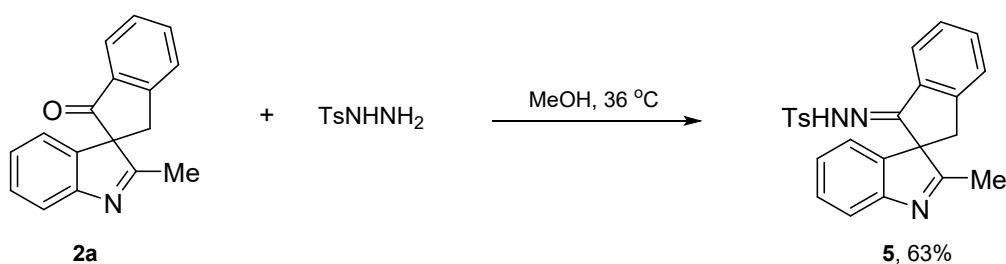

To a solution of tosylhydrazide (1.0 equiv.) in MeOH (0.5 M) was added **2a** (49.4 mg, 0.2 mmol, 1.0 equiv.). The reaction mixture was stirred at 36 °C until complete conversion was observed by TLC. Then the solvent was removed in vacuo, the residue was purified by flash column chromatography on silica gel (PE/EA = 4:1) to afford the desired product **5** as a yellowish oil (52.3 mg, 63%).

#### General procedure for reduction of **2a** to spiroindoline **6**

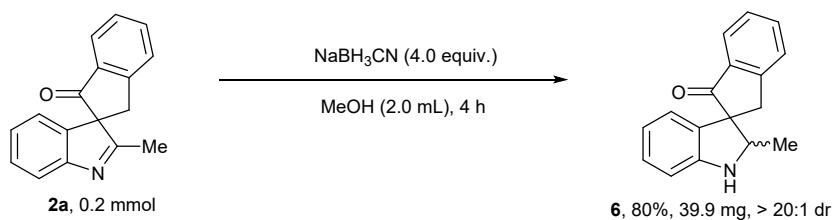

Under argon, to a solution of **2a** (49.4 mg, 0.2 mmol, 1.0 equiv.) in MeOH (2.0 mL)

was added NaBH<sub>3</sub>CN (50.0 mg, 0.8 mmol, 4.0 equiv.). The reaction mixture was stirred at 40 °C until complete conversion was observed by TLC (4 h). 10 mL of saturated brines was added to the mixture, and extracted with ethyl acetate (5 mL × 3). The combined organic extracts were dried over anhydrous Na<sub>2</sub>SO<sub>4</sub>. Subsequently, the solvent was filtered and evaporated under reduced pressure, and the residue was purified by flash column chromatography on silica gel with petroleum ether-EtOAc (PE/EA, v/v, 4:1) gave **6** in 80% yield as a yellowish oil (39.9 mg).

### **III. Characterization Data**



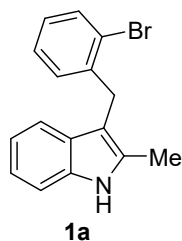

**3-(2-bromobenzyl)-2-methyl-1*H*-indole (1a)<sup>1,3</sup>**

Flash column chromatography on a silica gel (PE/EA, v/v, 60:1) gives **1a** (880 mg, 97% yield) as a yellowish solid: m.p. 76-77 °C; <sup>1</sup>H NMR (500 MHz, CDCl<sub>3</sub>) δ 7.80 (s, 1H), 7.61 (dd, *J*<sub>1</sub> = 7.8 Hz, *J*<sub>2</sub> = 1.5 Hz, 1H), 7.37 (d, *J* = 7.9 Hz, 1H), 7.31 (d, *J* = 8.1 Hz, 1H), 7.18–7.14 (m, 1H), 7.13–7.09 (m, 1H), 7.07 (d, *J* = 7.3 Hz, 1H), 7.06 – 7.03 (m, 1H), 6.98 (dd, *J*<sub>1</sub> = 7.5 Hz, *J*<sub>2</sub> = 1.9 Hz, 1H), 4.17 (s, 2H), 2.36 (s, 3H). <sup>13</sup>C {<sup>1</sup>H} NMR (125 MHz, CDCl<sub>3</sub>) δ 140.3, 135.4, 132.5, 132.4, 130.0, 129.0, 127.5, 127.3, 124.6, 121.2, 119.4, 118.5, 110.2, 109.0, 30.5, 11.9. IR (cm<sup>-1</sup>): 3420(N-H), 3180(Ar-H), 1616(Ar C=C), 1402(C-H), 1087(Ar-Br), 933(C-C), 759(C-C), 741(C-C). HRMS(ESI) *m/z*: [M+H]<sup>+</sup> Calcd. for C<sub>16</sub>H<sub>15</sub>BrN<sup>+</sup> 300.0382, Found 300.0391.

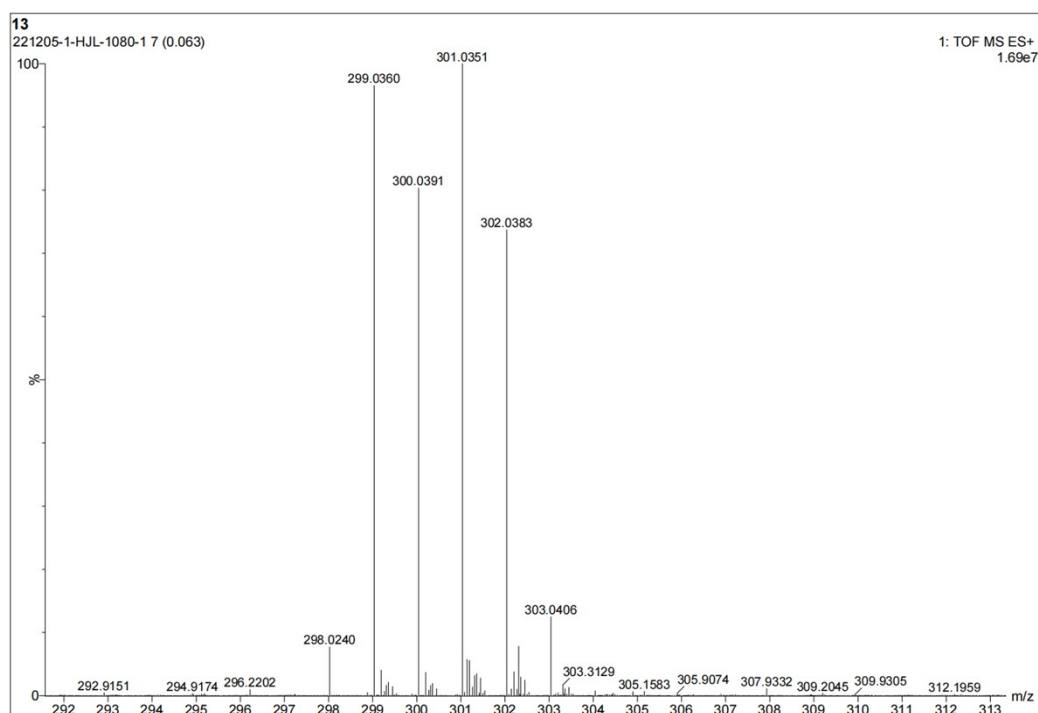

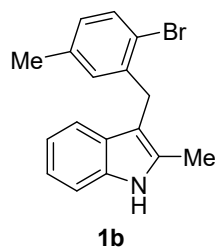

### 3-(2-bromo-5-methylbenzyl)-2-methyl-1*H*-indole (**1b**)

Flash column chromatography on a silica gel (PE/EA, v/v, 30:1) gives **1b** (309 mg, 25% yield) as a yellow oil;  $^1\text{H}$  NMR (500 MHz,  $\text{CDCl}_3$ )  $\delta$  7.83 (s, 1H), 7.46 (d,  $J = 8.1$  Hz, 1H), 7.37 (d,  $J_1 = 7.9$  Hz, 1H), 7.31 (d,  $J_1 = 8.0$  Hz, 1H), 7.14 (td,  $J_1 = 8.1$  Hz,  $J_2 = 7.6$ ,  $J_3 = 1.2$  Hz, 1H), 7.06–7.03 (m, 1H), 6.85 (d,  $J_1 = 8.1$  Hz, 1H), 6.79 (s, 1H), 4.12 (s, 2H), 2.36 (s, 3H), 2.13 (s, 3H).  $^{13}\text{C}\{^1\text{H}\}$  NMR (125 MHz,  $\text{CDCl}_3$ )  $\delta$  139.9, 137.2, 135.4, 132.3, 132.2, 130.7, 129.0, 128.3, 121.2, 121.1, 119.4, 118.5, 110.2, 109.2, 30.3, 21.0, 11.9. IR ( $\text{cm}^{-1}$ ): 3403(N-H), 3180(Ar-H), 1621(Ar C=C), 1402(C-H), 1074(Ar-Br), 858(C-C), 740(C-C). HRMS(ESI)  $m/z$ :  $[\text{M}+\text{H}]^+$  Calcd. for  $\text{C}_{17}\text{H}_{17}\text{BrN}^+$  314.0539, Found 314.0547.

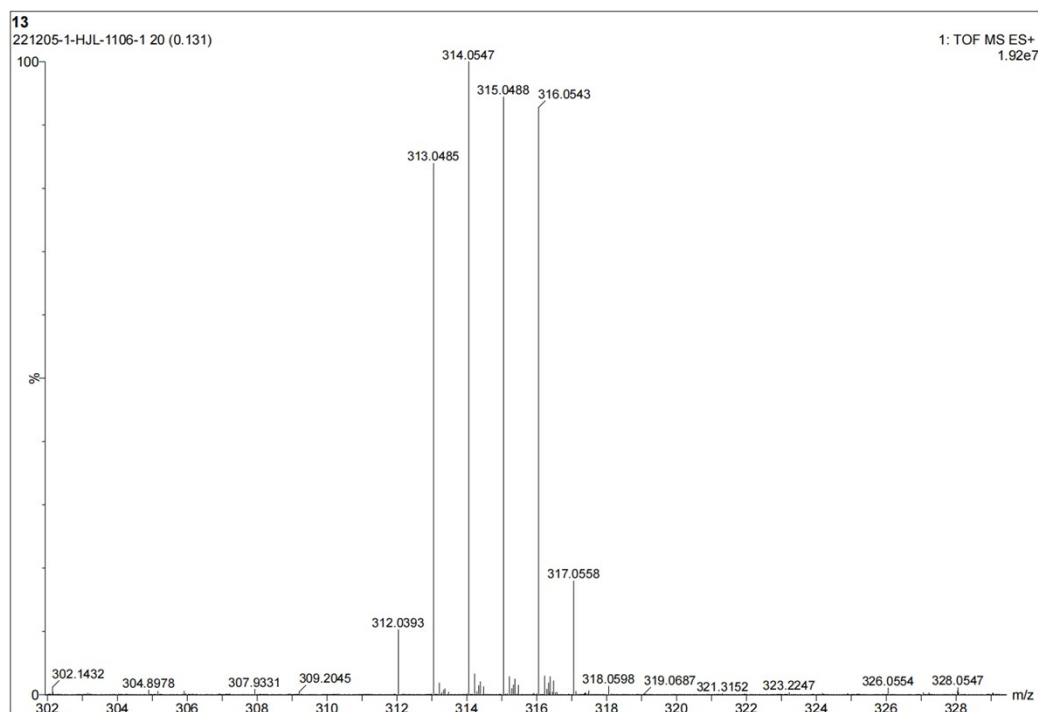

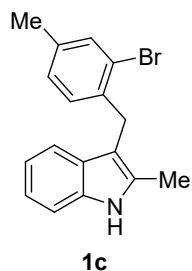

### 3-(2-bromo-4-methylbenzyl)-2-methyl-1*H*-indole (**1c**)

Flash column chromatography on a silica gel (PE/EA, v/v, 30:1) gives **1c** (730 mg, 47% yield) as a yellow oil;  $^1\text{H}$  NMR (500 MHz,  $\text{CDCl}_3$ )  $\delta$  7.75 (s, 1H), 7.51–7.47 (m, 1H), 7.42 (dd,  $J_1 = 7.9$  Hz,  $J_2 = 1.1$  Hz, 1H), 7.31 (dt,  $J_1 = 8.1$  Hz,  $J_2 = 0.9$  Hz, 1H), 7.2 – 7.17 (m, 1H), 7.12–7.08 (m, 1H), 6.94 (dd,  $J = 7.9$  Hz,  $J_2 = 1.7$  Hz, 1H), 6.89 (d,  $J = 7.9$  Hz, 1H), 4.17 (s, 2H), 2.36 (s, 3H), 2.32 (s, 3H).  $^{13}\text{C}$   $\{^1\text{H}\}$  NMR (125 MHz,  $\text{CDCl}_3$ )  $\delta$  137.4, 137.2, 135.4, 132.9, 132.3, 129.7, 129.0, 128.1, 124.3, 121.1, 119.4, 118.5, 110.2, 109.2, 30.0, 20.6, 11.8. IR ( $\text{cm}^{-1}$ ): 3404(N-H), 3189(Ar-H), 1654(Ar C=C), 1402(C-H), 1083(Ar-Br), 930(C-C). HRMS(ESI)  $m/z$ :  $[\text{M}+\text{H}]^+$  Calcd. for  $\text{C}_{17}\text{H}_{17}\text{BrN}^+$  314.0539, Found 314.0544.

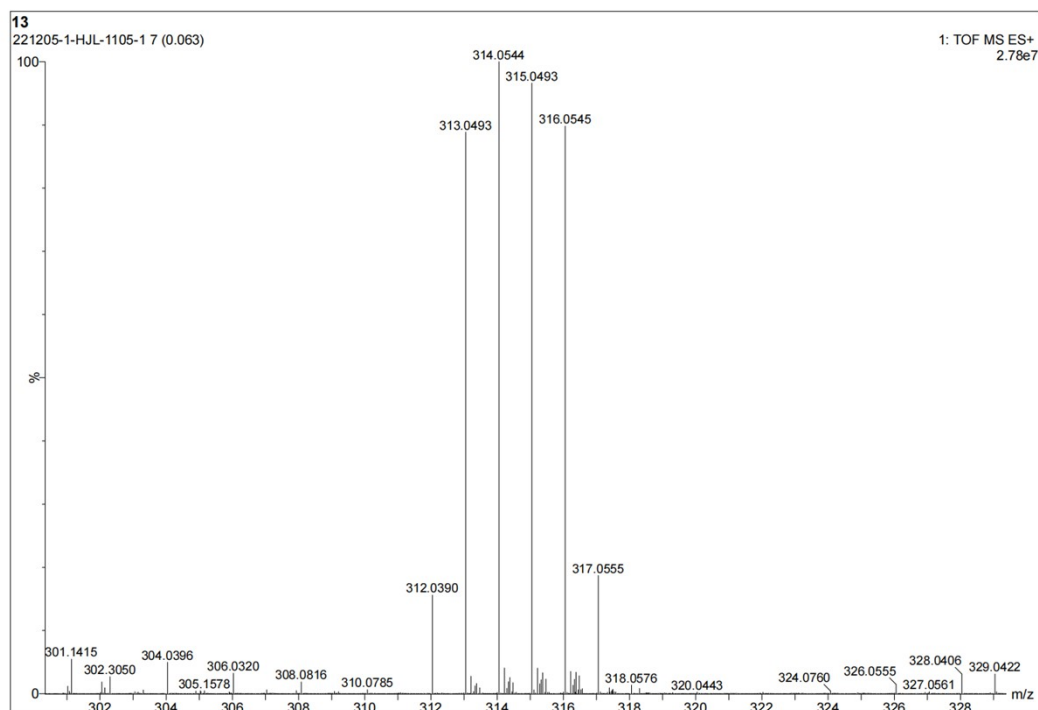

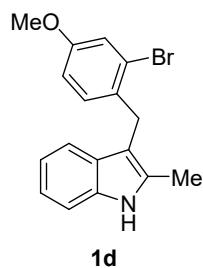

### 3-(2-bromo-4-methoxybenzyl)-2-methyl-1*H*-indole (**1d**)

Flash column chromatography on a silica gel (PE/EA, v/v, 30:1) gives **1d** (1.15 g, 87% yield) as a reddish solid: m.p. 68-69 °C; <sup>1</sup>H NMR (500 MHz, CDCl<sub>3</sub>) δ 7.76 (s, 1H), 7.41 (d, *J* = 8.0 Hz, 1H), 7.30 (d, *J* = 8.1 Hz, 1H), 7.24 – 7.16 (m, 2H), 7.12 – 7.08 (m, 1H), 6.91 (d, *J* = 8.6 Hz, 1H), 6.70 (dd, *J*<sub>1</sub> = 8.6 Hz, *J*<sub>2</sub> = 2.7 Hz, 1H), 4.14 (s, 2H), 3.78 (s, 3H), 2.35 (s, 3H). <sup>13</sup>C{<sup>1</sup>H} NMR (125 MHz, CDCl<sub>3</sub>) δ 158.3, 135.4, 132.4, 132.3, 130.4, 129.0, 124.5, 121.2, 119.4, 118.5, 117.8, 113.5, 110.3, 109.4, 55.6, 29.6, 11.8. IR (cm<sup>-1</sup>): 3394(N-H), 3181(Ar-H), 1647(Ar C=C), 1558(C-N), 1487(C-H), 1402(C-H), 1160(C-O-C), 1084(Ar-Br), 929(C-C). HRMS(ESI) *m/z*: [M+H]<sup>+</sup> Calcd. for C<sub>17</sub>H<sub>17</sub>BrNO<sup>+</sup> 330.0488, Found 330.0486.

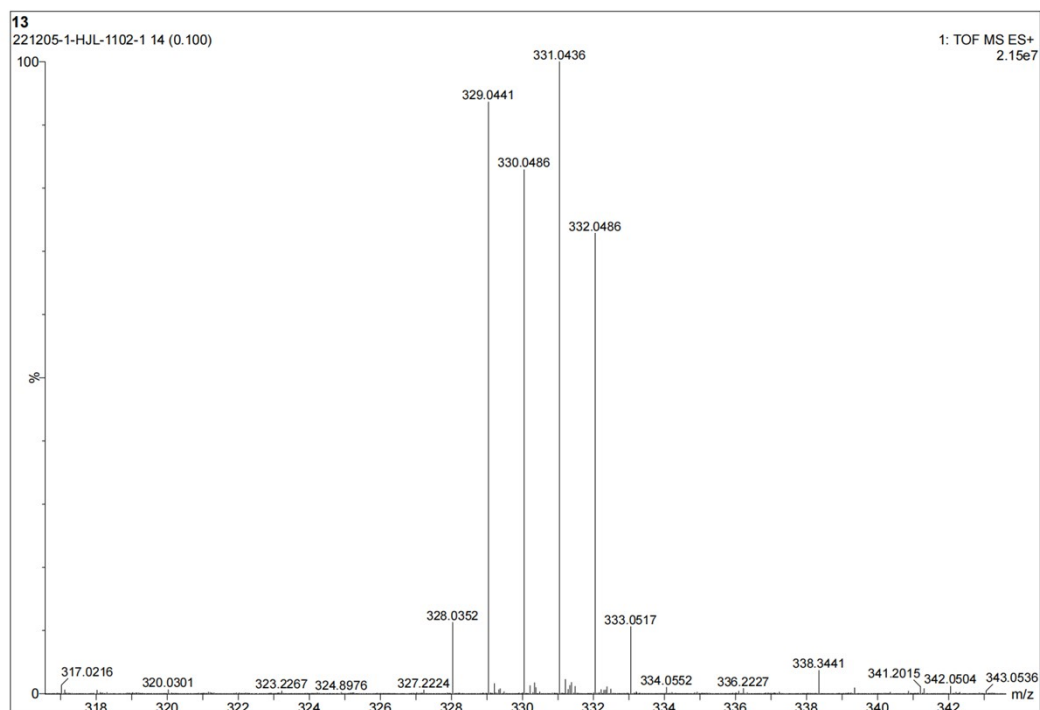

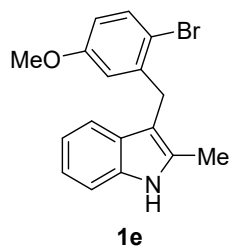

### 3-(2-bromo-5-methoxybenzyl)-2-methyl-1H-indole (**1e**)

Flash column chromatography on a silica gel (PE/EA, v/v, 30:1) gives **1e** (1.44 g, 88% yield) as a yellow oil;  $^1\text{H}$  NMR (500 MHz,  $\text{CDCl}_3$ )  $\delta$  7.80 (s, 1H), 7.50 (dd,  $J_1 = 8.7$  Hz,  $J_2 = 4.7$  Hz, 1H), 7.39 (t,  $J = 6.7$  Hz, 1H), 7.28 (d,  $J = 8.1$  Hz, 1H), 7.17–7.12 (m, 1H), 7.10–7.02 (m, 1H), 6.65–6.61 (m, 1H), 6.59 – 6.55 (m, 1H), 4.13 (d,  $J = 4.6$  Hz, 2H), 3.61 (d,  $J = 2.1$  Hz, 3H), 2.34 (s, 3H).  $^{13}\text{C}\{^1\text{H}\}$  NMR (125 MHz,  $\text{CDCl}_3$ )  $\delta$  159.0, 141.6, 135.4, 132.9, 132.4, 128.9, 121.2, 119.4, 118.4, 116.4, 115.1, 112.5, 110.2, 108.9, 55.3, 30.6, 11.8. IR ( $\text{cm}^{-1}$ ): 3404(N-H), 3186(Ar-H), 1647(Ar C=C), 1558(C-N), 1462(C-H), 1402(C-H), 1157(C-O-C), 1084(Ar-Br), 930(C-C), 745(C-C). HRMS(ESI)  $m/z$ :  $[\text{M}+\text{H}]^+$  Calcd. for  $\text{C}_{17}\text{H}_{17}\text{BrNO}^+$  330.0488, Found 330.0493.

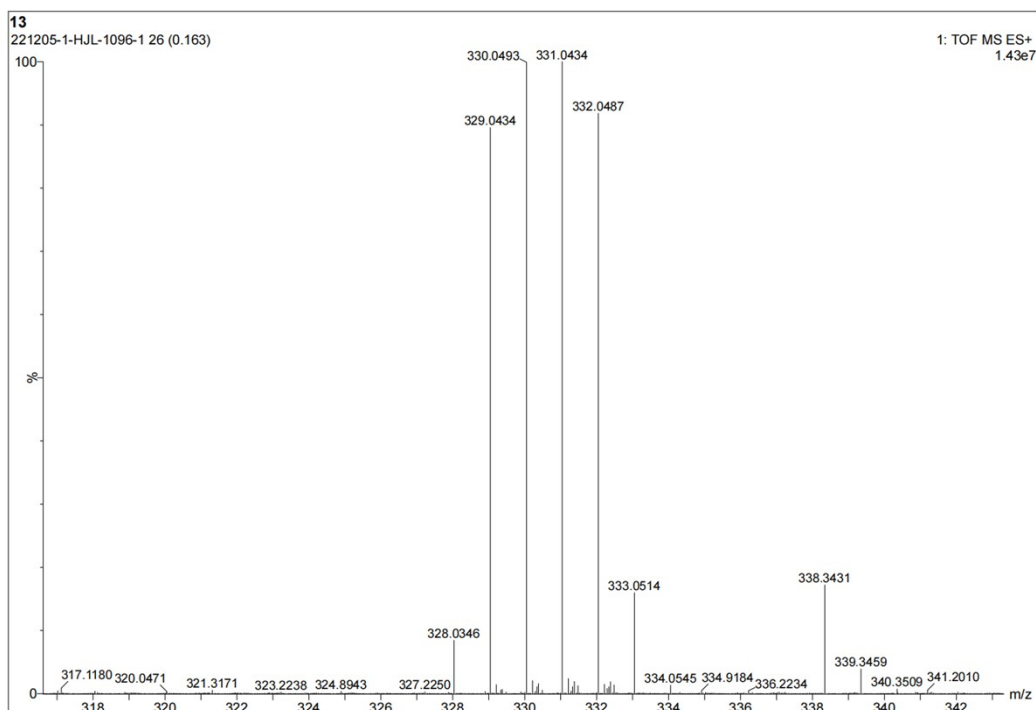

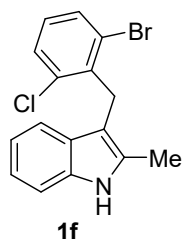

### 3-(2-bromo-5-fluorobenzyl)-2-methyl-1H-indole (**1f**)

Flash column chromatography on a silica gel (PE/EA, v/v, 30:1) gives **1f** (1.35 g, 80% yield) as a light pink solid: m.p. 165-166 °C;  $^1\text{H}$  NMR (500 MHz,  $\text{CDCl}_3$ )  $\delta$  7.67 (s, 1H), 7.53 (dd,  $J_1 = 8.0$  Hz,  $J_2 = 1.3$  Hz, 1H), 7.41 – 7.33 (m, 2H), 7.24 (d,  $J = 8.0$  Hz, 1H), 7.10 (td,  $J_1 = 8.0$  Hz,  $J_2 = 7.6$  Hz,  $J_3 = 1.2$  Hz, 1H), 7.06 – 7.00 (m, 2H), 4.42 (s, 2H), 2.26 (s, 3H).  $^{13}\text{C}\{^1\text{H}\}$  NMR (125 MHz,  $\text{CDCl}_3$ )  $\delta$  138.2, 136.2, 135.1, 131.8, 131.7, 129.1, 128.6, 128.3, 126.7, 120.8, 119.2, 118.6, 110.2, 107.4, 30.4, 12.2. IR ( $\text{cm}^{-1}$ ): 3436(N-H), 2984(C-H), 1622(Ar C=C), 1454(C-H), 1067(Ar-Cl), 1003(Ar-Br), 910(C-C), 777(C-C). HRMS(ESI)  $m/z$ :  $[\text{M}+\text{H}]^+$  Calcd. for  $\text{C}_{16}\text{H}_{14}\text{BrClN}^+$  333.9993, Found 334.0001.

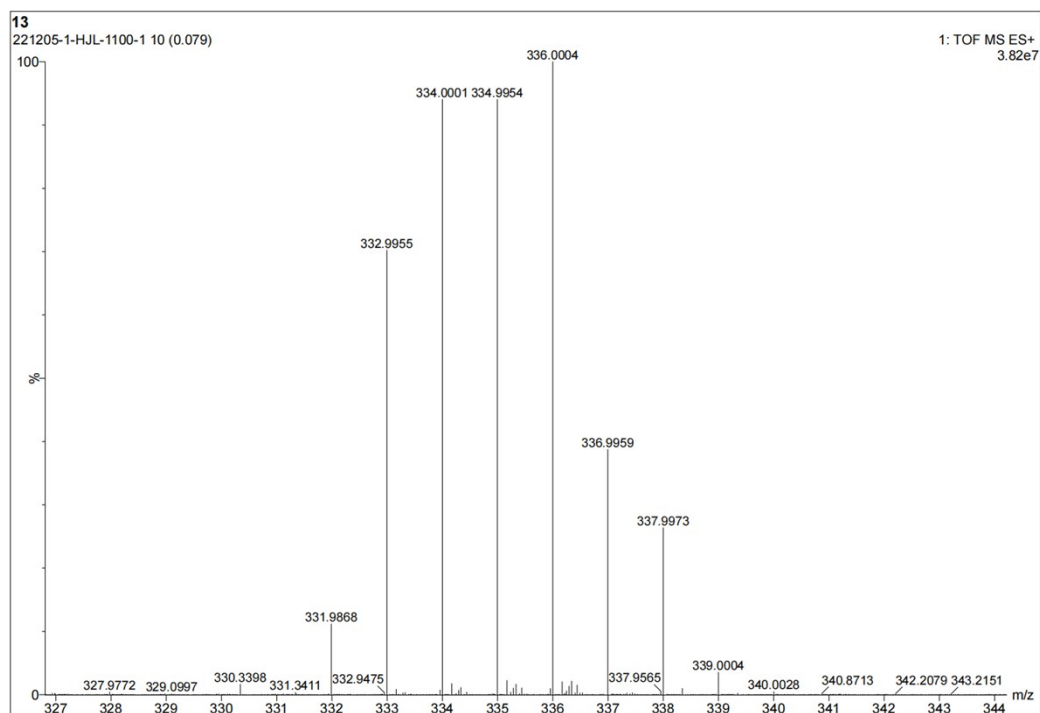

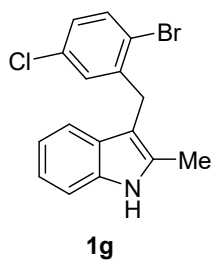

### 3-(2-bromo-5-chlorobenzyl)-2-methyl-1H-indole (**1g**)

Flash column chromatography on a silica gel (PE/EA, v/v, 60:1) gives **1g** (1.03 g, 62% yield) as a yellowish solid: mp 68-69 °C;  $^1\text{H}$  NMR (500 MHz,  $\text{CDCl}_3$ )  $\delta$  7.84 (s, 1H), 7.58 (d,  $J = 8.5$  Hz, 1H), 7.48 (d,  $J = 8.1$  Hz, 1H), 7.36 – 7.34 (m, 1H), 7.30 – 7.26 (m, 1H), 7.21 – 7.18 (m, 1H), 7.10 (dd,  $J_1 = 8.5$  Hz,  $J_2 = 2.6$  Hz, 1H), 7.05 (d,  $J = 2.6$  Hz, 1H), 4.22 (s, 2H), 2.36 (s, 3H).  $^{13}\text{C}\{^1\text{H}\}$  NMR (125 MHz,  $\text{CDCl}_3$ )  $\delta$  142.4, 135.4, 133.53, 133.49, 132.6, 129.9, 128.7, 127.7, 122.4, 121.4, 119.6, 118.2, 110.4, 108.2, 30.5, 11.9. IR ( $\text{cm}^{-1}$ ): 3389(N-H), 3169(Ar-H), 1660(Ar C=C), 1458(C-H), 1402(C-H), 1093(Ar-Cl), 1030(Ar-Br), 935(C-C), 816(C-C), 737(C-C). HRMS(ESI)  $m/z$ :  $[\text{M}+\text{H}]^+$  Calcd. for  $\text{C}_{16}\text{H}_{14}\text{BrClN}^+$  333.9993, Found 333.9991.

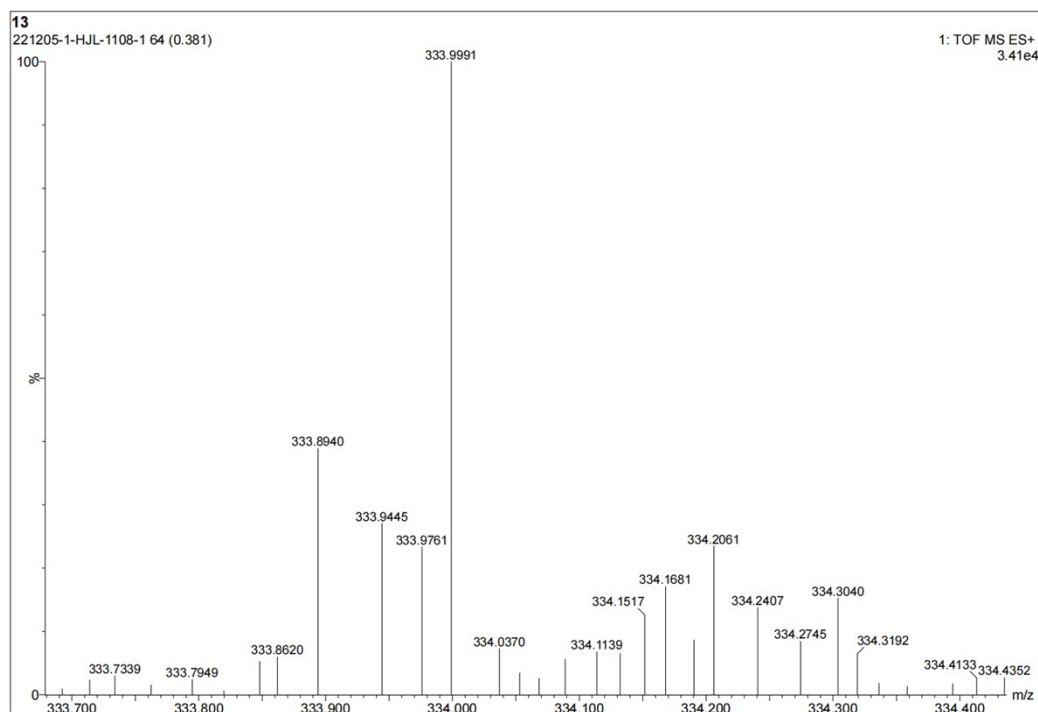

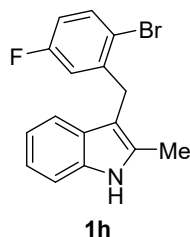

### 3-(2-bromo-5-fluorobenzyl)-2-methyl-1H-indole (**1h**)

Flash column chromatography on a silica gel (PE/EA, v/v, 30:1) gives **1h** (1.47 g, 93% yield) as a yellowish solid: m.p. 121-122 °C;  $^1\text{H}$  NMR (500 MHz,  $\text{CDCl}_3$ )  $\delta$  7.79 (s, 1H), 7.58 (dd,  $J_1 = 8.7$  Hz,  $J_2 = 5.4$  Hz, 1H), 7.41 (d,  $J = 7.9$  Hz, 1H), 7.34 (d,  $J = 8.1$  Hz, 1H), 7.24 – 7.20 (m, 1H), 7.15 – 7.11 (m, 1H), 6.82 (td,  $J_1 = 8.2$  Hz,  $J_2 = 3.1$  Hz, 1H), 6.72 (dd,  $J_1 = 9.9$  Hz,  $J_2 = 3.1$  Hz, 1H), 4.17 (s, 2H), 2.36 (s, 3H).  $^{13}\text{C}\{^1\text{H}\}$  NMR (125 MHz,  $\text{CDCl}_3$ )  $\delta$  162.3 (d,  $J_{\text{C-F}} = 244.4$  Hz), 142.9 (d,  $J_{\text{C-F}} = 6.9$  Hz), 135.5, 133.5 (d,  $J_{\text{C-F}} = 8.0$  Hz), 132.7, 128.8, 121.4, 119.7, 118.5 (d,  $J_{\text{C-F}} = 2.9$  Hz, 1H), 118.3, 117.0 (d,  $J_{\text{C-F}} = 23.5$  Hz), 114.7 (d,  $J_{\text{C-F}} = 22.6$  Hz), 110.5, 108.3, 30.6, 11.8.  $^{19}\text{F}$  NMR (471 MHz,  $\text{CDCl}_3$ )  $\delta$  -114.9. IR ( $\text{cm}^{-1}$ ): 3388(N-H), 3050(Ar-H), 1610(Ar C=C), 1460(C-H), 1300(C-H), 1174(Ar-F), 1003(Ar-Br), 870(C-C), 815(C-C), 741(C-C). HRMS(ESI)  $m/z$ :  $[\text{M}+\text{H}]^+$  Calcd. for  $\text{C}_{16}\text{H}_{14}\text{BrFN}^+$  318.0288, Found 318.0293.

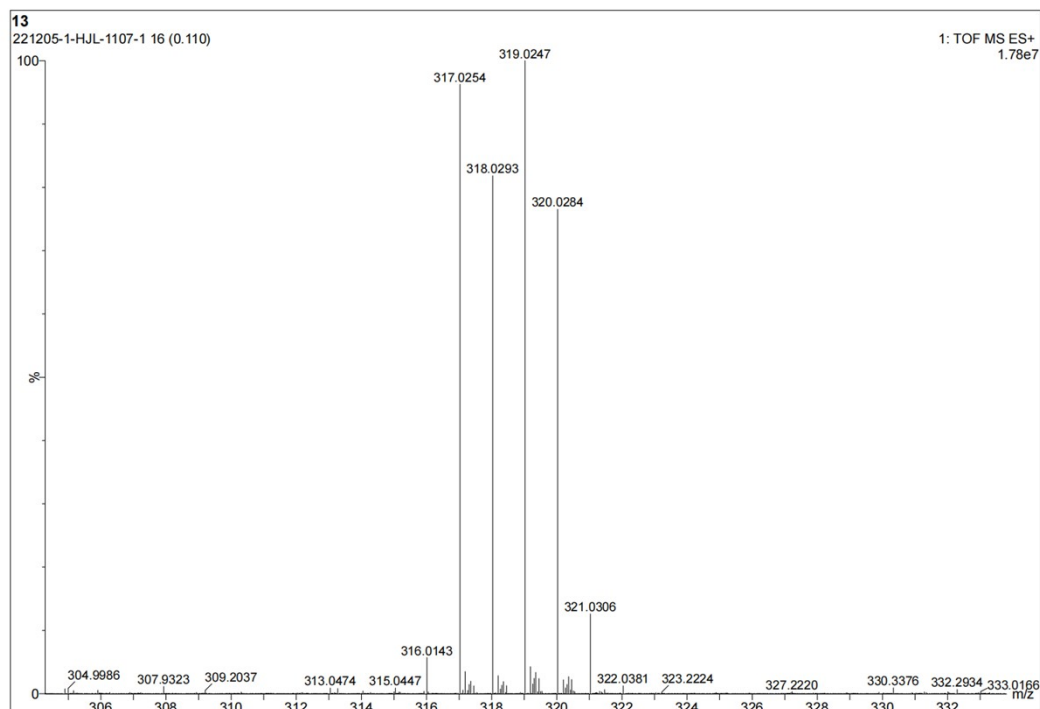



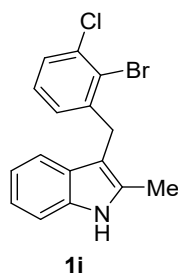

### 3-(2-bromo-3-chlorobenzyl)-2-methyl-1*H*-indole (**1i**)

Flash column chromatography on a silica gel (PE/EA, v/v, 30:1) gives **1i** (580 mg, 43% yield) as a yellowish solid: m.p. 69-70 °C; <sup>1</sup>H NMR (500 MHz, CDCl<sub>3</sub>) δ 7.85 (s, 1H), 7.32 (d, *J* = 1.2 Hz, 1H), 7.31 – 7.29 (m, 2H), 7.17 – 7.13 (m, 1H), 7.07 – 7.00 (m, 2H), 6.84 – 6.80 (m, 1H), 4.18 (s, 2H), 2.35 (s, 3H). <sup>13</sup>C{<sup>1</sup>H} NMR (125 MHz, CDCl<sub>3</sub>) δ 143.1, 135.4, 134.9, 132.6, 128.8, 127.9, 127.8, 127.7, 124.5, 121.3, 119.5, 118.3, 110.3, 108.7, 31.8, 11.8. IR (cm<sup>-1</sup>): 3401(N-H), 3174(Ar-H), 1654(Ar C=C), 1402(C-H), 1085(Ar-Cl), 1000(Ar-Br), 930(C-C). HRMS(ESI) *m/z*: [M+H]<sup>+</sup> Calcd. for C<sub>16</sub>H<sub>14</sub>BrClN<sup>+</sup> 333.9993, Found 333.9996.

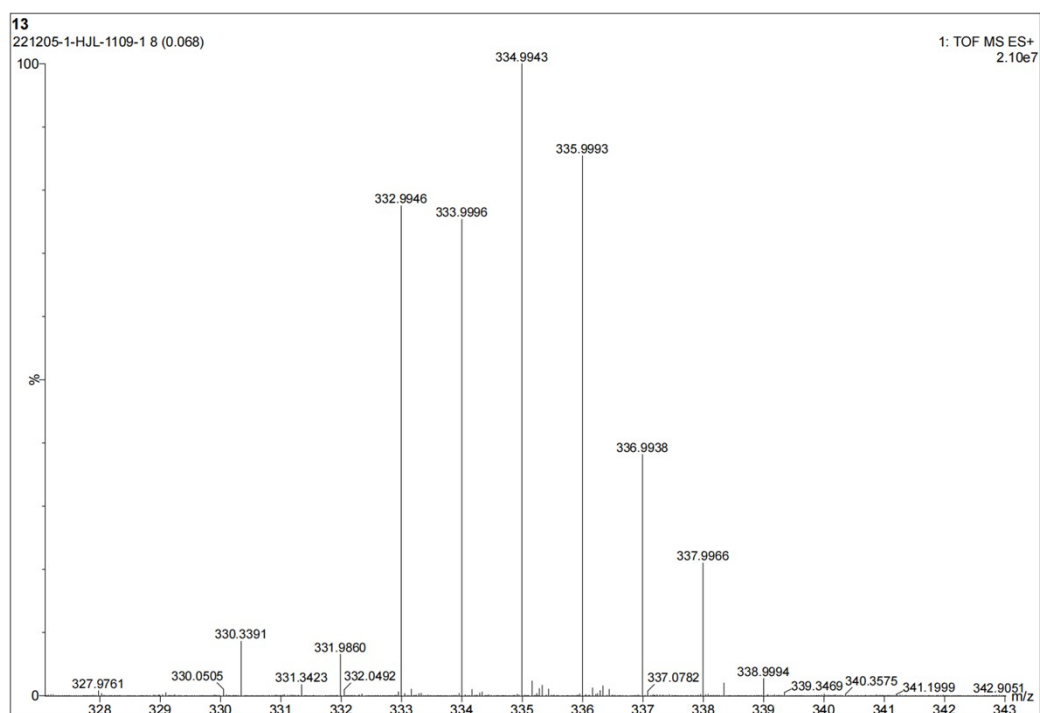

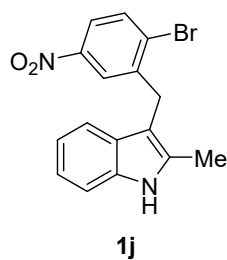

### 3-(2-bromo-5-nitrobenzyl)-2-methyl-1*H*-indole (**1j**)

Flash column chromatography on a silica gel (PE/EA, v/v, 30:1) gives **1j** (1.26 g, 74% yield) as a yellow solid: m.p. 150-151 °C; <sup>1</sup>H NMR (500 MHz, CDCl<sub>3</sub>) δ 7.98 (s, 1H), 7.89 (dd, *J*<sub>1</sub> = 8.7 Hz, *J*<sub>2</sub> = 2.8 Hz, 1H), 7.85 – 7.70 (m, 2H), 7.32 (d, *J* = 8.2 Hz, 1H), 7.29 (d, *J* = 7.8 Hz, 1H), 7.16 (t, *J* = 7.5 Hz, 1H), 7.06 (t, *J* = 7.5 Hz, 1H), 4.20 (s, 2H), 2.39 (s, 3H). <sup>13</sup>C{<sup>1</sup>H} NMR (125 MHz, CDCl<sub>3</sub>) δ 147.5, 142.8, 135.5, 133.4, 132.7, 131.7, 128.4, 124.6, 122.2, 121.6, 119.7, 117.9, 110.5, 107.4, 30.7, 11.9. IR (cm<sup>-1</sup>): 3389(N-H), 3169(Ar-H), 1654(Ar C=C), 1617(NO<sub>2</sub>), 1402(C-H), 1085(Ar-Br), 928(C-C), 746(C-C). HRMS(ESI) *m/z*: [M+H]<sup>+</sup> Calcd. for C<sub>16</sub>H<sub>14</sub>BrN<sub>2</sub>O<sub>2</sub><sup>+</sup> 345.0233, Found 345.0240.

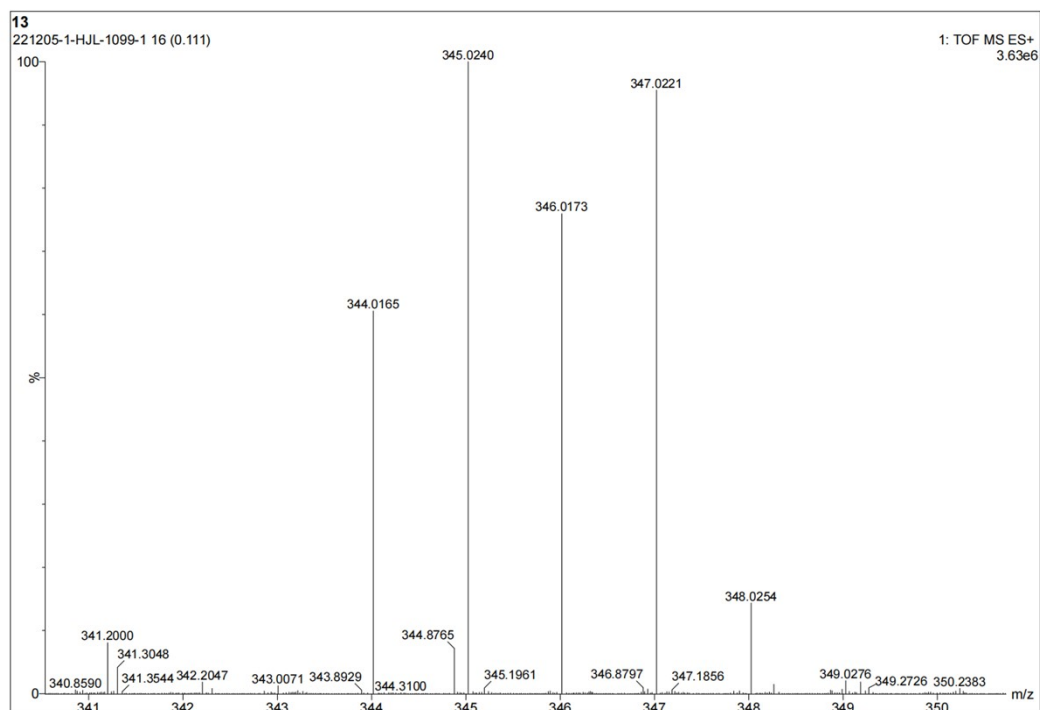

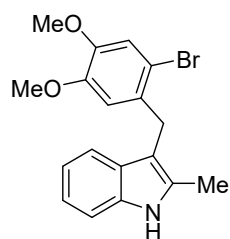

**1k**

### 3-(2-bromo-4,5-dimethoxybenzyl)-2-methyl-1H-indole (**1k**)

Flash column chromatography on a silica gel (PE/EA, v/v, 30:1) gives **1k** (470 mg, 26% yield) as a yellowish solid: m.p. 134-135 °C;  $^1\text{H}$  NMR (500 MHz,  $\text{CDCl}_3$ )  $\delta$  7.85 (s, 1H), 7.37 (dd,  $J_1 = 7.9$  Hz,  $J_2 = 1.1$  Hz, 1H), 7.28 (d,  $J = 8.0$  Hz, 1H), 7.13 – 7.10 (m, 1H), 7.08 – 7.00 (m, 2H), 6.57 (s, 1H), 4.08 (s, 2H), 3.85 (s, 3H), 3.56 (s, 3H), 2.36 (s, 3H).  $^{13}\text{C}\{^1\text{H}\}$  NMR (125 MHz,  $\text{CDCl}_3$ )  $\delta$  148.4, 147.8, 135.4, 132.5, 132.1, 128.9, 121.1, 119.4, 118.5, 115.4, 114.1, 113.1, 110.2, 109.4, 56.2, 55.9, 30.0, 11.9. IR ( $\text{cm}^{-1}$ ): 3359(N-H), 3187(Ar-H), 1654(Ar C=C), 1503(C-N), 1402(C-H), 1161(C-O-C), 1084(Ar-Br), 929(C-C). HRMS(ESI)  $m/z$ :  $[\text{M}+\text{H}]^+$  Calcd. for  $\text{C}_{18}\text{H}_{19}\text{BrNO}_2^+$  360.0594, Found 360.0595.

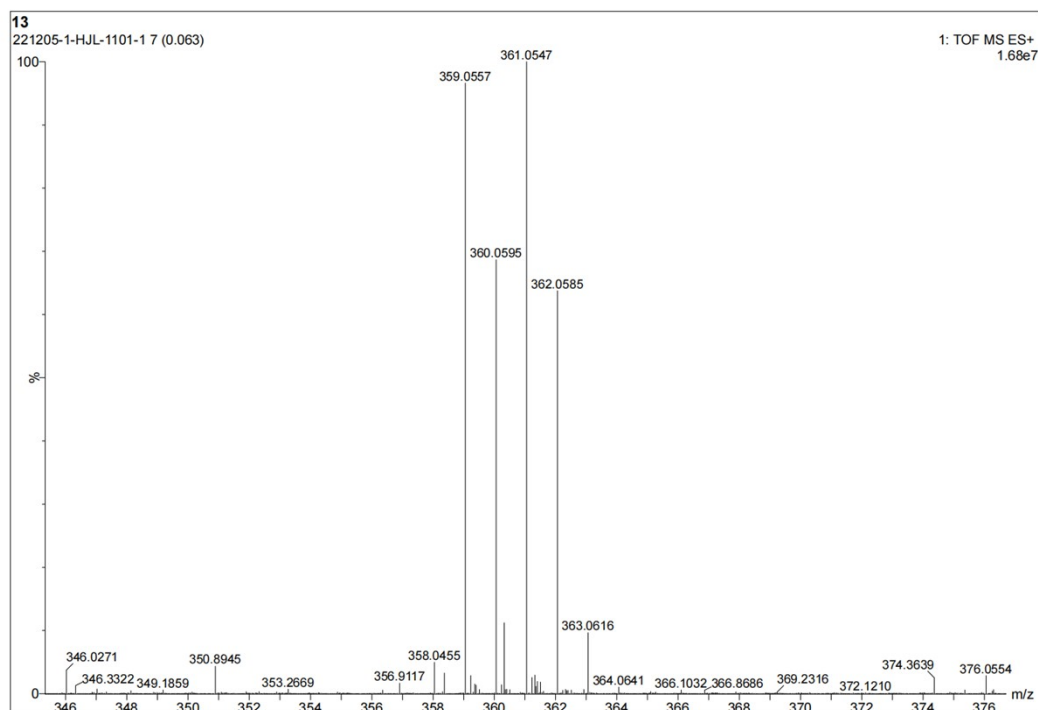

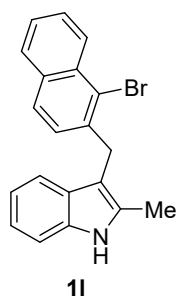

### 3-((1-bromonaphthalen-2-yl)methyl)-2-methyl-1H-indole (**11**)

Flash column chromatography on a silica gel (PE/EA, v/v, 30:1) gives **11** (860 mg, 70% yield) as a yellow solid: m.p. 138-139 °C; <sup>1</sup>H NMR (500 MHz, CDCl<sub>3</sub>) δ 8.43 (d, *J*<sub>1</sub> = 8.6 Hz, 1H), 7.82 – 7.75 (m, 2H), 7.64 – 7.57 (m, 2H), 7.51 – 7.47 (m, 1H), 7.41 (d, *J* = 7.9 Hz, 1H), 7.31 (d, *J* = 8.0 Hz, 1H), 7.18 – 7.13 (m, 2H), 7.06 (t, *J* = 7.5 Hz, 1H), 4.44 (s, 2H), 2.37 (s, 3H). <sup>13</sup>C{<sup>1</sup>H} NMR (126 MHz, CDCl<sub>3</sub>) δ 138.7, 135.4, 133.4, 132.6, 132.4, 129.1, 128.1, 127.6, 127.4, 127.32, 127.28, 125.9, 123.7, 121.2, 119.5, 118.5, 110.3, 109.6, 31.5, 11.9. IR (cm<sup>-1</sup>): 3375(N-H), 3165(Ar-H), 1616(Ar C=C), 1402(C-H), 1084(Ar-Br), 929(C-C). HRMS(ESI) *m/z*: [M+H]<sup>+</sup> Calcd. for C<sub>20</sub>H<sub>17</sub>BrN<sup>+</sup> 350.0539, Found 350.0544.

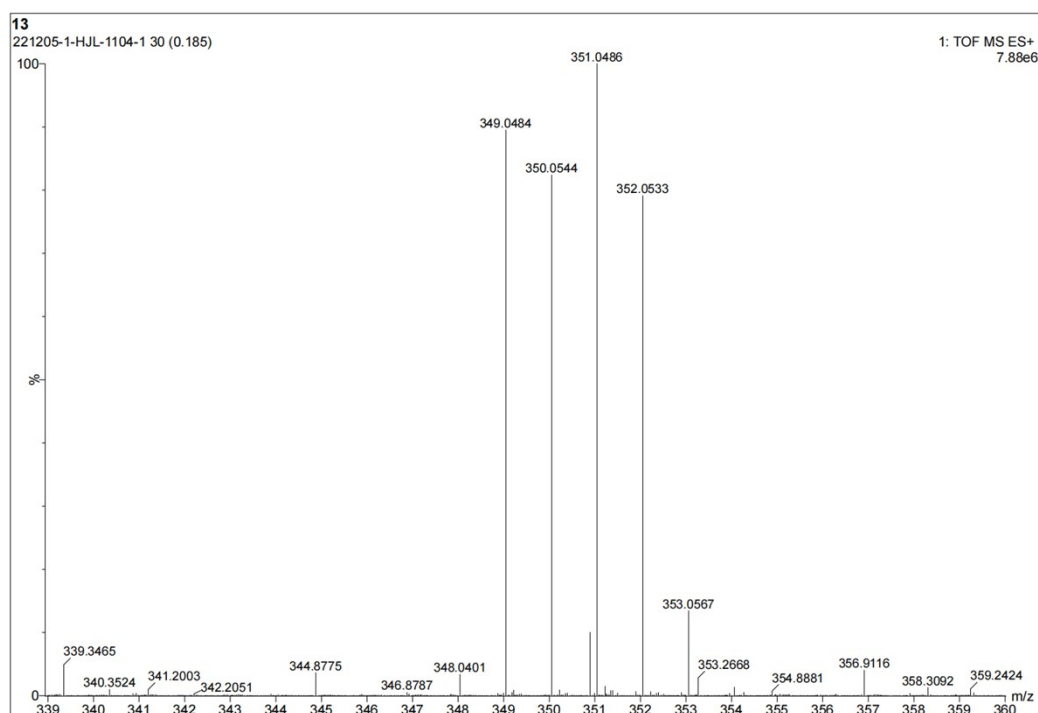

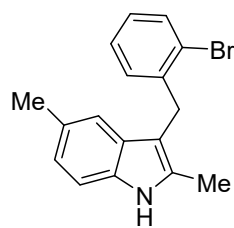

**1m**

### 3-(2-bromobenzyl)-2,5-dimethyl-1*H*-indole (**1m**)

Flash column chromatography on a silica gel (PE/EA, v/v, 30:1) gives **1m** (660 mg, 42% yield) as a white solid: m.p. 141-142 °C; <sup>1</sup>H NMR (500 MHz, CDCl<sub>3</sub>) δ 7.71 (s, 1H), 7.61 (dd, *J*<sub>1</sub> = 7.9 Hz, *J*<sub>2</sub> = 1.4 Hz, 1H), 7.21 (d, *J* = 8.2 Hz, 1H), 7.16 (s, 1H), 7.13 – 7.10 (m, 1H), 7.08 – 7.04 (m, 1H), 6.99 (dd, *J*<sub>1</sub> = 8.2 Hz, *J*<sub>2</sub> = 1.6 Hz, 1H), 6.97 – 6.94 (m, 1H), 4.14 (s, 2H), 2.42 (s, 3H), 2.33 (s, 3H). <sup>13</sup>C{<sup>1</sup>H} NMR (125 MHz, CDCl<sub>3</sub>) δ 140.5, 133.7, 132.6, 132.4, 130.0, 129.3, 128.6, 127.42, 127.36, 124.7, 122.7, 118.2, 110.0, 108.5, 30.4, 21.6, 11.9. IR (cm<sup>-1</sup>): 3390(N-H), 3178(Ar-H), 1647(Ar C=C), 1402(C-H), 1085(Ar-Br), 930(C-C), 750(C-C). HRMS(ESI) *m/z*: [M+H]<sup>+</sup> Calcd. for C<sub>17</sub>H<sub>17</sub>BrN<sup>+</sup> 314.0539, Found 314.0542.

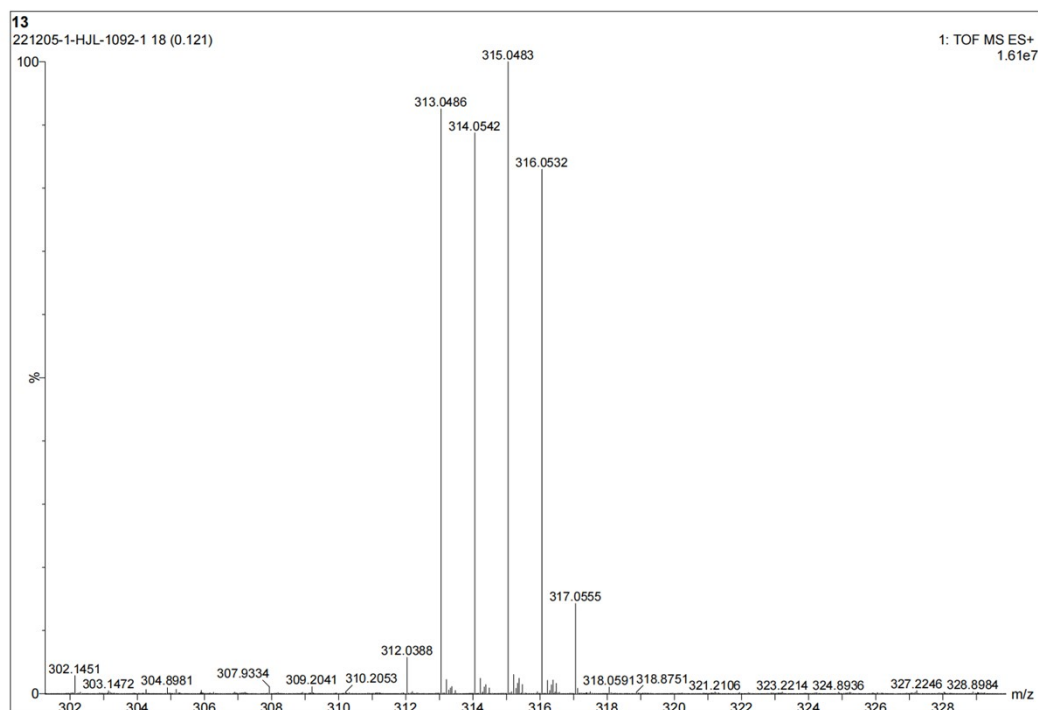

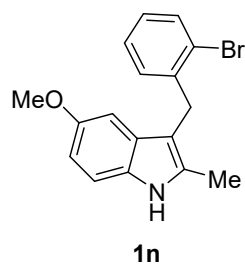

### 3-(2-bromobenzyl)-5-methoxy-2-methyl-1H-indole (**1n**)

Flash column chromatography on a silica gel (PE/EA, v/v, 30:1) gives **1n** (270 mg, 16% yield) as a yellowish solid: m.p. 105-106 °C;  $^1\text{H}$  NMR (500 MHz,  $\text{CDCl}_3$ )  $\delta$  7.77 (s, 1H), 7.59 (dd,  $J_1 = 7.9$  Hz,  $J_2 = 1.4$  Hz, 1H), 7.18 (dd,  $J_1 = 8.6$  Hz,  $J_2 = 0.6$  Hz, 1H), 7.13 – 7.09 (m, 1H), 7.06 – 7.02 (m, 1H), 6.97 (dd,  $J_1 = 7.6$  Hz,  $J_2 = 1.9$  Hz, 1H), 6.83–6.76 (m, 2H), 4.12 (s, 2H), 3.78 (s, 3H), 2.33 (s, 3H).  $^{13}\text{C}$   $\{^1\text{H}\}$  NMR (125 MHz,  $\text{CDCl}_3$ )  $\delta$  154.0, 140.3, 133.3, 132.5, 130.5, 130.0, 129.4, 127.5, 127.4, 124.6, 110.9, 110.8, 108.9, 100.9, 55.9, 30.5, 11.9. IR ( $\text{cm}^{-1}$ ): 3403(N-H), 3180(Ar-H), 1654(Ar C=C), 1402(C-H), 1160(C-O-C), 1084(Ar-Br), 931(C-C). HRMS(ESI)  $m/z$ :  $[\text{M}+\text{H}]^+$  Calcd. for  $\text{C}_{17}\text{H}_{17}\text{BrNO}^+$  330.0488, Found 330.0496.

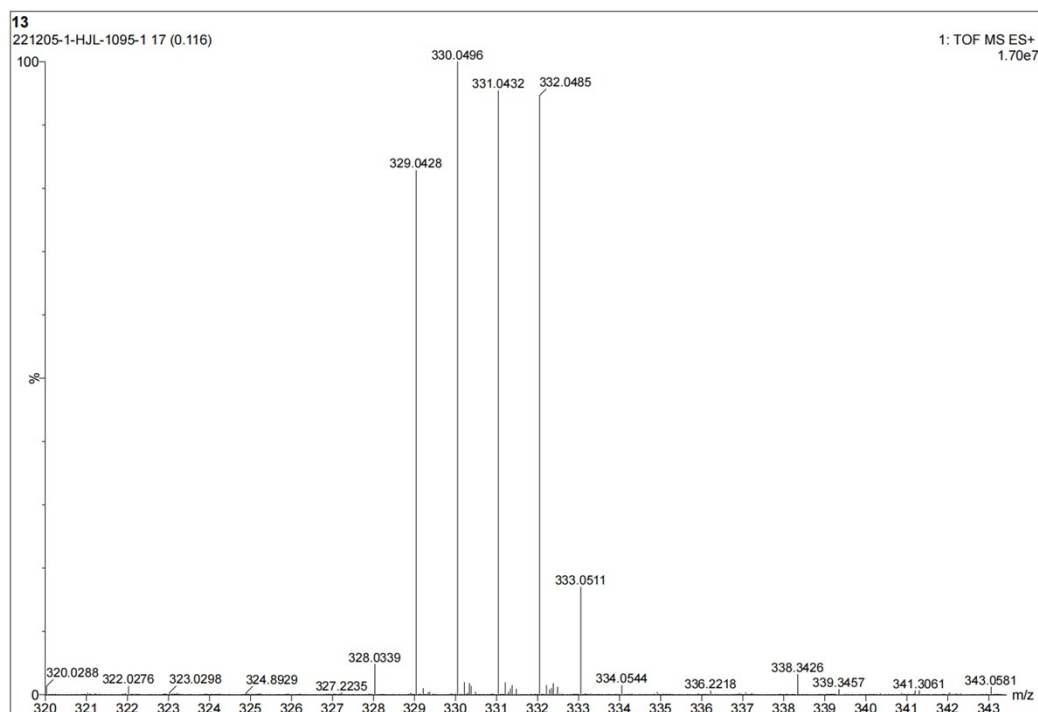

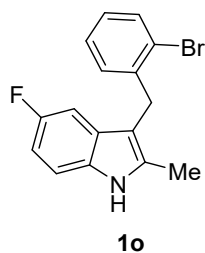

### 3-(2-bromobenzyl)-5-fluoro-2-methyl-1*H*-indole (**1o**)

Flash column chromatography on a silica gel (PE/EA, v/v, 30:1) gives **1o** (320 mg, 20% yield) as a brown solid: m.p. 115-116 °C; <sup>1</sup>H NMR (500 MHz, CDCl<sub>3</sub>) δ 7.84 (s, 1H), 7.58 (dd, *J*<sub>1</sub> = 7.9 Hz, *J*<sub>2</sub> = 1.4 Hz, 1H), 7.21 – 7.18 (m, 1H), 7.13 – 7.10 (m, 1H), 7.06 – 7.03 (m, 1H), 6.98 – 6.92 (m, 2H), 6.85 (td, *J*<sub>1</sub> = 9.0 Hz, *J*<sub>2</sub> = 2.5 Hz, 1H), 4.09 (s, 2H), 2.36 (s, 3H). <sup>13</sup>C{<sup>1</sup>H} NMR (125 MHz, CDCl<sub>3</sub>) δ 157.9 (d, *J*<sub>C-F</sub> = 232.8 Hz), 139.9, 134.3, 132.6, 131.8, 129.9, 129.4 (d, *J*<sub>C-F</sub> = 9.7 Hz), 127.5 (d, *J*<sub>C-F</sub> = 28.8 Hz), 124.6, 110.7 (d, *J*<sub>C-F</sub> = 9.7 Hz), 109.34 (d, *J*<sub>C-F</sub> = 4.2 Hz), 109.26, 109.1, 103.5 (d, *J*<sub>C-F</sub> = 23.5 Hz), 30.5, 12.0. <sup>19</sup>F NMR (471 MHz, CDCl<sub>3</sub>) δ -124.8. IR (cm<sup>-1</sup>): 3421(N-H), 3280(Ar-H), 1647(Ar C=C), 1402(C-H), 1092(Ar-F), 940(C-C). HRMS(ESI) *m/z*: [M+H]<sup>+</sup> Calcd. for C<sub>16</sub>H<sub>14</sub>BrFN<sup>+</sup> 318.0288, Found 318.0293.

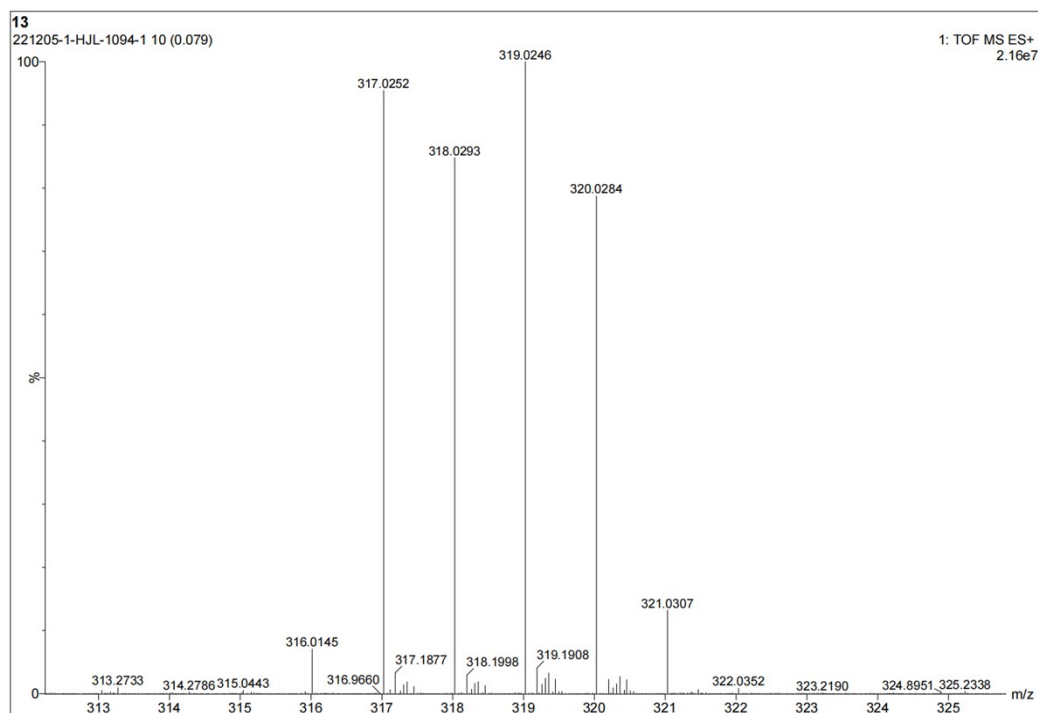

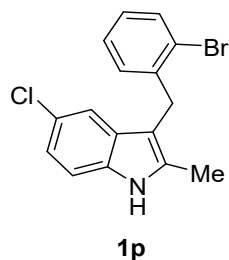

### 3-(2-bromobenzyl)-5-chloro-2-methyl-1H-indole (**1p**)

Flash column chromatography on a silica gel (PE/EA, v/v, 30:1) gives **1p** (940 mg, 56% yield) as a yellowish solid: m.p. 137-138 °C;  $^1\text{H}$  NMR (500 MHz,  $\text{CDCl}_3$ )  $\delta$  7.87 (s, 1H), 7.59 (dd,  $J_1 = 7.9$  Hz,  $J_2 = 1.4$  Hz, 1H), 7.29 (d,  $J = 2.0$  Hz, 1H), 7.20 (d,  $J = 8.4$  Hz, 1H), 7.12 (t,  $J = 7.4$  Hz, 1H), 7.08 – 7.03 (m, 2H), 6.91 (dd,  $J_1 = 7.7$  Hz,  $J_2 = 1.8$  Hz, 1H), 4.09 (s, 2H), 2.34 (s, 3H).  $^{13}\text{C}\{^1\text{H}\}$  NMR (125 MHz,  $\text{CDCl}_3$ )  $\delta$  139.8, 134.0, 133.7, 132.6, 130.1, 129.8, 127.6, 127.4, 125.1, 124.6, 121.4, 117.9, 111.2, 108.9, 30.3, 11.9. IR ( $\text{cm}^{-1}$ ): 3415(N-H), 3169(Ar-H), 1654(Ar C=C), 1467(C-H), 1402(C-H), 1085(Ar-Cl), 1000(Ar-Br), 930(C-C), 801(C-C), 754(C-C). HRMS(ESI)  $m/z$ :  $[\text{M}+\text{H}]^+$  Calcd. for  $\text{C}_{16}\text{H}_{14}\text{BrClN}^+$  333.9993, Found 333.9988.

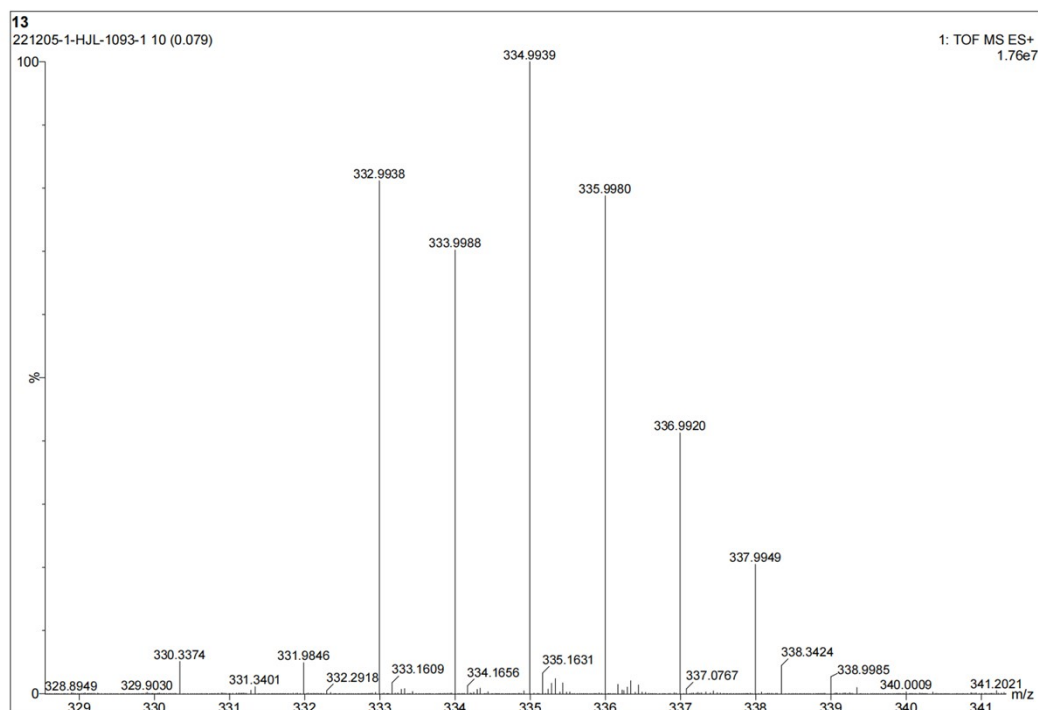



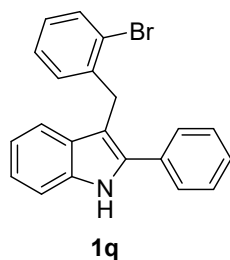

### 3-(2-bromobenzyl)-2-phenyl-1*H*-indole (**1q**)<sup>1</sup>

Flash column chromatography on a silica gel (PE/EA, v/v, 30:1) gives **1q** (1.20 g, 67% yield) as a yellow oil; <sup>1</sup>H NMR (500 MHz, CDCl<sub>3</sub>) δ 8.19 (s, 1H), 7.64 (dd, *J*<sub>1</sub> = 7.7 Hz, *J*<sub>2</sub> = 1.7 Hz, 1H), 7.48 – 7.45 (m, 3H), 7.44 – 7.35 (m, 4H), 7.27 – 7.23 (m, 1H), 7.09 (m, 3H), 7.03 (dd, *J*<sub>1</sub> = 7.3 Hz, *J*<sub>2</sub> = 2.2 Hz, 1H), 4.34 (s, 2H). <sup>13</sup>C{<sup>1</sup>H} NMR (125 MHz, CDCl<sub>3</sub>) δ 140.3, 136.1, 135.9, 132.7, 132.5, 129.9, 129.5, 129.0, 127.9, 127.64, 127.57, 127.5, 124.7, 122.6, 120.0, 119.5, 110.88, 110.87, 109.9, 31.1. IR (cm<sup>-1</sup>): 3426(N-H), 1614(Ar C=C), 1489(C-H), 1457(C-H), 1002(Ar-Br), 744(C-C), 692(C-C). HRMS(ESI) *m/z*: [M+H]<sup>+</sup> Calcd. for C<sub>21</sub>H<sub>17</sub>BrN<sup>+</sup> 362.0539, Found 362.0548.

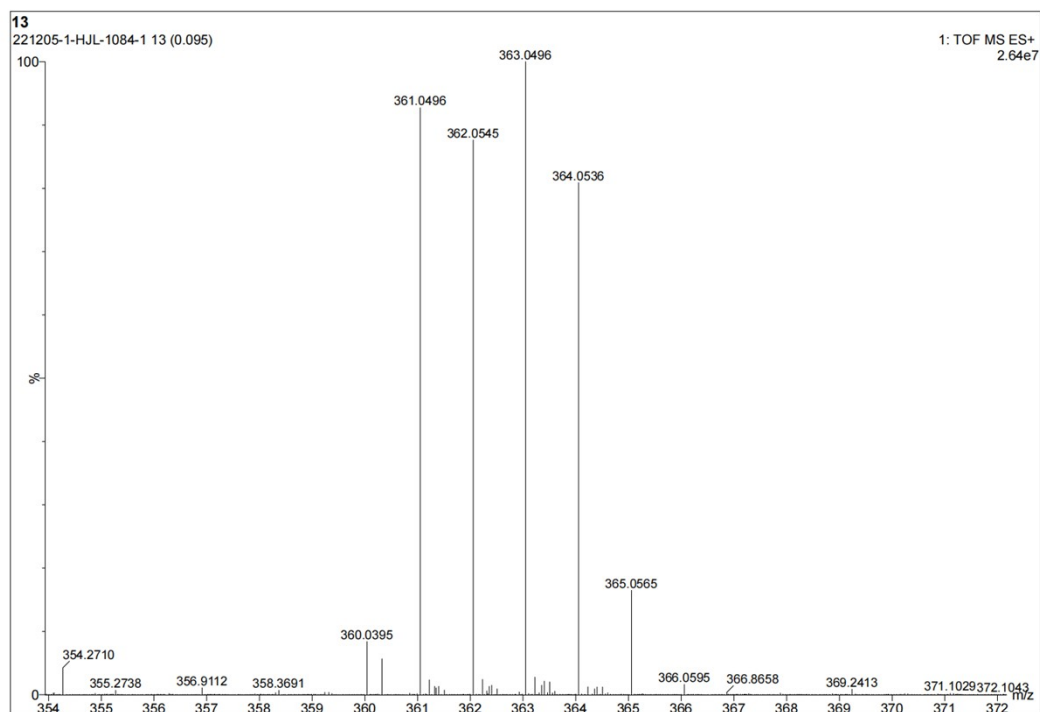

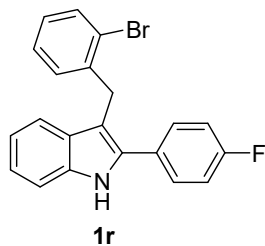

### 3-(2-bromobenzyl)-2-(4-fluorophenyl)-1*H*-indole (**1r**)<sup>1</sup>

Flash column chromatography on a silica gel (PE/EA, v/v, 30:1) gives **1r** (865 mg, 46% yield) as a yellow solid: m.p. 116-117 °C; <sup>1</sup>H NMR (500 MHz, CDCl<sub>3</sub>) δ 8.14 (s, 1H), 7.62 (dd, *J*<sub>1</sub> = 7.6 Hz, *J*<sub>2</sub> = 1.6 Hz, 1H), 7.41 (m, 4H), 7.24 (m, 1H), 7.14 – 7.05 (m, 5H), 6.99 (dd, *J*<sub>1</sub> = 7.3 Hz, *J*<sub>2</sub> = 2.1 Hz, 1H), 4.27 (s, 2H). <sup>13</sup>C {<sup>1</sup>H} NMR (125 MHz, CDCl<sub>3</sub>) δ 163.5, 161.5, 140.1, 136.0, 135.0, 132.6, 129.8, 129.43, 129.39, 129.36, 128.8 (d, *J*<sub>C-F</sub> = 3.4 Hz), 127.6, 127.5, 124.7, 122.7, 120.1, 119.5, 116.1 (d, *J*<sub>C-F</sub> = 21.6 Hz), 110.9, 110.0, 31.0. <sup>19</sup>F NMR (471 MHz, CDCl<sub>3</sub>) δ -113.4. IR (cm<sup>-1</sup>): 3464(N-H), 3063(Ar-H), 2985(C-H), 1613(Ar C=C), 1441(C-H), 1398(C-H), 1215(Ar-F), 1024(Ar-Br), 839(C-C), 745(C-C). HRMS(ESI) *m/z*: [M+H]<sup>+</sup> Calcd. for C<sub>21</sub>H<sub>16</sub>BrFN<sup>+</sup> 380.0445, Found 380.0446.

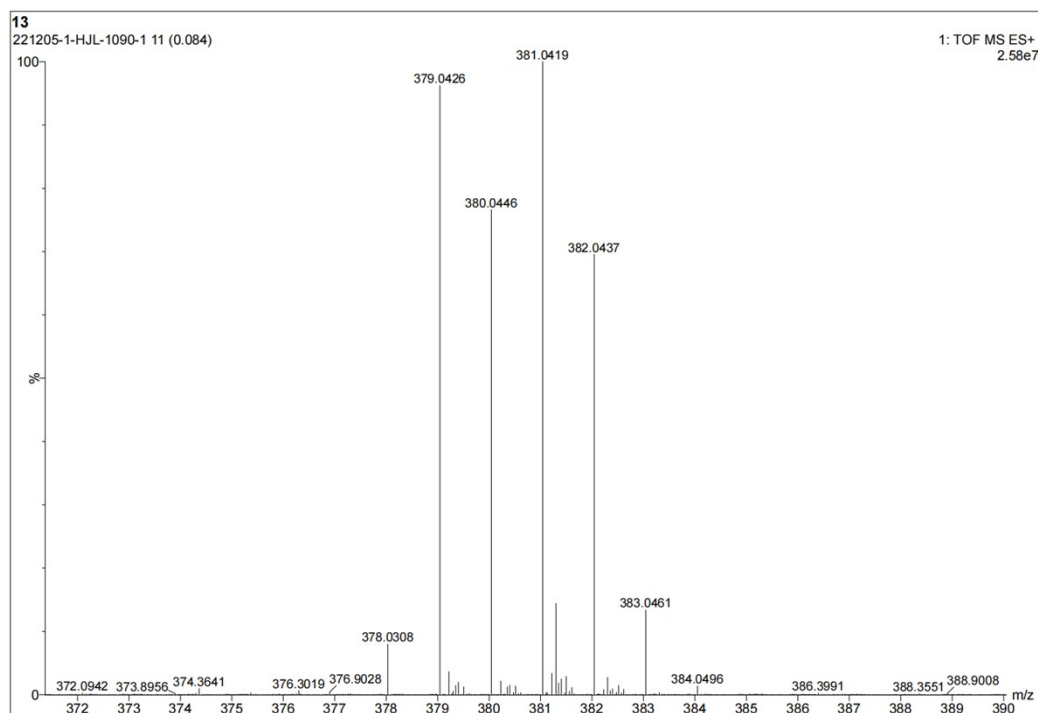

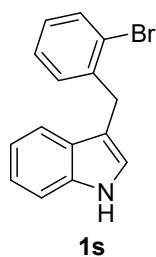

### 3-(2-bromobenzyl)-1H-indole (**1s**)<sup>3</sup>

Flash column chromatography on a silica gel (PE/EA, v/v, 30:1) gives **1p** (266.3 mg, 93% yield) as a faint yellow oil; <sup>1</sup>H NMR (500 MHz, CDCl<sub>3</sub>) δ 7.99 (s, 1H), 7.57 (dd,  $J_1 = 15.4$ ,  $J_2 = 7.8$  Hz, 2H), 7.38 (d,  $J = 8.2$  Hz, 1H), 7.23 – 7.16 (m, 3H), 7.13 – 7.05 (m, 2H), 6.98 – 6.92 (m, 1H), 4.23 (s, 2H). <sup>13</sup>C{<sup>1</sup>H} NMR (125 MHz, CDCl<sub>3</sub>) δ 140.4, 136.4, 132.7, 130.6, 127.6, 127.43, 127.39, 124.6, 122.8, 122.1, 119.5, 119.2, 114.1, 111.1, 31.9. IR (cm<sup>-1</sup>): 3416(N-H), 3057(C=CH), 1592(C=C), 1441(C-H), 1107(C-N), 1044(Ar-Br), 740(C-C). HRMS(ESI) m/z: [M+H]<sup>+</sup> Calcd. for C<sub>15</sub>H<sub>13</sub>BrN<sup>+</sup> 286.0226; Found 286.0229.

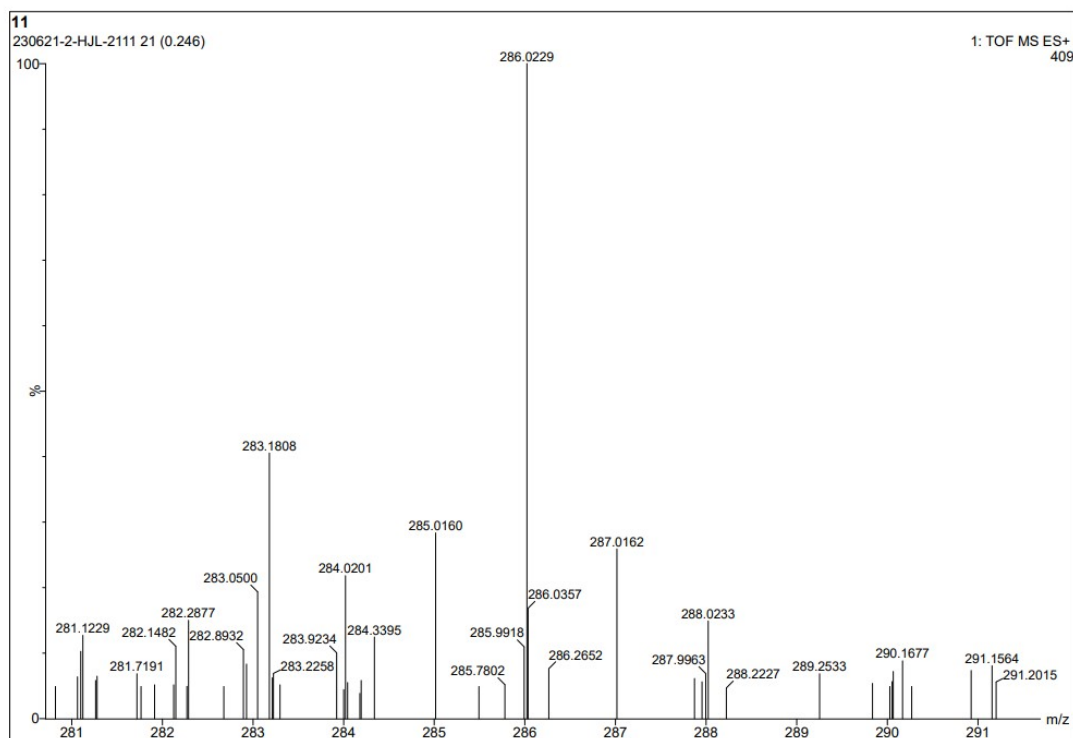

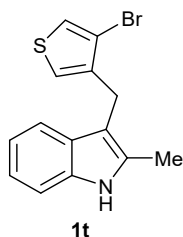

### 3-((4-bromothiophen-3-yl)methyl)-2-methyl-1H-indole (**1t**)

Flash column chromatography on a silica gel (PE/EA, v/v, 60:1) gives **1t** (320.3 mg, 87% yield) as a yellow oil;  $^1\text{H}$  NMR (500 MHz,  $\text{CDCl}_3$ )  $\delta$  7.76 (s, 1H), 7.44 (d,  $J = 7.8$  Hz, 1H), 7.27 (d,  $J = 8.4$  Hz, 1H), 7.12 (t,  $J = 7.5$  Hz, 1H), 7.09 – 7.03 (m, 2H), 6.62 (d,  $J = 5.7$  Hz, 1H), 4.00 – 3.94 (m, 2H), 2.39 (s, 3H).  $^{13}\text{C}\{^1\text{H}\}$  NMR (125 MHz,  $\text{CDCl}_3$ )  $\delta$  141.1, 135.2, 131.6, 128.8, 128.6, 125.1, 121.2, 119.4, 118.3, 110.2, 109.7, 108.3, 24.4, 11.9. IR ( $\text{cm}^{-1}$ ): 3389(N-H), 3169(C-H), 1654(Ar C=C), 1402(C-H), 1085(Ar-Br), 928(C-C), 746(C-C). HRMS(ESI)  $m/z$ :  $[\text{M}+\text{H}]^+$  Calcd. for  $\text{C}_{14}\text{H}_{13}\text{BrNS}^+$  305.9947, Found 305.9948.

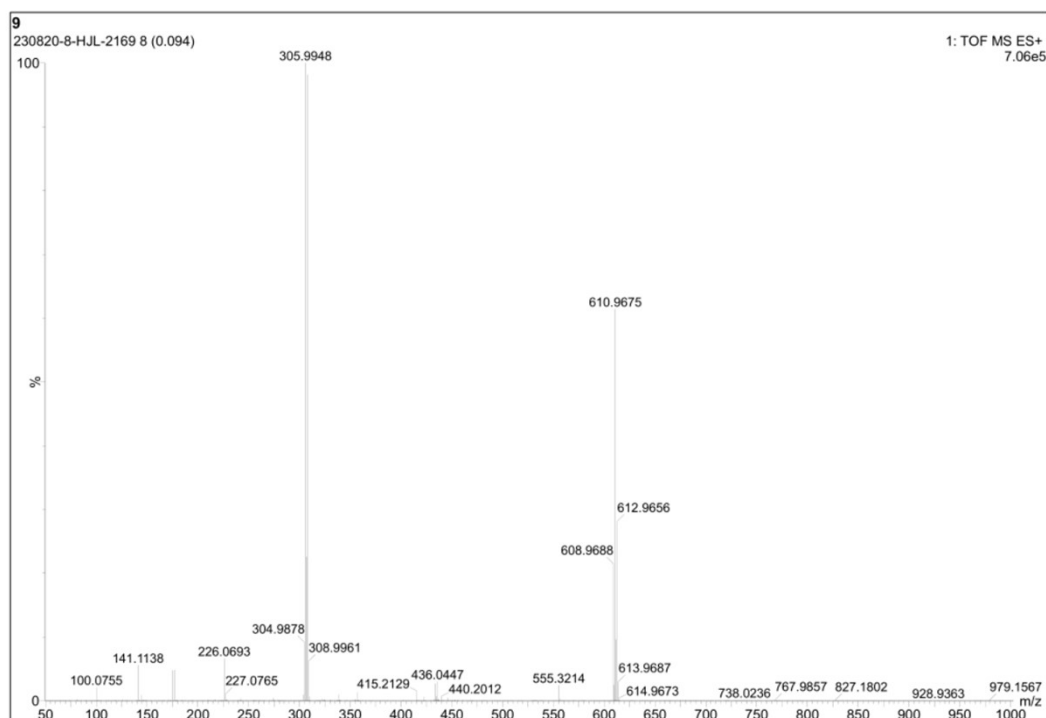

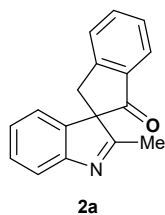

### 2'-methylspiro[indene-2,3'-indol]-1(3*H*)-one (**2a**)

Flash column chromatography on a silica gel (PE/EA, v/v, 4:1) gives **2a** (19.8 mg, 80% yield) as a yellow solid: m.p. 149-150 °C; <sup>1</sup>H NMR (500 MHz, CDCl<sub>3</sub>) δ 7.85 (d, *J* = 7.7 Hz, 1H), 7.74 (t, *J* = 7.5, 1H), 7.66 – 7.59 (m, 2H), 7.52 – 7.44 (m, 1H), 7.35 (td, *J*<sub>1</sub> = 7.6 Hz, *J*<sub>2</sub> = 1.2 Hz, 1H), 7.13 (td, *J*<sub>1</sub> = 7.5 Hz, *J*<sub>2</sub> = 1.1 Hz, 1H), 7.00 (d, *J* = 7.5 Hz, 1H), 3.62 (d, *J* = 17.7 Hz, 1H), 3.49 (d, *J* = 17.7 Hz, 1H), 2.16 (s, 3H). <sup>13</sup>C{<sup>1</sup>H} NMR (125 MHz, CDCl<sub>3</sub>) δ 200.3, 179.3, 156.4, 152.7, 140.6, 136.4, 135.8, 128.7, 128.2, 126.9, 125.8, 125.4, 121.1, 120.3, 72.4, 35.2, 16.4. IR (cm<sup>-1</sup>): 2986(C-H), 1663(C=O), 1614(C=N), 1614(Ar C=C), 1441(C-H), 1174(C-N), 776(C-C). HRMS(ESI) *m/z*: [M+H]<sup>+</sup> Calcd. for C<sub>17</sub>H<sub>14</sub>NO<sup>+</sup> 248.1070, Found 248.1076.

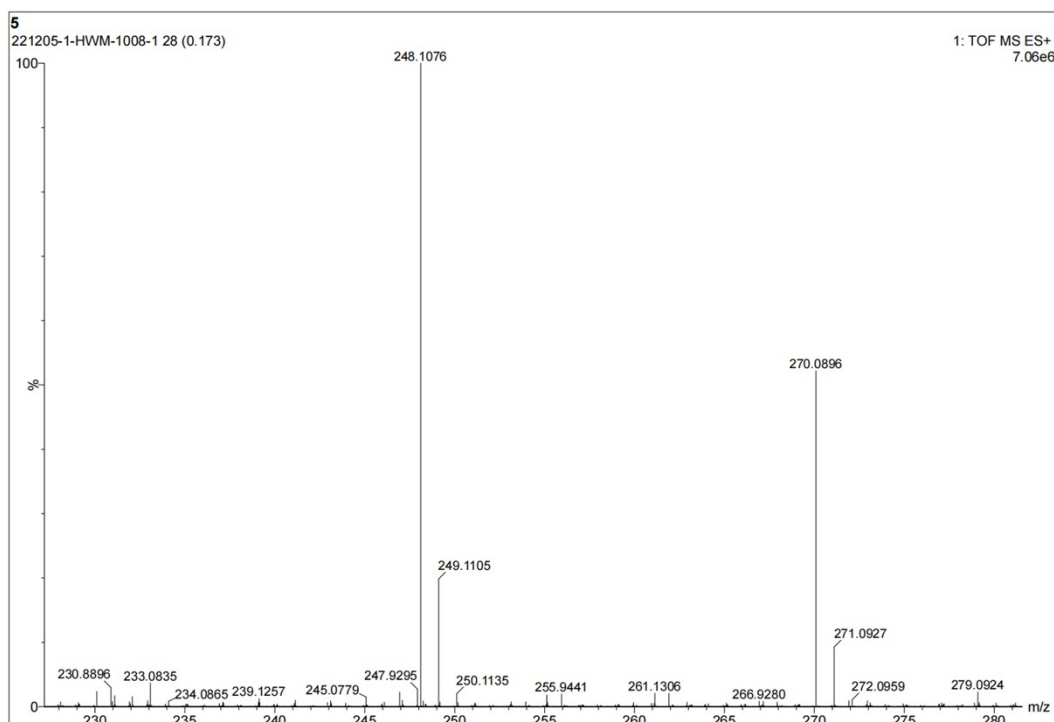

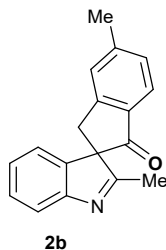

### 2',5-dimethylspiro[indene-2,3'-indol]-1(3H)-one (**2b**)

Flash column chromatography on a silica gel (PE/EA, v/v, 4:1) gives **2b** (19.6 mg, 75% yield) as a yellow solid: m.p. 126-127 °C; <sup>1</sup>H NMR (500 MHz, CDCl<sub>3</sub>) <sup>1</sup>H NMR (500 MHz, Chloroform-*d*) δ 7.73 (d, *J* = 7.8 Hz, 1H), 7.59 (d, *J* = 7.7 Hz, 1H), 7.44 (s, 1H), 7.36 – 7.28 (m, 2H), 7.12 (t, *J* = 7.5 Hz, 1H), 7.00 (d, *J* = 7.3 Hz, 1H), 3.56 (d, *J* = 17.6 Hz, 1H), 3.43 (d, *J* = 17.6 Hz, 1H), 2.52 (s, 3H), 2.15 (s, 3H). <sup>13</sup>C{<sup>1</sup>H} NMR (125 MHz, CDCl<sub>3</sub>) δ 199.7, 179.6, 156.4, 153.3, 147.4, 140.8, 134.2, 129.6, 128.6, 127.3, 125.8, 125.3, 121.1, 120.3, 72.6, 35.1, 22.2, 16.4. IR (cm<sup>-1</sup>): 2983(C-H), 1705(C=O), 1613(Ar C=C), 1613(C=N), 1440(C-H), 1174(C-N), 775(C-C). HRMS(ESI) *m/z*: [M+H]<sup>+</sup> Calcd. for C<sub>18</sub>H<sub>16</sub>NO<sup>+</sup> 262.1226, Found 262.1234.

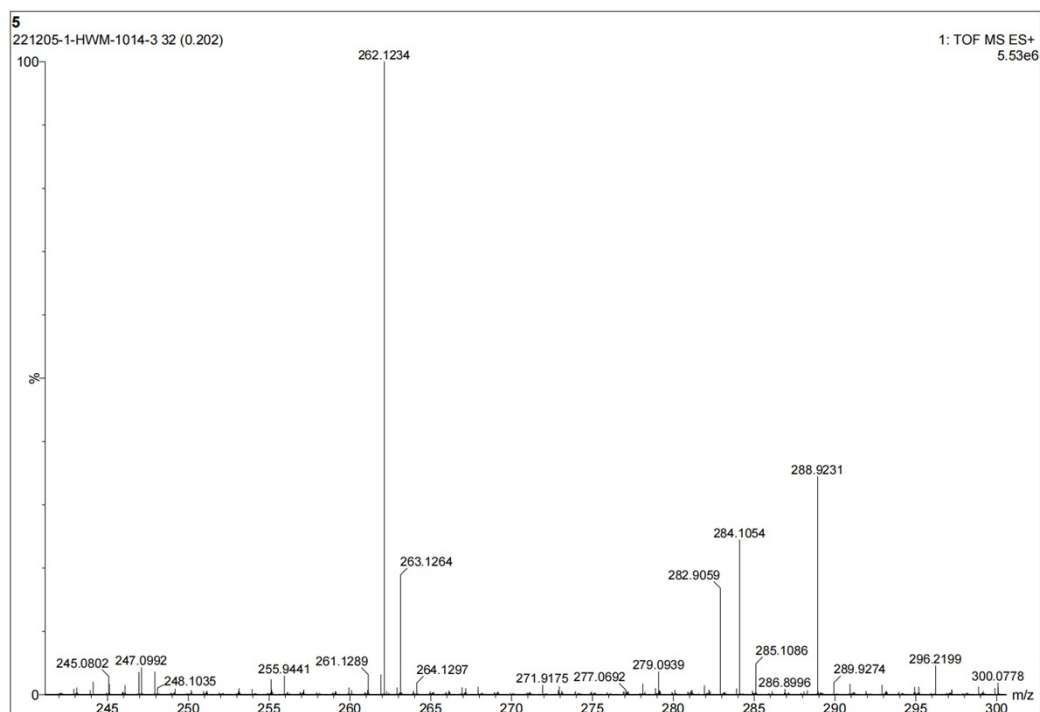

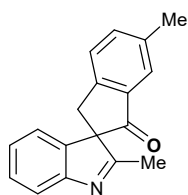

**2c**

**2',6-dimethylspiro[indene-2,3'-indol]-1(3H)-one (2c)**

Flash column chromatography on a silica gel (PE/EA, v/v, 4:1) gives **2c** (20.4 mg, 78% yield) as a yellow solid: m.p. 148-149 °C; <sup>1</sup>H NMR (500 MHz, CDCl<sub>3</sub>) δ 7.62 (s, 1H), 7.58 (d, *J* = 7.8 Hz, 1H), 7.56 – 7.50 (m, 2H), 7.34 – 7.30 (m, 1H), 7.11 (t, *J* = 7.5 Hz, 1H), 6.98 (d, *J* = 7.4 Hz, 1H), 3.54 (d, *J* = 17.5 Hz, 1H), 3.42 (d, *J* = 17.5 Hz, 1H), 2.45 (s, 3H), 2.14 (s, 3H). <sup>13</sup>C{<sup>1</sup>H} NMR (125 MHz, CDCl<sub>3</sub>) δ 200.4, 179.5, 156.4, 150.2, 140.8, 138.4, 137.1, 136.6, 128.6, 126.6, 125.8, 125.3, 121.1, 120.2, 72.8, 34.9, 21.1, 16.4. IR (cm<sup>-1</sup>): 2986(C-H), 1689(C=O), 1613(Ar C=C), 1558(C=N), 1441(C-H), 1174(C-N), 1007(C-C), 800(C-C). HRMS(ESI) *m/z*: [M+H]<sup>+</sup> Calcd. for C<sub>18</sub>H<sub>16</sub>NO<sup>+</sup> 262.1226, Found 262.1235.

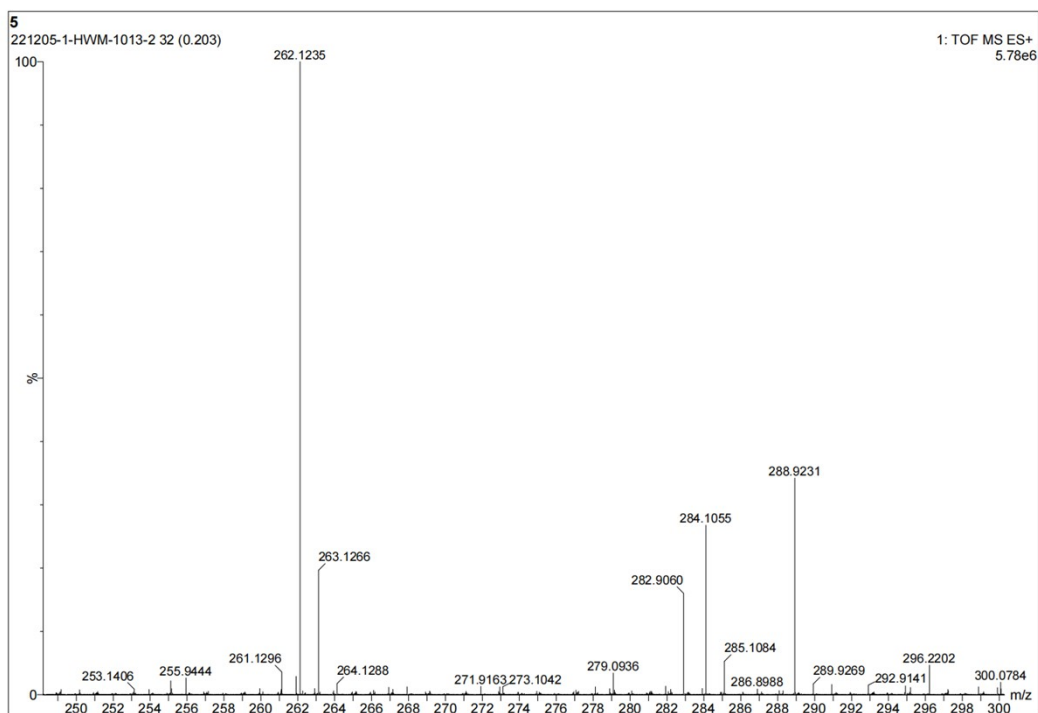

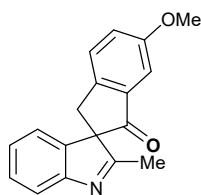

**2d**

**6-methoxy-2'-methylspiro[indene-2,3'-indol]-1(3H)-one (2d)**

Flash column chromatography on a silica gel (PE/EA, v/v, 4:1) gives **2d** (22.7 mg, 82% yield) as a yellow solid: m.p. 183-184 °C; <sup>1</sup>H NMR (500 MHz, CDCl<sub>3</sub>) δ 7.58 (d, *J* = 7.7 Hz, 1H), 7.51 (d, *J* = 8.4 Hz, 1H), 7.35 – 7.30 (m, 2H), 7.25 (d, *J* = 2.5 Hz, 1H), 7.12 (t, *J* = 7.5 Hz, 1H), 7.00 (d, *J* = 7.4 Hz, 1H), 3.85 (s, 3H), 3.51 (d, *J* = 17.3 Hz, 1H), 3.39 (d, *J* = 17.3 Hz, 1H), 2.14 (s, 3H). <sup>13</sup>C{<sup>1</sup>H} NMR (125 MHz, CDCl<sub>3</sub>) δ 200.3, 179.4, 160.1, 156.4, 145.6, 140.7, 137.7, 128.7, 127.6, 125.8, 125.3, 121.1, 120.3, 106.4, 73.2, 55.7, 34.5, 16.4. IR (cm<sup>-1</sup>): 2922(C-H), 1703(C=O), 1613(Ar C=C), 1580(C=N), 1434(C-H), 1172(C-N), 1024(C-O-C), 847(C-C), 779(C-C). HRMS(ESI) *m/z*: [M+H]<sup>+</sup> Calcd. for C<sub>18</sub>H<sub>16</sub>NO<sub>2</sub><sup>+</sup> 278.1176, Found 278.1184.

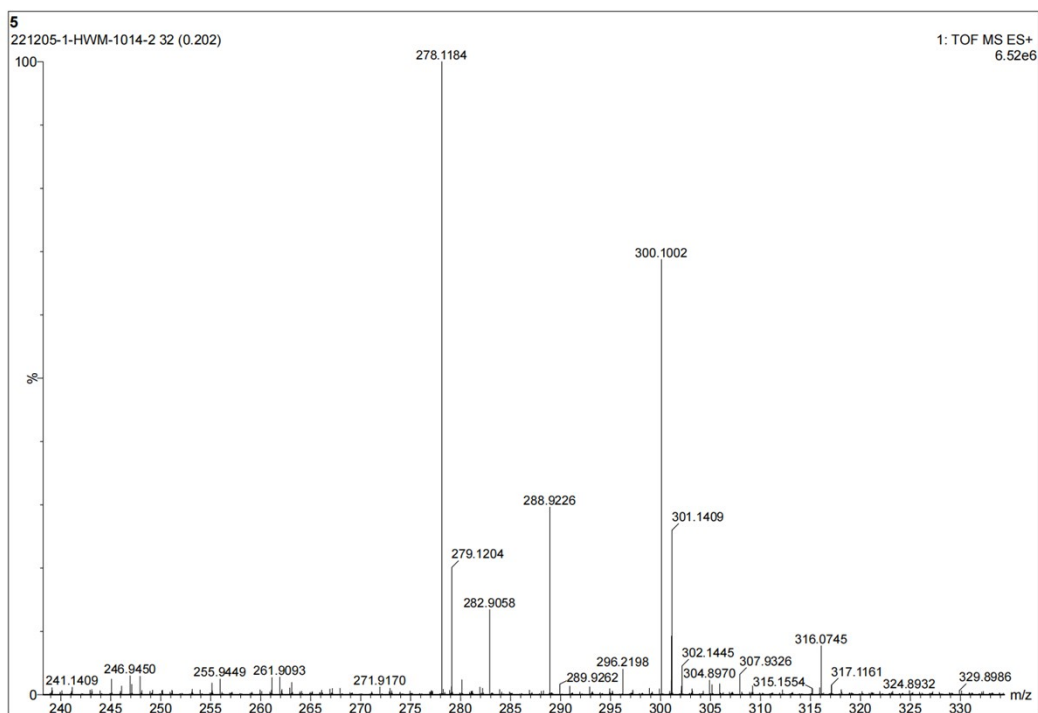



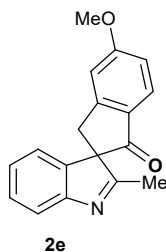

### 5-methoxy-2'-methylspiro[indene-2,3'-indol]-1(3H)-one (**2e**)

Flash column chromatography on a silica gel (PE/EA, v/v, 4:1) gives **2e** (22.2 mg, 80% yield) as a yellow oil;  $^1\text{H}$  NMR (500 MHz,  $\text{CDCl}_3$ )  $\delta$  7.77 (d,  $J = 8.5$  Hz, 1H), 7.59 (d,  $J = 7.7$  Hz, 1H), 7.34 (td,  $J_1 = 7.6$  Hz,  $J_2 = 1.2$  Hz, 1H), 7.13 (t,  $J = 7.5$  Hz, 1H), 7.05 (s, 1H), 7.03 – 6.99 (m, 2H), 3.95 (s, 3H), 3.55 (d,  $J = 17.6$  Hz, 1H), 3.43 (d,  $J = 17.6$  Hz, 1H), 2.16 (s, 3H).  $^{13}\text{C}\{^1\text{H}\}$  NMR (125 MHz,  $\text{CDCl}_3$ )  $\delta$  198.3, 179.7, 166.2, 156.3, 155.9, 140.9, 129.6, 128.6, 127.1, 125.8, 121.1, 120.2, 116.3, 110.1, 72.7, 55.9, 35.2, 16.3. IR ( $\text{cm}^{-1}$ ): 2987(C-H), 1705(C=O), 1613(Ar C=C), 1613(C=N), 1441(C-H), 1174(C-N), 1003(C-O-C), 780(C-C). HRMS(ESI)  $m/z$ :  $[\text{M}+\text{H}]^+$  Calcd. for  $\text{C}_{18}\text{H}_{16}\text{NO}_2^+$  278.1176, Found 278.1186.

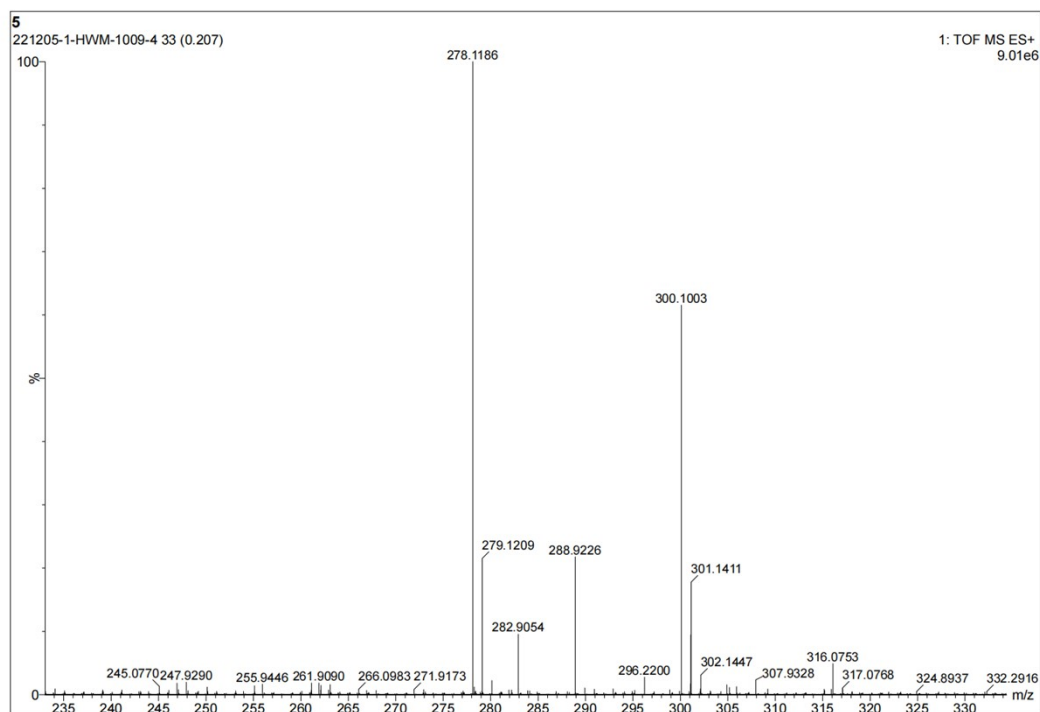

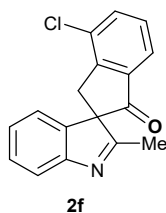

#### 4-chloro-2'-methylspiro[indene-2,3'-indol]-1(3H)-one (**2f**)

Flash column chromatography on a silica gel (PE/EA, v/v, 4:1) gives **2f** (13.8 mg, 49% yield) as a yellowish solid: m.p. 101-102 °C; <sup>1</sup>H NMR (500 MHz, CDCl<sub>3</sub>) δ 7.76-7.73 (m, 2H), 7.61 (d, *J* = 7.8 Hz, 1 H), 7.48 (t, *J* = 7.7 Hz, 1H), 7.36 (dt, *J*<sub>1</sub> = 7.7 Hz, *J*<sub>2</sub> = 1.2 Hz, 1H), 7.15 (t, *J* = 7.5 Hz, 1H), 7.0 (d, *J* = 7.5 Hz, 1H), 3.59 (d, *J* = 18.3 Hz, 1H), 3.48 (d, *J* = 18.3 Hz, 1H), 2.17 (s, 3H). <sup>13</sup>C{<sup>1</sup>H} NMR (125 MHz, CDCl<sub>3</sub>) δ 199.4, 178.6, 156.3, 150.3, 140.2, 138.2, 135.4, 133.2, 129.9, 128.9, 126.0, 123.6, 121.1, 120.4, 72.1, 34.1, 16.4. IR (cm<sup>-1</sup>): 2986(Ar-H), 1655(C=O), 1614(C=N), 1614(Ar C=C), 1441(C-H), 1051(C-Cl), 788(C-C). HRMS(ESI) *m/z*: [M+H]<sup>+</sup> Calcd. for C<sub>17</sub>H<sub>13</sub>ClNO<sup>+</sup> 282.0680, Found 282.0686.

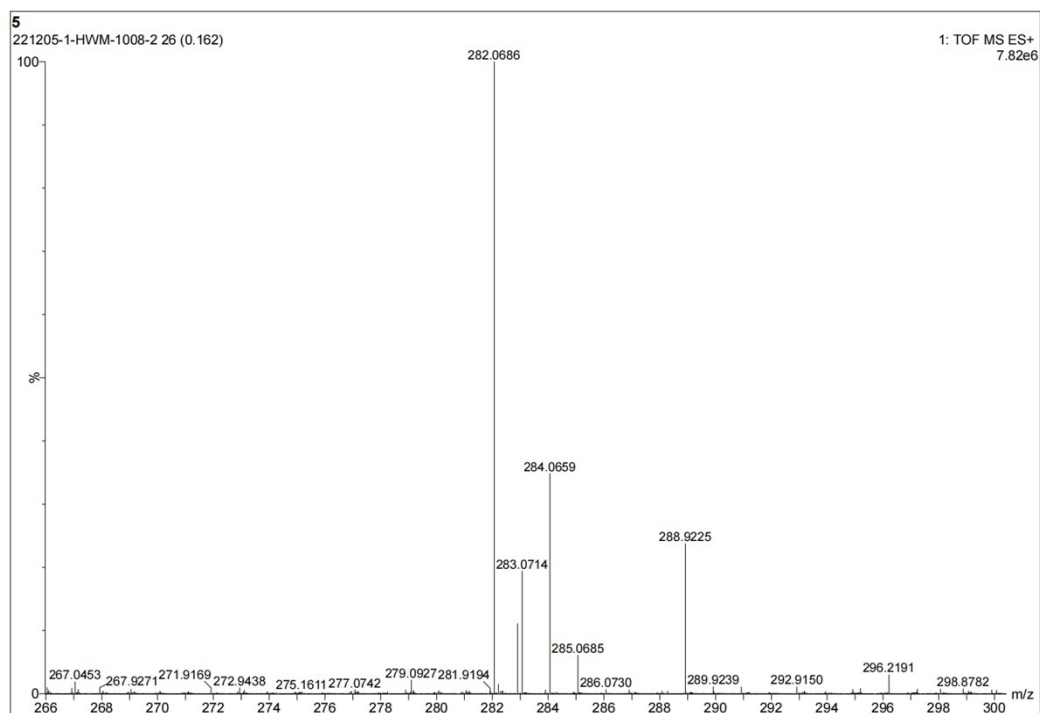

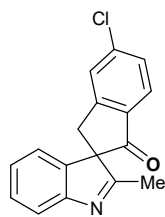

**2g**

**6-chloro-2'-methylspiro[indene-2,3'-indol]-1(3H)-one (2g)**

Flash column chromatography on a silica gel (PE/EA, v/v, 4:1) gives **2g** (15.7 mg, 56% yield) as a yellowish solid: m.p. 142-143 °C; <sup>1</sup>H NMR (500 MHz, CDCl<sub>3</sub>) δ 7.76 (d, *J* = 8.2 Hz, 1H), 7.64 (s, 1H), 7.59 (d, *J* = Hz, 1H), 7.48-7.46 (m, 1H), 7.34 (dt, *J*<sub>1</sub> = 7.6 Hz, *J*<sub>2</sub> = 1.2 Hz, 1H), 7.12 (dt, *J*<sub>1</sub> = 8.7 Hz, *J*<sub>2</sub> = 1.1 Hz, 1H), 6.98 (d, *J* = 7.4 Hz, 1H), 3.57 (d, *J* = 17.9 Hz, 1H), 3.45 (d, *J* = 17.9 Hz, 1H), 2.15 (s, 3H). <sup>13</sup>C{<sup>1</sup>H} NMR (125 MHz, CDCl<sub>3</sub>) δ 198.8, 178.7, 156.3, 154.1, 142.5, 140.2, 134.8, 129.1, 128.8, 127.1, 126.3, 125.9, 121.0, 120.3, 72.3, 34.8, 16.3. IR (cm<sup>-1</sup>): 2987(Ar-H), 1655(C=O), 1615(C=N), 1615(Ar C=C), 1439(C-H), 1067(C-Cl), 744(C-C). HRMS(ESI) *m/z*: [M+H]<sup>+</sup> Calcd. for C<sub>17</sub>H<sub>13</sub>ClNO<sup>+</sup> 282.0680, Found 282.0689.

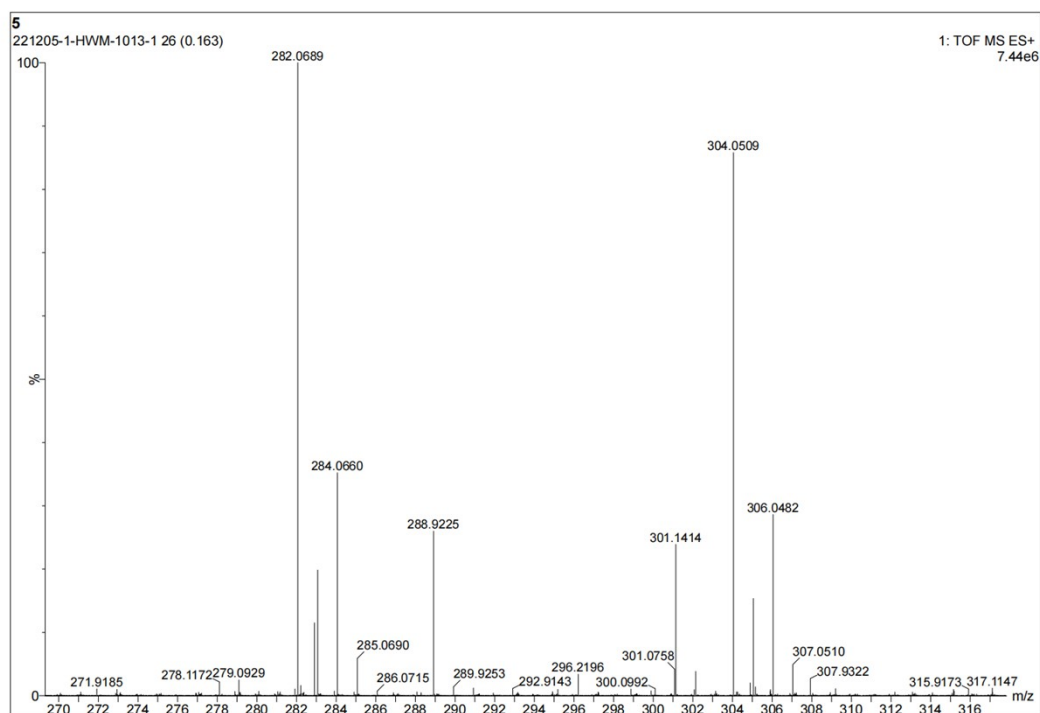

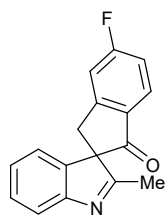

2h

### 5-fluoro-2'-methylspiro[indene-2,3'-indol]-1(3H)-one (2h)

Flash column chromatography on a silica gel (PE/EA, v/v, 4:1) gives **2h** (11.9 mg, 45% yield) as a yellow solid: m.p. 138-139 °C;  $^1\text{H}$  NMR (500 MHz,  $\text{CDCl}_3$ )  $\delta$  7.84 (dd,  $J_1 = 8.5$  Hz,  $J_2 = 5.2$  Hz, 1H), 7.59 (d,  $J = 7.8$  Hz, 1H), 7.36 – 7.29 (m, 2H), 7.19 (t,  $J = 8.6$  Hz, 1H), 7.13 (t,  $J = 7.5$  Hz, 1H), 6.99 (d,  $J = 7.5$  Hz, 1H), 3.58 (d,  $J = 17.9$  Hz, 1H), 3.45 (d,  $J = 17.9$  Hz, 1H), 2.15 (s, 3H).  $^{13}\text{C}\{^1\text{H}\}$  NMR (125 MHz,  $\text{CDCl}_3$ )  $\delta$  198.4, 178.9, 167.7 (d,  $J_{\text{C-F}} = 257.3$  Hz), 156.3, 155.7 (d,  $J_{\text{C-F}} = 10.2$  Hz), 140.4, 132.8, 128.8, 127.7 (d,  $J_{\text{C-F}} = 10.7$  Hz), 125.9, 121.0, 120.4, 116.8 (d,  $J_{\text{C-F}} = 23.7$  Hz), 113.7 (d,  $J_{\text{C-F}} = 22.6$  Hz), 72.5, 35.0 (d,  $J_{\text{C-F}} = 2.3$  Hz), 16.4.  $^{19}\text{F}$  NMR (471 MHz,  $\text{CDCl}_3$ )  $\delta$  -100.3. IR ( $\text{cm}^{-1}$ ): 2981(C-H), 1708(C=O), 1614(C=N), 1592(Ar C=C), 1454(C-H), 1250(C-F), 1174(C-N), 774(C-C). HRMS(ESI) m/z:  $[\text{M}+\text{H}]^+$  Calcd. for  $\text{C}_{17}\text{H}_{13}\text{FNO}^+$  266.0976, Found 266.0985.

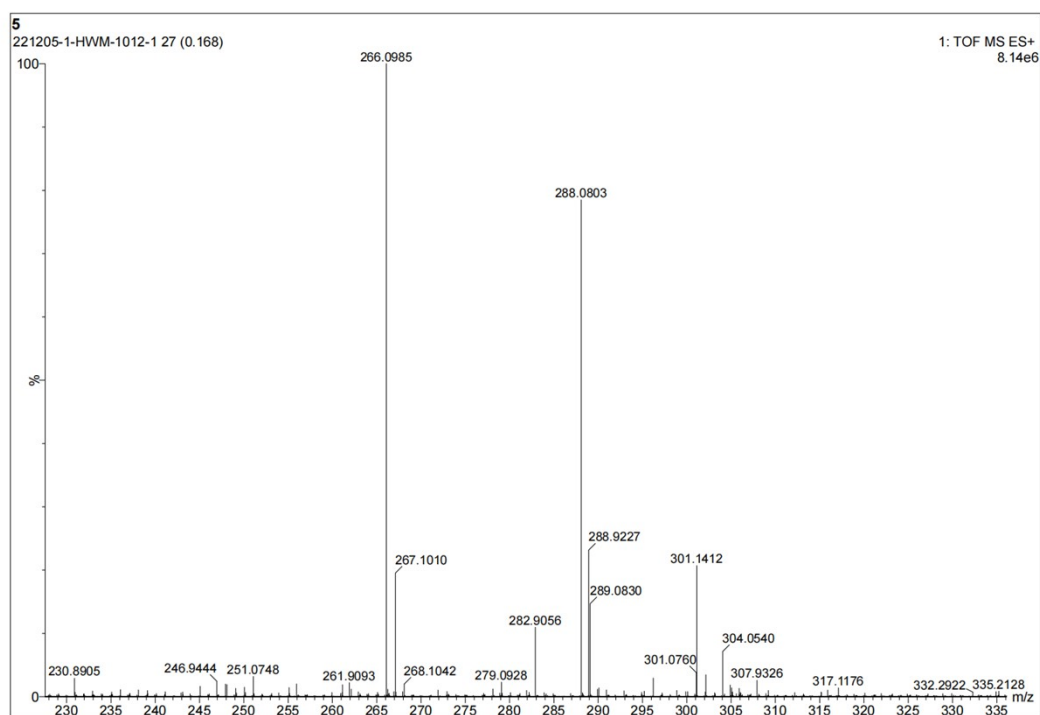

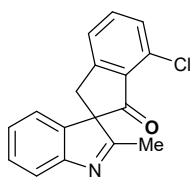

2i

### 7-chloro-2'-methylspiro[indene-2,3'-indol]-1(3H)-one (2i)

Flash column chromatography on a silica gel (PE/EA, v/v, 4:1) gives **2i** (9.8 mg, 35% yield) as a yellow oil;  $^1\text{H}$  NMR (500 MHz,  $\text{CDCl}_3$ )  $\delta$  7.64-7.52 (m, 3H), 7.44 (d,  $J = 7.6$  Hz, 1H), 7.34 (dt,  $J_1 = 7.7$  Hz,  $J_2 = 1.3$  Hz, 1H), 7.12 (t,  $J = 7.6$  Hz, 1H), 6.98 (d,  $J = 7.4$  Hz, 1H), 3.58 (d,  $J = 17.7$  Hz, 1H), 3.42 (d,  $J = 17.7$  Hz, 1H), 2.18 (s, 3H).  $^{13}\text{C}\{^1\text{H}\}$  NMR (125 MHz,  $\text{CDCl}_3$ )  $\delta$  196.8, 178.8, 156.2, 154.8, 140.4, 135.9, 133.4, 132.4, 129.9, 128.8, 125.8, 125.2, 121.0, 120.3, 72.7, 34.4, 16.5. IR ( $\text{cm}^{-1}$ ): 2974(Ar-H), 1655(C=O), 1604(C=N), 1604(Ar C=C), 1452(C-H), 1050(C-Cl), 776(C-C). HRMS(ESI)  $m/z$ :  $[\text{M}+\text{H}]^+$  Calcd. for  $\text{C}_{17}\text{H}_{13}\text{ClNO}^+$  282.0680, Found 282.0683.

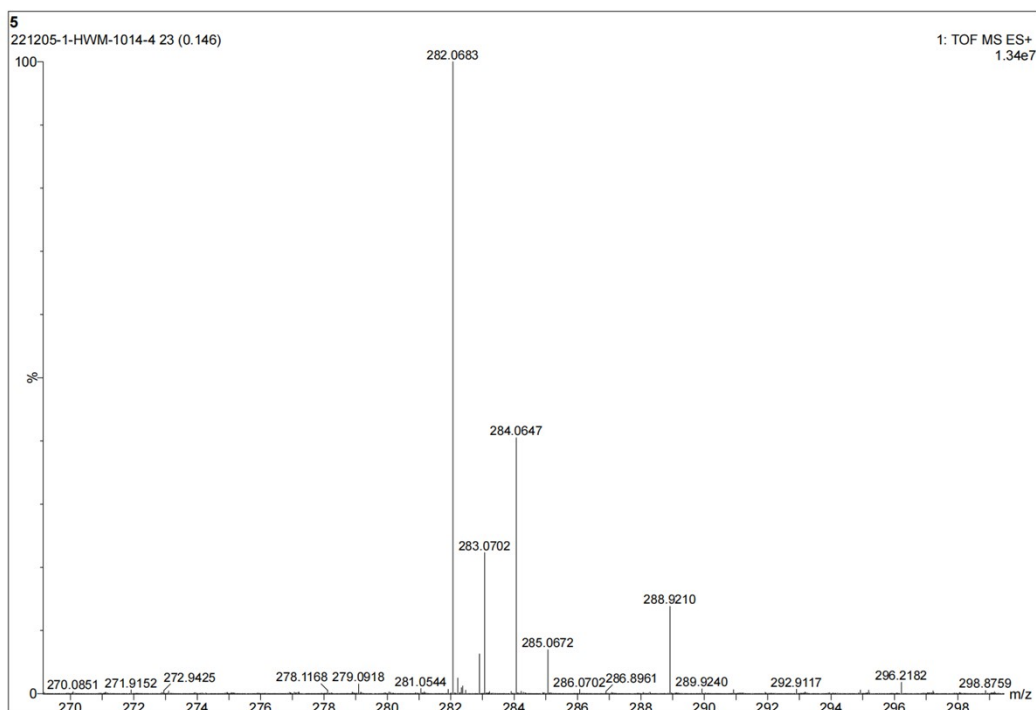

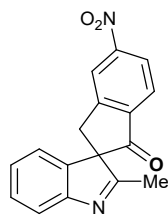

**2j**

**2'-methyl-5-nitrospiro[indene-2,3'-indol]-1(3H)-one (2j)**

Flash column chromatography on a silica gel (PE/EA, v/v, 4:1) gives **2j** (12.8 mg, 44% yield) as a yellowish solid: mp 182-183 °C; <sup>1</sup>H NMR (500 MHz, CDCl<sub>3</sub>) δ 8.51 (s, 1H), 8.36-8.33 (m, 1H), 7.99 (d, *J* = 8.3 Hz, 1H), 7.61 (d, *J* = 7.8 Hz, 1H), 7.39-7.36 (m, 1H), 7.15 (t, *J* = 7.15 Hz, 1H), 6.97 (d, *J* = 7.4 Hz, 1H), 3.59 (d, *J* = 18.0 Hz, 1H), 3.72 (d, *J* = 18.0 Hz, 1H), 2.17 (s, 3H). <sup>13</sup>C{<sup>1</sup>H} NMR (125 MHz, CDCl<sub>3</sub>) δ 198.8, 177.9, 156.2, 153.4, 152.4, 140.3, 139.7, 129.2, 126.3, 126.1, 123.7, 122.3, 120.9, 120.6, 72.6, 35.0, 16.5. IR (cm<sup>-1</sup>): 2986(Ar-H), 1655(C=O), 1614(C=N), 1614(Ar C=C), 1491(Ar C-NO<sub>2</sub>), 1352(Ar C-NO<sub>2</sub>), 1441(C-H), 1174(C-N), 788(C-C). HRMS(ESI) m/z: [M+H]<sup>+</sup> Calcd. for C<sub>17</sub>H<sub>13</sub>N<sub>2</sub>O<sub>3</sub><sup>+</sup> 293.0921, Found 293.0929.

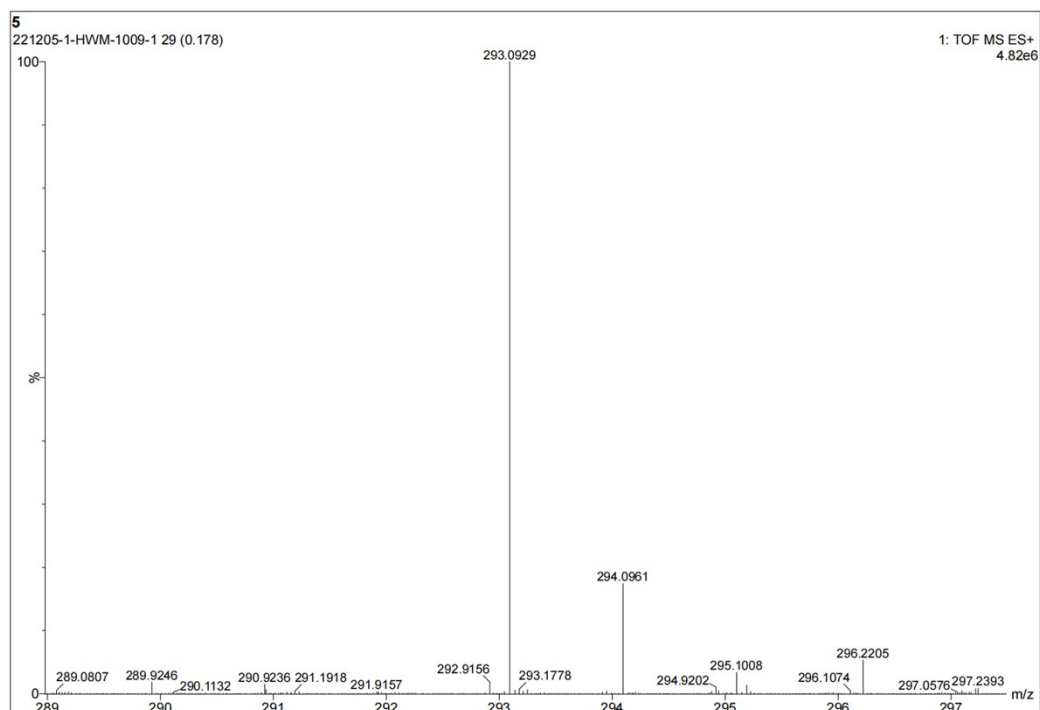

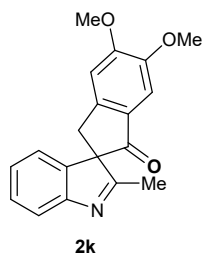

### 5,6-dimethoxy-2'-methylspiro[indene-2,3'-indol]-1(3H)-one (**2k**)

Flash column chromatography on a silica gel (PE/EA, v/v, 4:1) gives **2k** (25.5 mg, 83% yield) as a yellow oil;  $^1\text{H}$  NMR (500 MHz,  $\text{CDCl}_3$ )  $\delta$  7.60 (d,  $J = 7.8$  Hz, 1H), 7.34 (dt,  $J_1 = 7.6$  Hz,  $J_2 = 1.3$  Hz, 1H), 7.24 (s, 1H), 7.14 (t,  $J = 7.5$  Hz, 1H), 7.04-7.02 (m, 2H), 4.04 (s, 3H), 3.94 (s, 3H), 3.51 (d,  $J = 17.5$  Hz, 1H), 3.40 (d,  $J = 17.5$  Hz, 1H), 2.15 (s, 3H).  $^{13}\text{C}\{^1\text{H}\}$  NMR (125 MHz,  $\text{CDCl}_3$ )  $\delta$  198.6, 179.7, 156.4, 156.3, 150.1, 148.2, 140.7, 129.3, 128.6, 125.8, 121.1, 120.2, 107.5, 105.5, 72.7, 56.4, 56.2, 34.9, 16.2. IR ( $\text{cm}^{-1}$ ): 2988(C-H), 1675(C=O), 1613(Ar C=C), 1613(C=N), 1441(C-H), 1174(C-N), 1003(C-O-C), 787(C-C). HRMS(ESI)  $m/z$ :  $[\text{M}+\text{H}]^+$  Calcd. for  $\text{C}_{19}\text{H}_{18}\text{NO}_3^+$  308.1281, Found 308.1286.

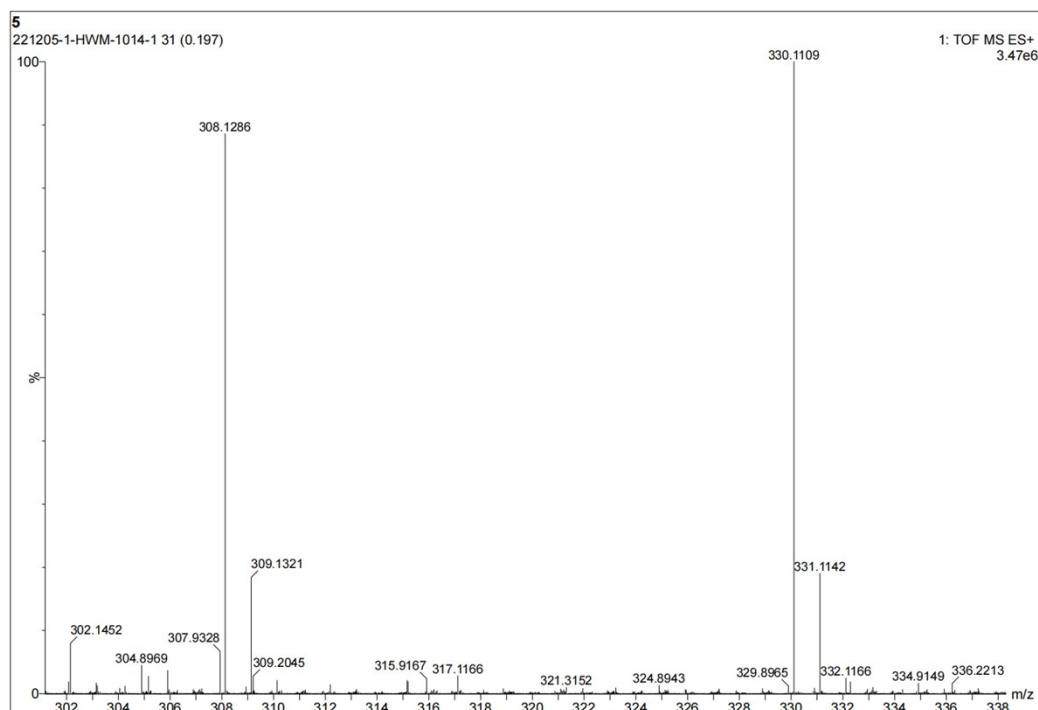

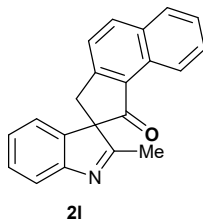

**2'-methylspiro[cyclopenta[a]naphthalene-2,3'-indol]-1(3H)-one (21)**

Flash column chromatography on a silica gel (PE/EA, v/v, 4:1) gives **21** (23.4 mg, 79% yield) as a yellow oil;  $^1\text{H}$  NMR (500 MHz,  $\text{CDCl}_3$ )  $\delta$  9.02 (d,  $J = 8.3$  Hz, 1H), 8.20 (d,  $J = 8.4$  Hz, 1H), 7.98 (d,  $J = 8.2$  Hz, 1H), 7.71-7.41 (m, 4H), 7.36 (dt,  $J_1 = 7.8$  Hz,  $J_2 = 1.3$  Hz, 1H), 7.13 (t,  $J = 7.5$  Hz, 1H), 7.03 (d,  $J = 7.4$  Hz, 1H), 3.71 (d,  $J = 18.1$  Hz, 1H), 3.59 (d,  $J = 18.0$  Hz, 1H), 2.19 (s, 3H)  $^{13}\text{C}\{^1\text{H}\}$  NMR (125 MHz,  $\text{CDCl}_3$ )  $\delta$  200.2, 179.5, 156.5, 156.4, 140.6, 137.0, 133.0, 130.8, 129.8, 129.6, 128.6, 128.3, 127.3, 125.8, 124.0, 123.7, 121.0, 120.2, 72.8, 35.4, 16.3. IR ( $\text{cm}^{-1}$ ): 2986(C-H), 1689(C=O), 1622(Ar C=C), 1613(C=N), 1454(C-H), 1174(C-N), 774(C-C). HRMS(ESI)  $m/z$ :  $[\text{M}+\text{H}]^+$  Calcd. for  $\text{C}_{21}\text{H}_{16}\text{NO}^+$  298.1226, Found 298.1234.

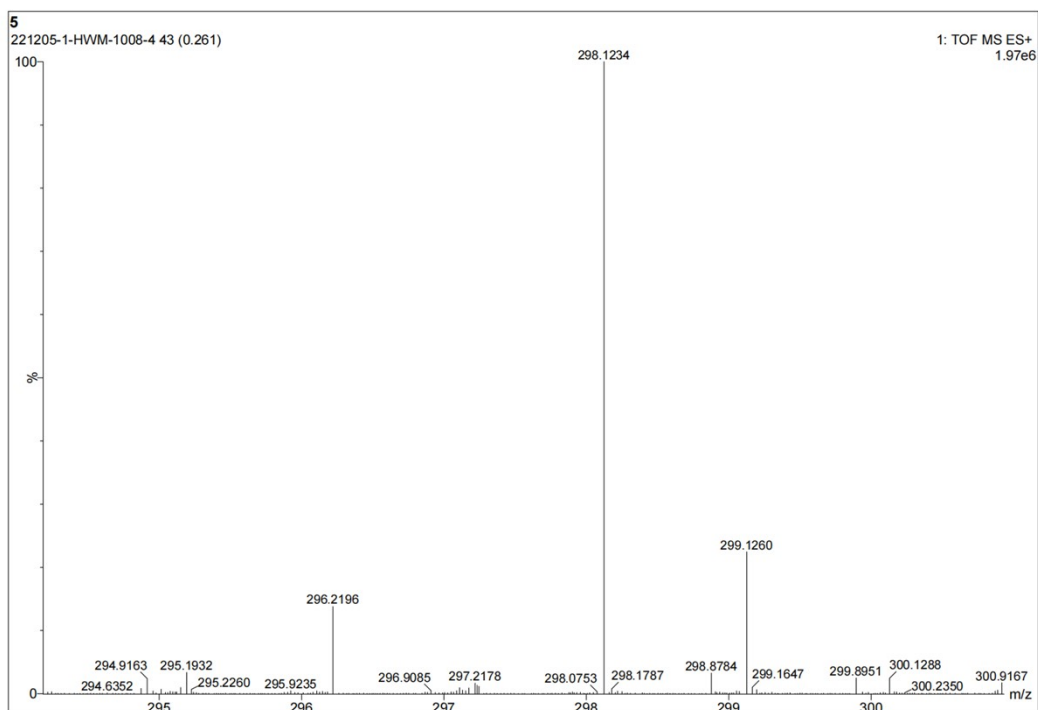



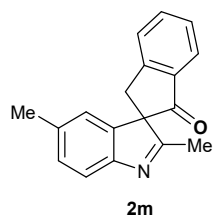

### 2',5'-dimethylspiro[indene-2,3'-indol]-1(3H)-one (**2m**)

Flash column chromatography on a silica gel (PE/EA, v/v, 4:1) gives **2m** (21.1 mg, 81% yield) as a yellow oil;  $^1\text{H}$  NMR (500 MHz,  $\text{CDCl}_3$ )  $\delta$  7.85 (d,  $J = 7.7$  Hz, 1H), 7.74 (t,  $J = 7.5$  Hz, 1H), 7.65 (d,  $J = 7.6$  Hz, 1H), 7.52 – 7.46 (m, 2H), 7.14 (d,  $J = 7.9$  Hz, 1H), 6.80 (s, 1H), 3.60 (d,  $J = 17.6$  Hz, 1H), 3.47 (d,  $J = 17.6$  Hz, 1H), 2.28 (s, 3H), 2.13 (s, 3H).  $^{13}\text{C}\{^1\text{H}\}$  NMR (125 MHz,  $\text{CDCl}_3$ )  $\delta$  200.7, 178.3, 154.2, 152.8, 140.8, 136.5, 135.78, 135.76, 129.3, 128.3, 126.9, 125.4, 121.9, 119.8, 72.3, 35.3, 21.3, 16.4. IR ( $\text{cm}^{-1}$ ): 2988(C-H), 1662(C=O), 1613(C=N), 1613(Ar C=C), 1441(C-H), 1174(C-N), 788(C-C). HRMS(ESI)  $m/z$ :  $[\text{M}+\text{H}]^+$  Calcd. for  $\text{C}_{18}\text{H}_{16}\text{NO}^+$  262.1226, Found 262.1235.

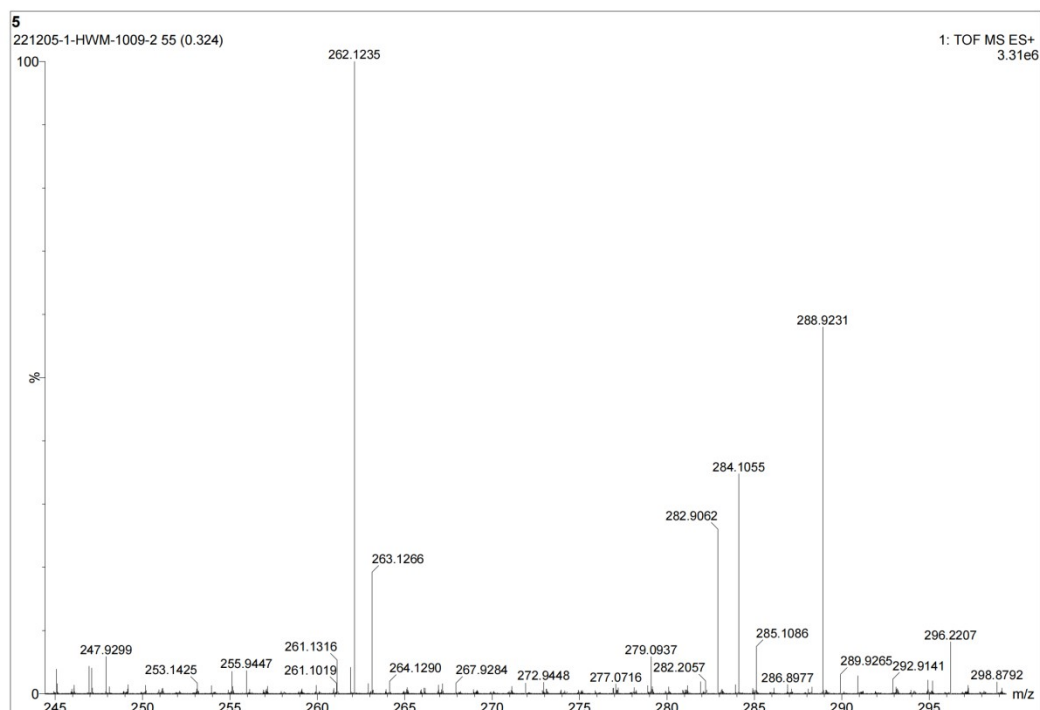

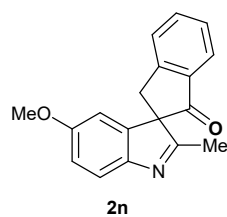

### 5'-methoxy-2'-methylspiro[indene-2,3'-indol]-1(3H)-one (**2n**)

Flash column chromatography on a silica gel (PE/EA, v/v, 4:1) gives **2n** (22.2 mg, 80% yield) as a yellow oil;  $^1\text{H}$  NMR (500 MHz,  $\text{CDCl}_3$ )  $\delta$  7.82 (d,  $J = 7.8$  Hz, 1H), 7.74 – 7.69 (m, 1H), 7.63 (d,  $J = 7.7$  Hz, 1H), 7.50 – 7.45 (m, 2H), 6.84 (dd,  $J_1 = 8.5$  Hz,  $J_2 = 2.6$  Hz, 1H), 6.54 (d,  $J = 2.4$  Hz, 1H), 3.70 (s, 3H), 3.59 (d,  $J = 17.6$  Hz, 1H), 3.44 (d,  $J = 17.6$  Hz, 1H), 2.10 (s, 3H).  $^{13}\text{C}\{^1\text{H}\}$  NMR (125 MHz,  $\text{CDCl}_3$ )  $\delta$  200.4, 177.1, 158.4, 152.8, 150.0, 142.1, 136.4, 135.8, 128.3, 127.0, 125.4, 120.5, 113.3, 108.0, 72.5, 55.7, 35.5, 16.3. IR ( $\text{cm}^{-1}$ ): 2986(C-H), 1670(C=O), 1613(C=N), 1613(Ar C=C), 1441(C-H), 1174(C-N), 1067(C-O-C), 786(C-C). HRMS(ESI)  $m/z$ :  $[\text{M}+\text{H}]^+$  Calcd. for  $\text{C}_{18}\text{H}_{16}\text{NO}_2^+$  278.1176, Found 278.1183.

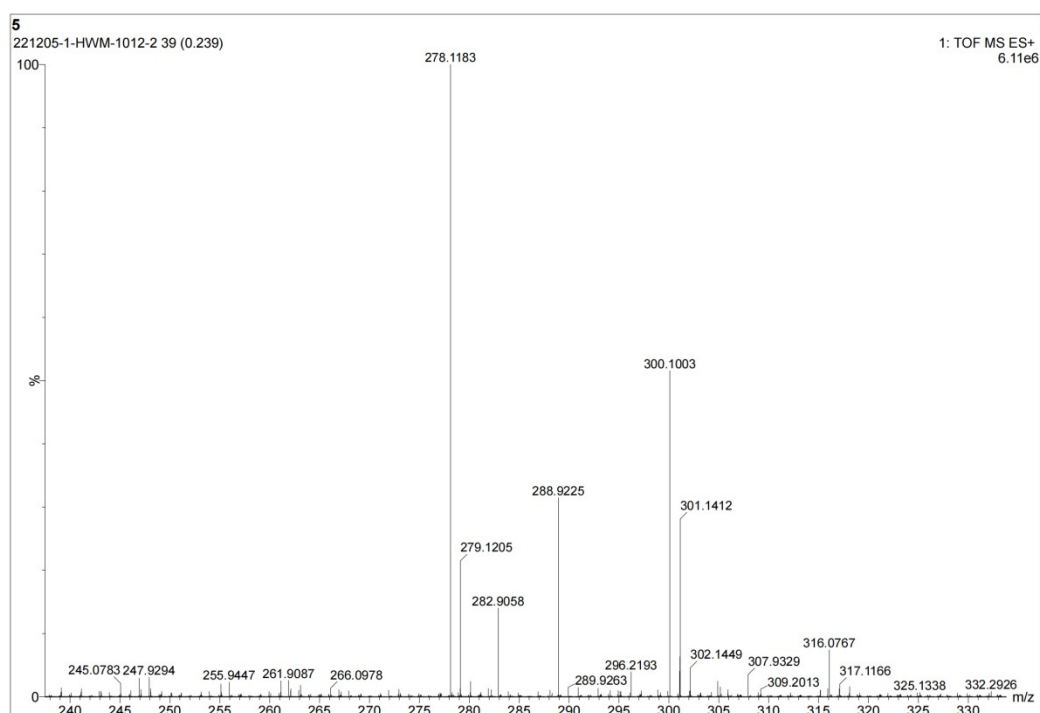

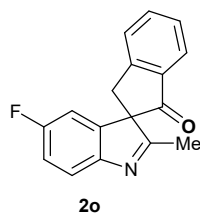

### 5'-fluoro-2'-methylspiro[indene-2,3'-indol]-1(3H)-one (**2o**)

Flash column chromatography on a silica gel (PE/EA, v/v, 4:1) gives **2o** (20.1 mg, 76% yield) as a yellow solid: m.p. 151-152 °C; <sup>1</sup>H NMR (500 MHz, CDCl<sub>3</sub>) δ 7.87 (d, *J* = 7.8 Hz, 1H), 7.77 (t, *J* = 7.5 Hz, 1H), 7.67 (d, *J* = 7.7 Hz, 1H), 7.57 – 7.51 (m, 2H), 7.05 (td, *J*<sub>1</sub> = 8.9 Hz, *J*<sub>2</sub> = 2.5 Hz, 1H), 6.74 (dd, *J*<sub>1</sub> = 7.8 Hz, *J*<sub>2</sub> = 2.5 Hz, 1H), 3.65 (d, *J* = 17.6 Hz, 1H), 3.50 (d, *J* = 17.6 Hz, 1H), 2.16 (s, 3H). <sup>13</sup>C{<sup>1</sup>H} NMR (125 MHz, CDCl<sub>3</sub>) δ 199.6, 179.2, 161.3 (d, *J*<sub>C-F</sub> = 243.5 Hz), 152.5, 152.4, 142.2 (d, *J*<sub>C-F</sub> = 9.0 Hz), 136.2, 136.0, 128.5, 127.0, 125.6, 121.0 (d, *J*<sub>C-F</sub> = 8.8 Hz), 115.2 (d, *J*<sub>C-F</sub> = 23.4 Hz), 109.1 (d, *J*<sub>C-F</sub> = 24.8 Hz), 72.8 (d, *J*<sub>C-F</sub> = 2.4 Hz), 35.1, 16.4. <sup>19</sup>F NMR (471 MHz, CDCl<sub>3</sub>) δ -116.2. IR (cm<sup>-1</sup>): 2987(C-H), 1685(C=O), 1614(C=N), 1614(Ar C=C), 1440(C-H), 1174(C-F), 800(C-C). HRMS(ESI) *m/z*: [M+H]<sup>+</sup> Calcd. for C<sub>17</sub>H<sub>13</sub>FNO<sup>+</sup> 266.0976, Found 266.0982.

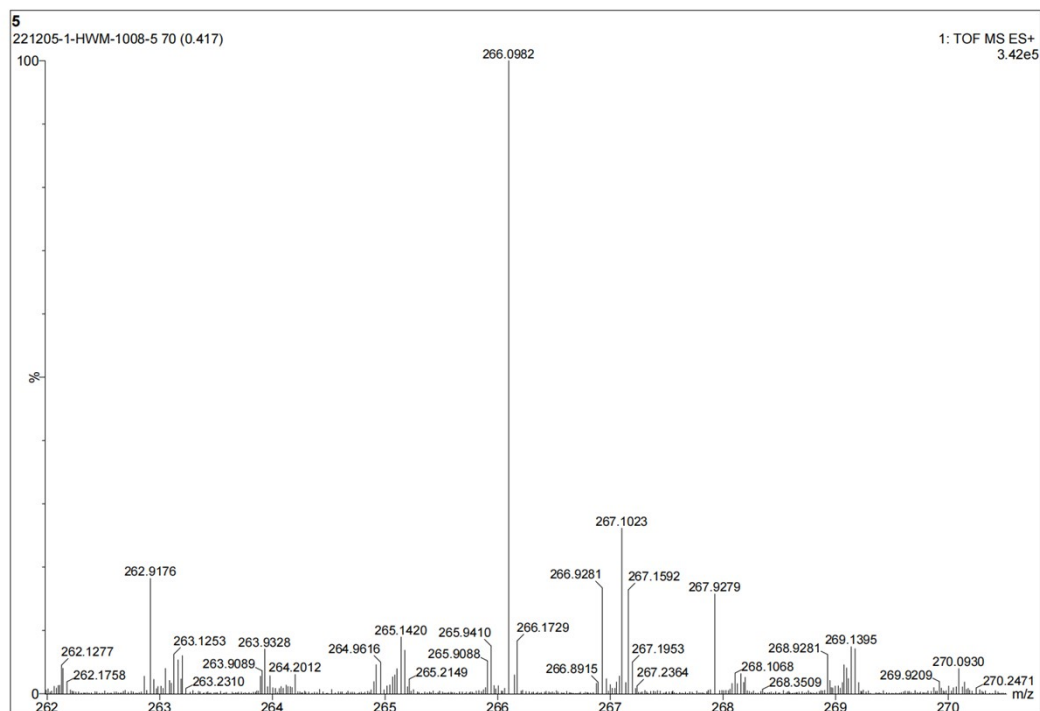

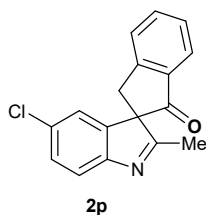

### 5'-chloro-2'-methylspiro[indene-2,3'-indol]-1(3H)-one (**2p**)

Flash column chromatography on a silica gel (PE/EA, v/v, 4:1) gives **2p** (21.9 mg, 78% yield) as a yellow solid: m.p. 97-98 °C;  $^1\text{H}$  NMR (500 MHz,  $\text{CDCl}_3$ )  $\delta$  7.85 (d,  $J = 7.7$  Hz, 1H), 7.75 (t,  $J = 7.5$  Hz, 1H), 7.65 (d,  $J = 7.6$  Hz, 1H), 7.51 (dd,  $J_1 = 8.1$  Hz,  $J_2 = 5.5$  Hz, 2H), 7.31 (dd,  $J_1 = 8.3$  Hz,  $J_2 = 2.1$  Hz, 1H), 6.97 (d,  $J = 2.1$  Hz, 1H), 3.62 (d,  $J = 17.7$  Hz, 1H), 3.48 (d,  $J = 17.6$  Hz, 1H), 2.15 (s, 3H).  $^{13}\text{C}\{^1\text{H}\}$  NMR (125 MHz,  $\text{CDCl}_3$ )  $\delta$  199.4, 179.9, 155.0, 152.5, 142.3, 136.13, 136.08, 131.5, 128.8, 128.5, 127.0, 125.6, 121.7, 121.1, 72.6, 35.1, 16.4. IR ( $\text{cm}^{-1}$ ): 2976(C-H), 1714(C=O), 1608(Ar C=C), 1558(C=N), 1454(C-H), 1174(C-N), 1050(C-Cl), 786(C-C). HRMS(ESI)  $m/z$ :  $[\text{M}+\text{H}]^+$  Calcd. for  $\text{C}_{18}\text{H}_{16}\text{ClNO}^+$  282.0680, Found 282.0691.

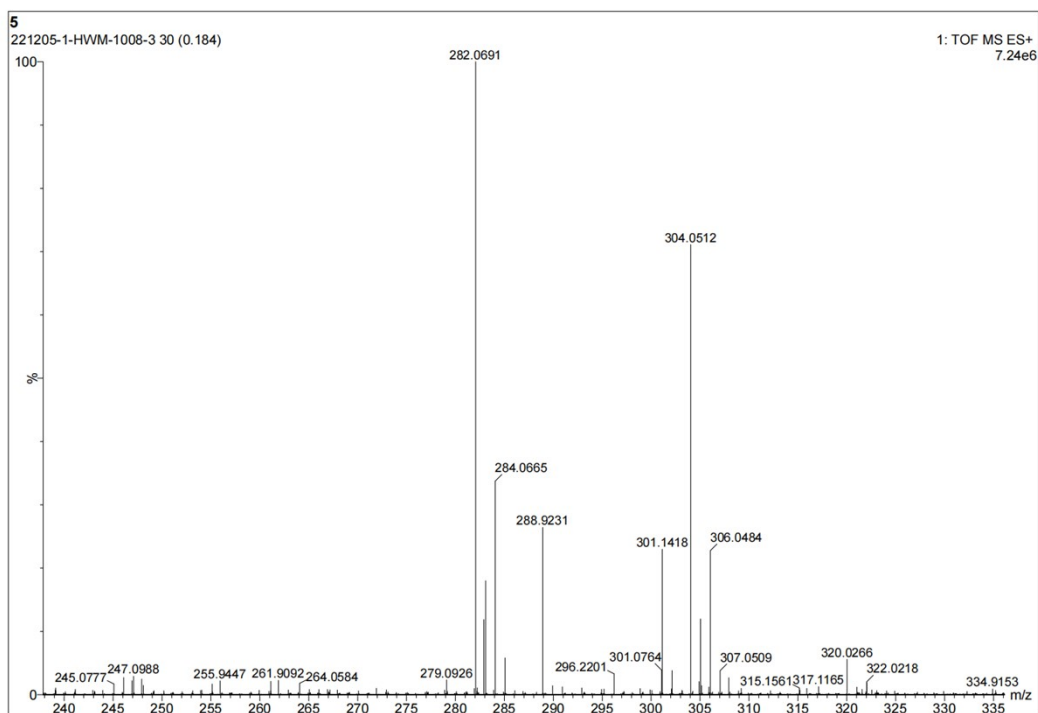

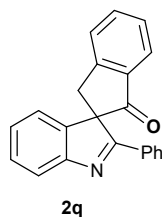

**2'-phenylspiro[indene-2,3'-indol]-1(3H)-one (2q)<sup>1</sup>**

Flash column chromatography on a silica gel (PE/EA, v/v, 4:1) gives **2q** (18.5 mg, 60% yield) as a yellowish solid: m.p. 181-182 °C; <sup>1</sup>H NMR (500 MHz, CDCl<sub>3</sub>) δ 7.96 (d, *J* = 7.7 Hz, 1H), 7.81-7.76 (m, 2H), 7.69-7.66 (m, 3H), 7.57 (t, *J* = 7.8 Hz, 1H), 7.43-7.33 (m, 4H), 7.13 (dt, *J*<sub>1</sub> = 7.5 Hz, *J*<sub>2</sub> = 1.1 Hz, 1H), 6.91 (d, *J* = 7.4 Hz, 1H), 3.84 (d, *J* = 17.7 Hz, 1H), 3.51 (d, *J* = 17.7 Hz, 1H). <sup>13</sup>C{<sup>1</sup>H} NMR (125 MHz, CDCl<sub>3</sub>) δ 200.2, 177.2, 155.8, 152.5, 142.0, 136.4, 135.8 (2C), 131.7, 131.1, 128.9 (2C), 128.8, 128.4, 127.9, 127.3, 126.3, 125.9, 121.3, 120.1, 70.5, 37.6. IR (cm<sup>-1</sup>): 2987(C-H), 1675(C=O), 1613(Ar C=C), 1613(C=N), 1441(C-H), 1174(C-N), 900(C-C), 799(C-C). HRMS(ESI) m/z: [M+H]<sup>+</sup> Calcd. for C<sub>22</sub>H<sub>16</sub>NO<sup>+</sup> 310.1226, Found 310.1232.

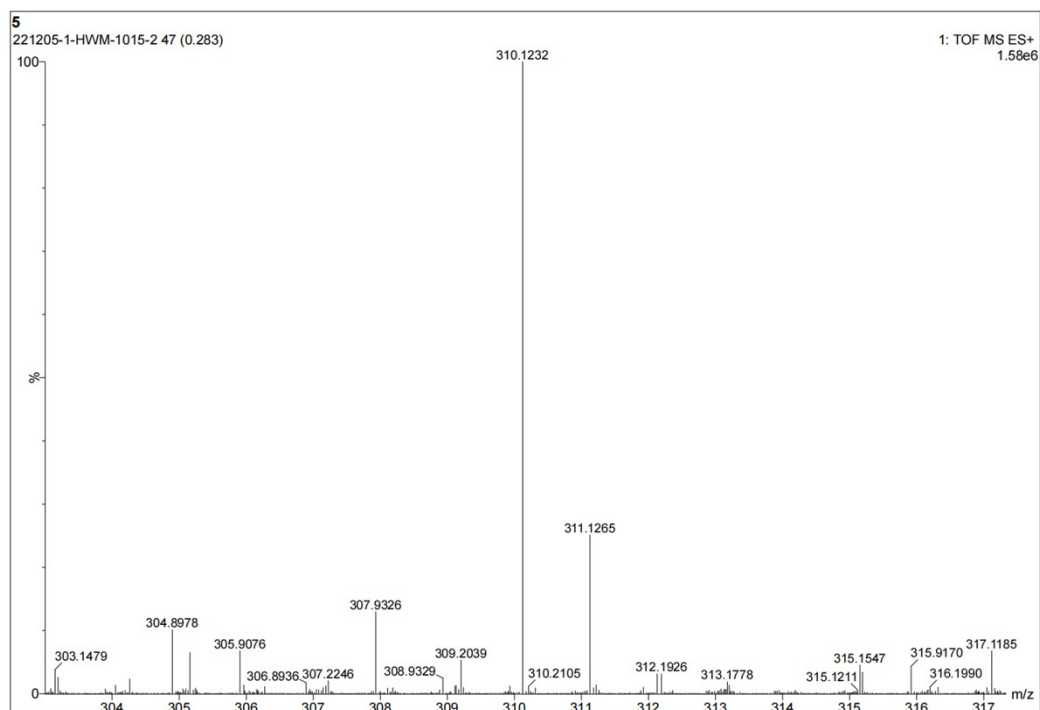

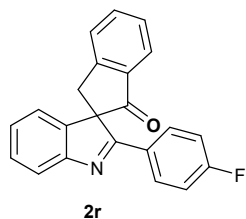

**2'-(4-fluorophenyl)spiro[indene-2,3'-indol]-1(3H)-one (2r)<sup>1</sup>**

Flash column chromatography on a silica gel (PE/EA, v/v, 4:1) gives **2r** (18.6 mg, 57% yield) as a yellow solid: m.p. 138-139 °C; <sup>1</sup>H NMR (500 MHz, CDCl<sub>3</sub>) δ 7.95 (d, *J* = 7.7 Hz, 1H), 7.81-7.56 (m, 5H), 7.57 (t, *J* = 7.3 Hz, 1H), 7.39 (dt, *J*<sub>1</sub> = 7.8 Hz, *J*<sub>2</sub> = 1.2 Hz, 1H), 7.13 (dt, *J*<sub>1</sub> = 7.5 Hz, *J*<sub>2</sub> = 1.1 Hz, 1H), 7.05-7.02 (m, 2H), 6.91 (d, *J* = 7.3 Hz, 1H), 3.79 (d, *J* = 17.7 Hz, 1H), 3.52 (d, *J* = 17.7 Hz, 1H). <sup>13</sup>C{<sup>1</sup>H} NMR (125 MHz, CDCl<sub>3</sub>) δ 200.0, 175.9, 164.5 (d, *J*<sub>C-F</sub> = 251.3 Hz), 155.7, 152.4, 141.9, 136.2, 136.0, 130.0 (d, *J*<sub>C-F</sub> = 8.8 Hz), 128.9, 128.5, 128.1 (d, *J*<sub>C-F</sub> = 2.5 Hz), 127.3, 126.3, 125.9, 121.2, 120.1, 116.1 (d, *J*<sub>C-F</sub> = 21.3 Hz), 70.4, 37.6. <sup>19</sup>F NMR (471 MHz, CDCl<sub>3</sub>) δ -108.2. IR (cm<sup>-1</sup>): 2988(C-H), 1714(C=O), 1668(C=N), 1613(Ar C=C), 1441(C-H), 1174(C-N), 910(C-C), 767(C-C). HRMS(ESI) *m/z*: [M+Na]<sup>+</sup> Calcd. for C<sub>22</sub>H<sub>14</sub>FNONa<sup>+</sup> 350.0952, Found 350.0961.

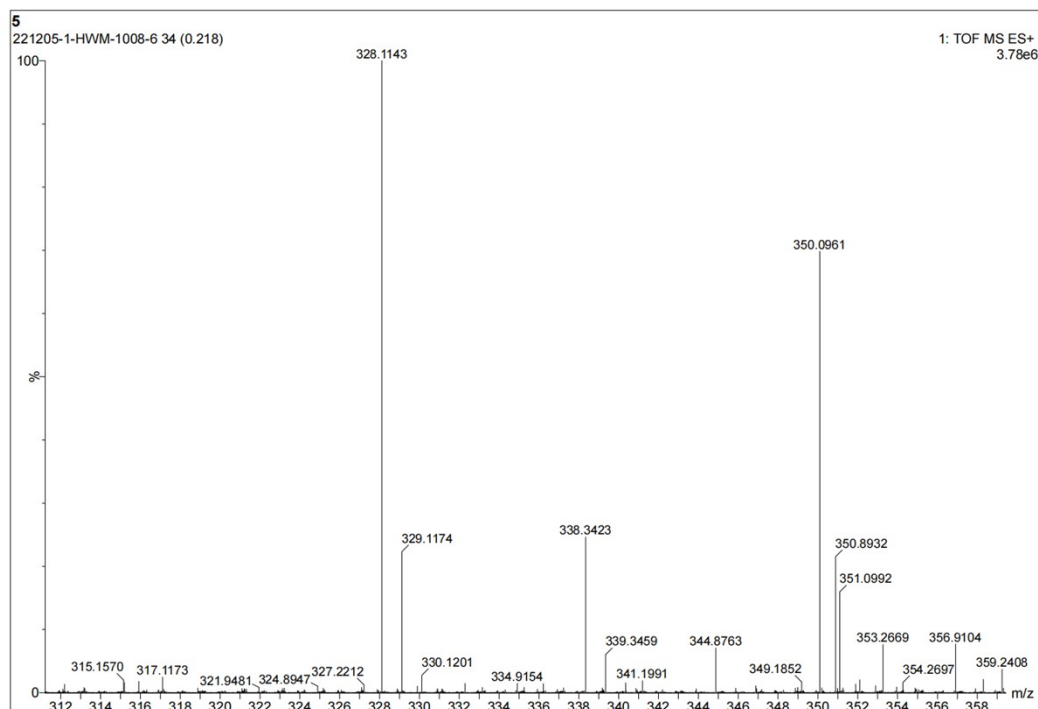

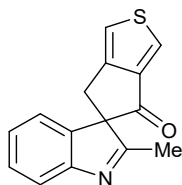

**2t**

**2'-methyl-4*H*,6*H*-spiro[cyclopenta[*c*]thiophene-5,3'-indol]-4-one (2t)**

Flash column chromatography on a silica gel (PE/EA, v/v, 20:1) gives **2t** (14.9 mg, 59% yield) as a yellow oil;  $^1\text{H}$  NMR (500 MHz,  $\text{CDCl}_3$ )  $\delta$  8.07 (d,  $J = 4.8$  Hz, 1H), 7.59 (d,  $J = 7.7$  Hz, 1H), 7.36 (t,  $J = 7.5$  Hz, 1H), 7.23 (d,  $J = 4.8$  Hz, 1H), 7.16 (dt,  $J = 14.3, 7.0$  Hz, 2H), 3.46 (d,  $J = 17.7$  Hz, 1H), 3.36 (d,  $J = 17.7$  Hz, 1H), 2.22 (s, 3H).  $^{13}\text{C}$   $\{^1\text{H}\}$  NMR (125 MHz,  $\text{CDCl}_3$ )  $\delta$  190.5, 178.9, 166.9, 156.0, 142.6, 141.0, 139.8, 128.9, 126.0, 124.1, 121.3, 120.3, 32.9, 16.2. IR ( $\text{cm}^{-1}$ ): 2986(C-H), 1663(C=O), 1614(C=N), 1614(Ar C=C), 1441(C-H), 1174(C-N), 776(C-C). HRMS(ESI)  $m/z$ :  $[\text{M}+\text{H}]^+$  Calcd. for  $\text{C}_{15}\text{H}_{12}\text{NOS}^+$  254.0634, Found 254.0639.

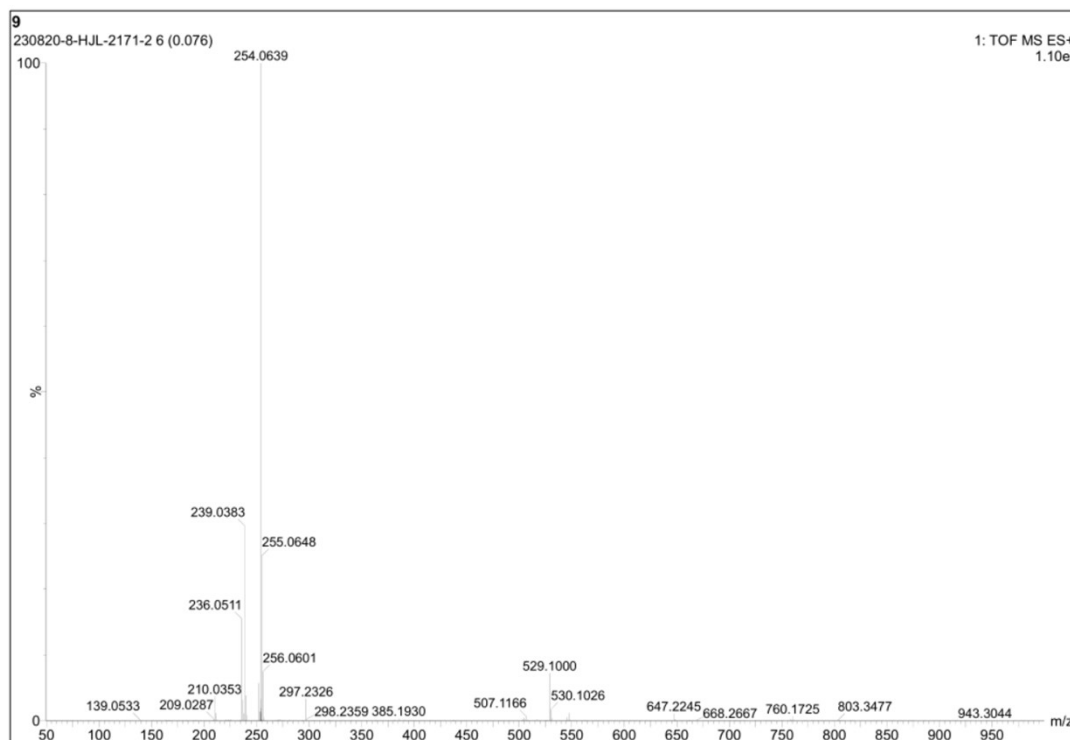

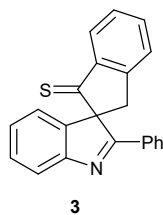

### 2'-phenylspiro[indene-2,3'-indole]-1(3*H*)-thione (**3**)

Flash column chromatography on a silica gel (PE/EA, v/v, 6:1) gives **3** (53.3 mg, 82% yield) as a yellowish oil;  $^1\text{H}$  NMR (500 MHz,  $\text{CDCl}_3$ )  $\delta$  8.80 (d,  $J = 8.2$  Hz, 1H), 8.11 (d,  $J = 7.7$  Hz, 1H), 7.81 – 7.74 (m, 2H), 7.43 – 7.37 (m, 3H), 7.34 – 7.27 (m, 2H), 7.22 – 7.17 (m, 3H), 7.17 – 7.13 (m, 1H), 3.83 (d,  $J = 15.8$  Hz, 1H), 3.46 (d,  $J = 15.7$  Hz, 1H).  $^{13}\text{C}\{^1\text{H}\}$  NMR (125 MHz,  $\text{CDCl}_3$ )  $\delta$  197.5, 162.4, 151.8, 137.7, 136.1, 135.8, 133.1, 129.7, 128.9, 128.6, 128.32 (2C), 128.29, 127.7, 125.5, 125.1 (2C), 125.0, 122.8, 117.9, 71.9, 35.8. IR ( $\text{cm}^{-1}$ ): 2958(C-H), 1666(C=N), 1604(Ar C=C), 1463(C-H), 1182(C-N), 1076(C=S), 880(C-C), 758(C-C), 694(C-C). HRMS(ESI)  $m/z$ :  $[\text{M}+\text{Na}]^+$  Calcd. for  $\text{C}_{22}\text{H}_{15}\text{NSNa}^+$  348.0817, Found 348.0815.

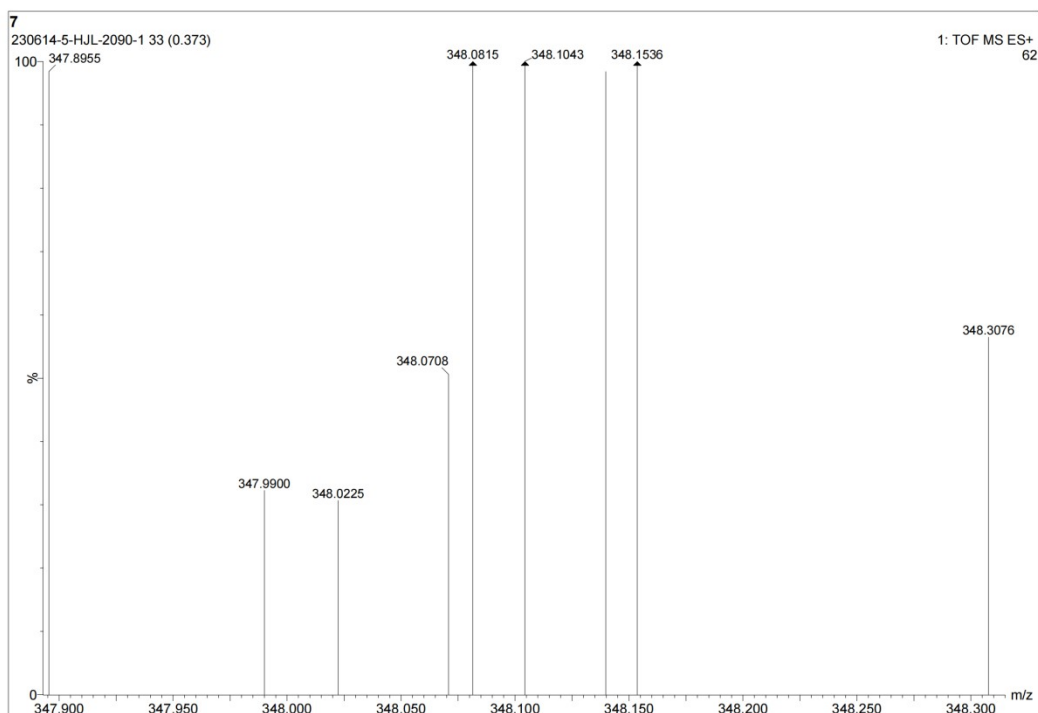



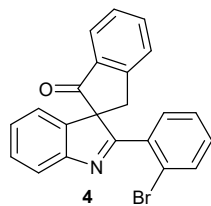

### 2'-(2-bromophenyl)spiro[indene-2,3'-indol]-1(3H)-one (4)

Flash column chromatography on a silica gel (PE/EA, v/v, 4:1) gives **4** (41.9 mg, 54% yield) as a white solid: m.p. 143-144 °C;  $^1\text{H}$  NMR (500 MHz,  $\text{CDCl}_3$ )  $\delta$  8.80 (d,  $J = 8.3$  Hz, 1H), 8.11 (d,  $J = 7.5$  Hz, 1H), 7.87 – 7.71 (m, 2H), 7.47 – 7.35 (m, 3H), 7.30 (dd,  $J_1 = 19.0$  Hz,  $J_2 = 7.5$  Hz, 2H), 7.22 – 7.19 (m, 2H), 7.17 (d,  $J = 8.6$  Hz, 1H), 3.83 (d,  $J = 15.8$  Hz, 1H), 3.46 (d,  $J = 15.8$  Hz, 1H).  $^{13}\text{C}\{^1\text{H}\}$  NMR (125 MHz,  $\text{CDCl}_3$ )  $\delta$  197.5, 162.4, 151.7, 137.7, 136.1, 135.7 (2C), 133.1, 129.7, 128.9, 128.6, 128.33, 128.30, 127.7, 125.5 (2C), 125.1, 125.0, 122.8, 117.9, 71.9, 35.8. IR ( $\text{cm}^{-1}$ ): 1719(C=O), 1665(Ar C=C), 1631(C=N), 1466(C-H), 1381(C-N), 1077(C-Br), 758(C-C), 697(C-C). HRMS(ESI)  $m/z$ :  $[\text{M}+\text{H}]^+$  Calcd. for  $\text{C}_{22}\text{H}_{15}\text{BrNO}^+$  388.0332, Found 388.0333.

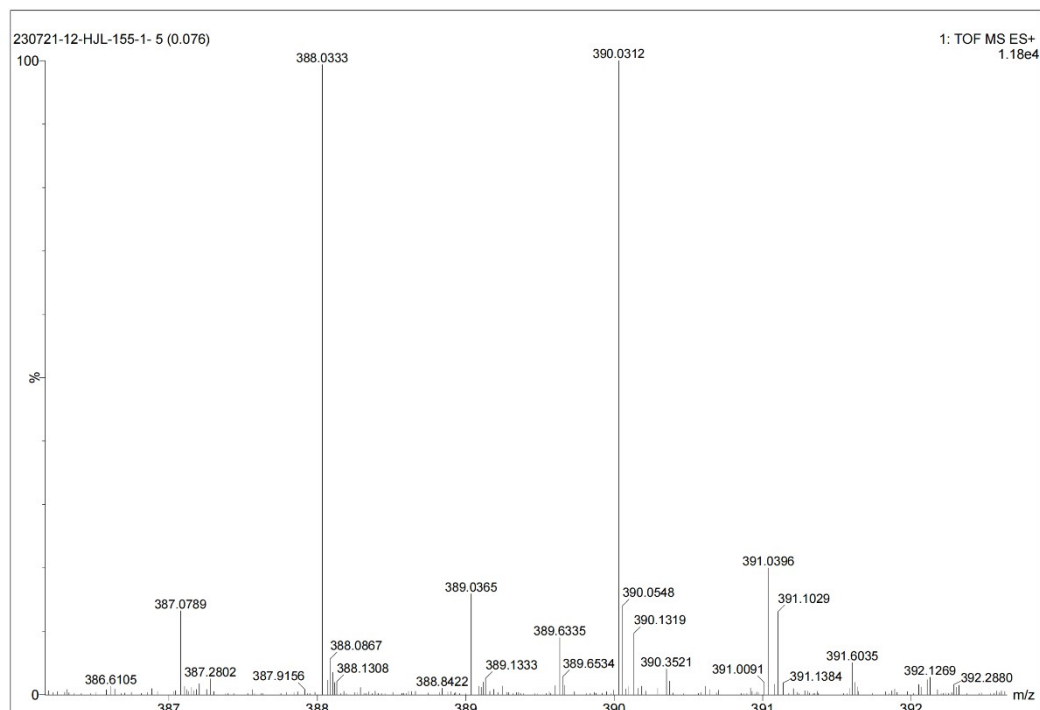

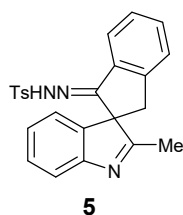

**4-methyl-N'-(2'-methylspiro[indene-2,3'-indol]-1(3H)-ylidene)  
benzenesulfonohydrazide (5)**

Flash column chromatography on a silica gel (PE/EA, v/v, 4:1) gives **5** (52.3 mg, 63% yield) as a yellowish oil;  $^1\text{H}$  NMR (500 MHz,  $\text{CDCl}_3$ )  $\delta$  7.81 (d,  $J = 8.5$  Hz, 2H), 7.74 (d,  $J = 8.4$  Hz, 1H), 7.46 – 7.42 (m, 1H), 7.39 – 7.36 (m, 2H), 7.22 (d,  $J = 8.1$  Hz, 2H), 7.13 (t,  $J = 7.5$  Hz, 1H), 6.78 (d,  $J = 7.9$  Hz, 1H), 6.68 (t,  $J = 7.5$  Hz, 1H), 6.60 (d,  $J = 7.1$  Hz, 1H), 5.73 (s, 1H), 3.25 (d,  $J = 15.9$  Hz, 1H), 2.89 (d,  $J = 16.0$  Hz, 1H), 2.37 (s, 3H), 1.74 (s, 3H).  $^{13}\text{C}\{^1\text{H}\}$  NMR (125 MHz,  $\text{CDCl}_3$ )  $\delta$  166.5, 149.8, 147.2, 143.7, 136.9, 131.5, 131.0, 129.43, 129.38, 129.1, 128.6, 128.1, 127.9, 127.8, 126.3, 123.7, 122.1, 120.6, 110.1, 98.4, 70.6, 37.8, 21.5, 18.9. IR ( $\text{cm}^{-1}$ ): 2957(C-H), 1614(Ar C=C), 1605(C=N), 1468(C-H), 1166(C-N), 815(C-C), 739(C-C). HRMS(ESI)  $m/z$ :  $[\text{M}+\text{Na}]^+$  Calcd. for  $\text{C}_{24}\text{H}_{21}\text{N}_3\text{O}_2\text{SNa}^+$  438.1247, Found 438.1254.

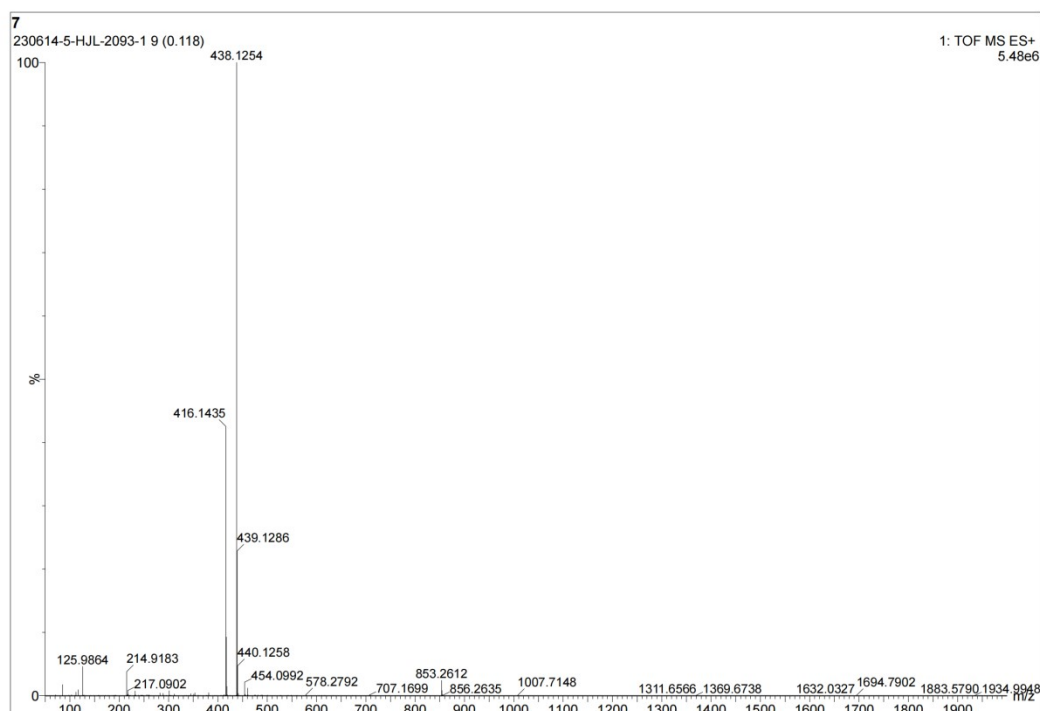

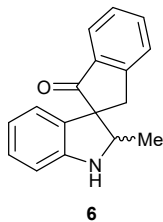

### 2'-methylspiro[indene-2,3'-indolin]-1(3*H*)-one (**6**)

Flash column chromatography on a silica gel (PE/EA, v/v, 4:1) gives **6** (39.9 mg, 80% yield) as a yellow oil;  $^1\text{H}$  NMR (500 MHz,  $\text{CDCl}_3$ )  $\delta$  7.78 (d,  $J = 7.7$  Hz, 1H), 7.65 (t,  $J = 7.4$  Hz, 1H), 7.53 (d,  $J = 7.7$  Hz, 1H), 7.42 (t,  $J = 7.4$  Hz, 1H), 7.09 (t,  $J = 7.6$  Hz, 1H), 6.82 – 6.73 (m, 2H), 6.70 (t,  $J = 7.4$  Hz, 1H), 4.12 (q,  $J = 6.6$  Hz, 1H), 3.60 (d,  $J = 17.5$  Hz, 1H), 3.24 (d,  $J = 17.5$  Hz, 1H), 1.27 (d,  $J = 6.6$  Hz, 3H).  $^{13}\text{C}$   $\{^1\text{H}\}$  NMR (125 MHz,  $\text{CDCl}_3$ )  $\delta$  204.0, 152.7, 151.4, 136.1, 135.0, 133.0, 128.6, 128.0, 126.1, 124.7, 122.6, 119.6, 111.0, 65.4, 61.8, 40.9, 15.6. IR ( $\text{cm}^{-1}$ ): 3418(N-H), 1714(C=O), 1602(Ar C=C), 1506(C=N), 1464(C-H), 1404(C-H), 879(C-C), 746(C-C). HRMS(ESI)  $m/z$ :  $[\text{M}+\text{H}]^+$  Calcd. for  $\text{C}_{17}\text{H}_{16}\text{NO}^+$  250.1226, Found 250.1231.

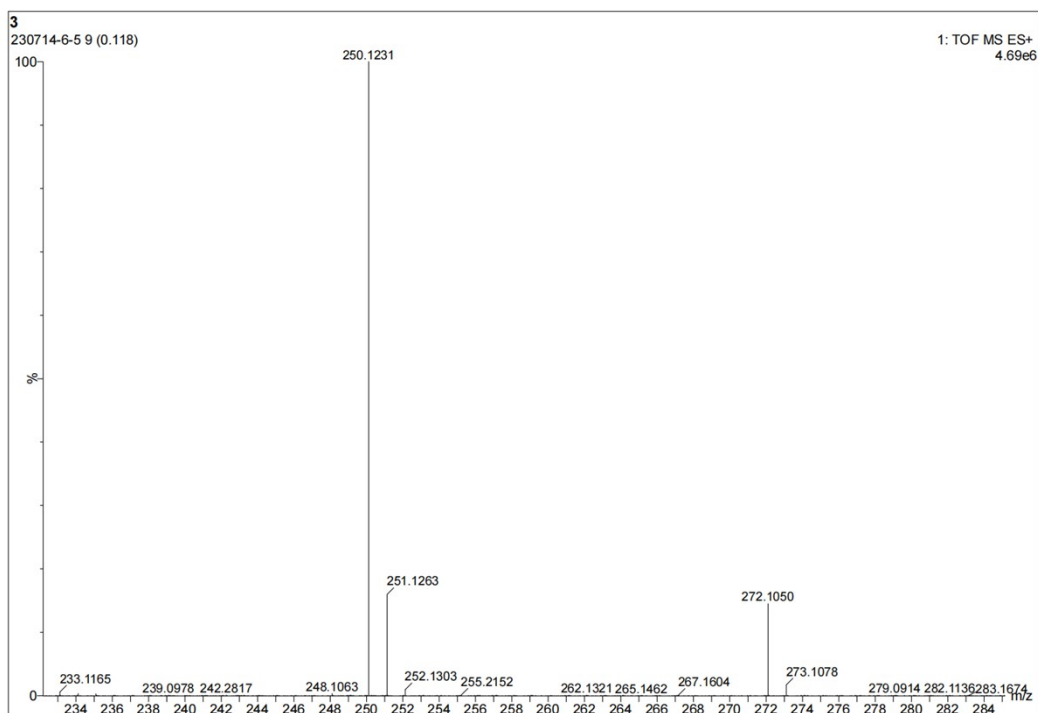

#### IV. References

1. S. Bera, C. G. Daniliuc and A. Studer, Oxidative N-Heterocyclic Carbene Catalyzed Dearomatization of Indoles to Spirocyclic Indolenines with a Quaternary Carbon Stereocenter, *Angew. Chem., Int. Ed.*, 2017, **56**, 7402–7406.
2. Q.-F. Wu, C. Zheng and S.-L. You, Enantioselective Synthesis of Spiro Cyclopentane-1,3'-Indoles and 2,3,4,9-Tetrahydro-1H-Carbazoles by Iridium-Catalyzed Allylic Dearomatization and Stereospecific Migration, *Angew. Chem., Int. Ed.*, 2012, **51**, 1680–1683.
3. H. C. Erythropel, J. B. Zimmerman, T. M. de Winter, L. Petitjean, F. Melnikov, C. H. Lam, A. W. Lounsbury, K. E. Mellor, N. Z. Janković, Q. Tu, L. N. Pincus, M. M. Falinski, W. Shi, P. Coish, D. L. Plata and P. T. Anastas, The Green ChemisTREE: 20 Years after Taking Root with the 12 Principles, *Green Chem.*, 2018, **20**, 1929–1961.
4. Q. Li, Y. Zhang, Y. Zeng, Y. Fan, A. Lin and H. Yao, Palladium-Catalyzed Asymmetric Dearomative Carbonylation of Indoles, *Org. Lett.*, 2022, **24**, 3033–3037.
5. D. M. Allwood, D. C. Blakemore and S. V. Ley, Preparation of Unsymmetrical Ketones from Tosylhydrazones and Aromatic Aldehydes via Formyl C–H Bond Insertion, *Org. Lett.*, 2014, **16**, 3064–3067.

## V. Copies NMR Spectra

### 3-(2-bromobenzyl)-2-methyl-1H-indole (1a)

$^1\text{H}$  NMR (500 MHz,  $\text{CDCl}_3$ )

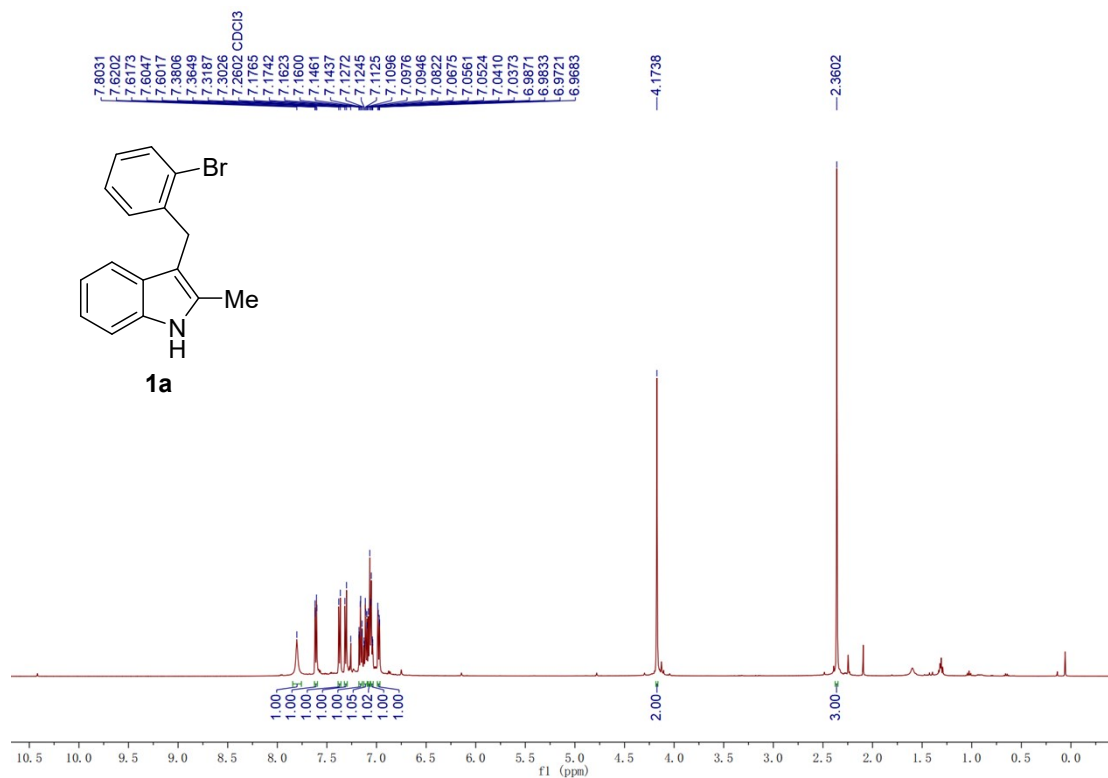

$^{13}\text{C}\{^1\text{H}\}$  NMR (125 MHz,  $\text{CDCl}_3$ )

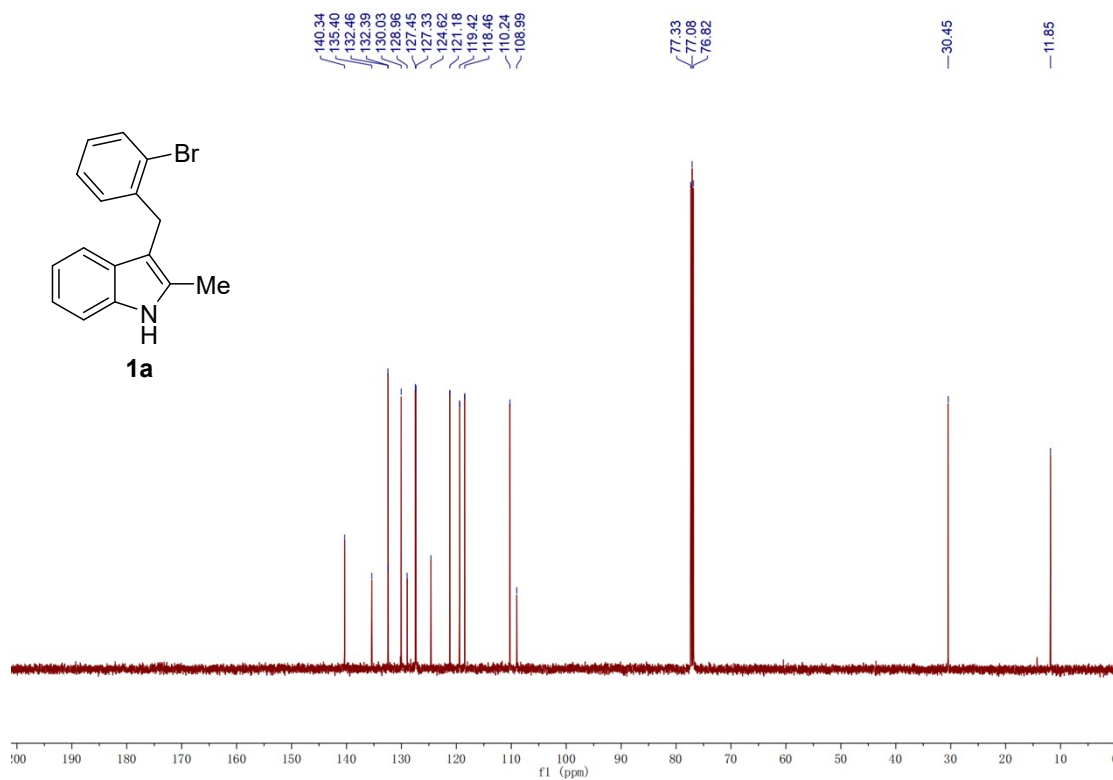

### 3-(2-bromo-5-methylbenzyl)-2-methyl-1H-indole (1b)

$^1\text{H}$  NMR (500 MHz,  $\text{CDCl}_3$ )

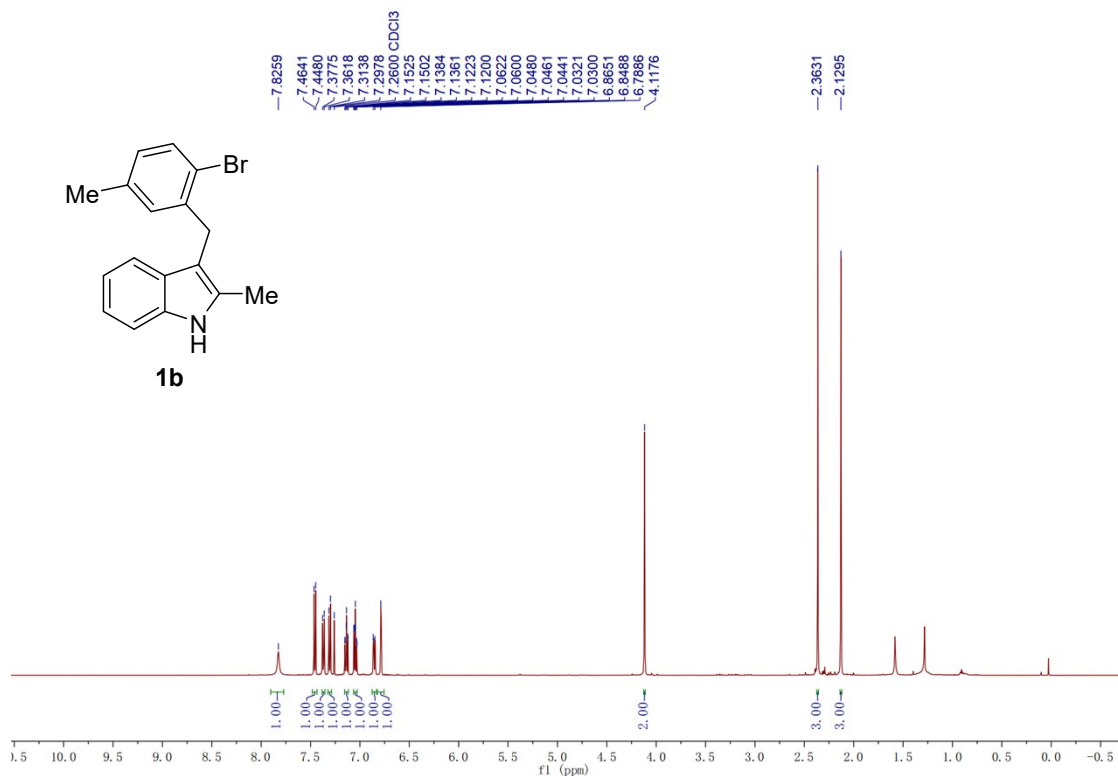

$^{13}\text{C}\{^1\text{H}\}$  NMR (125 MHz,  $\text{CDCl}_3$ )

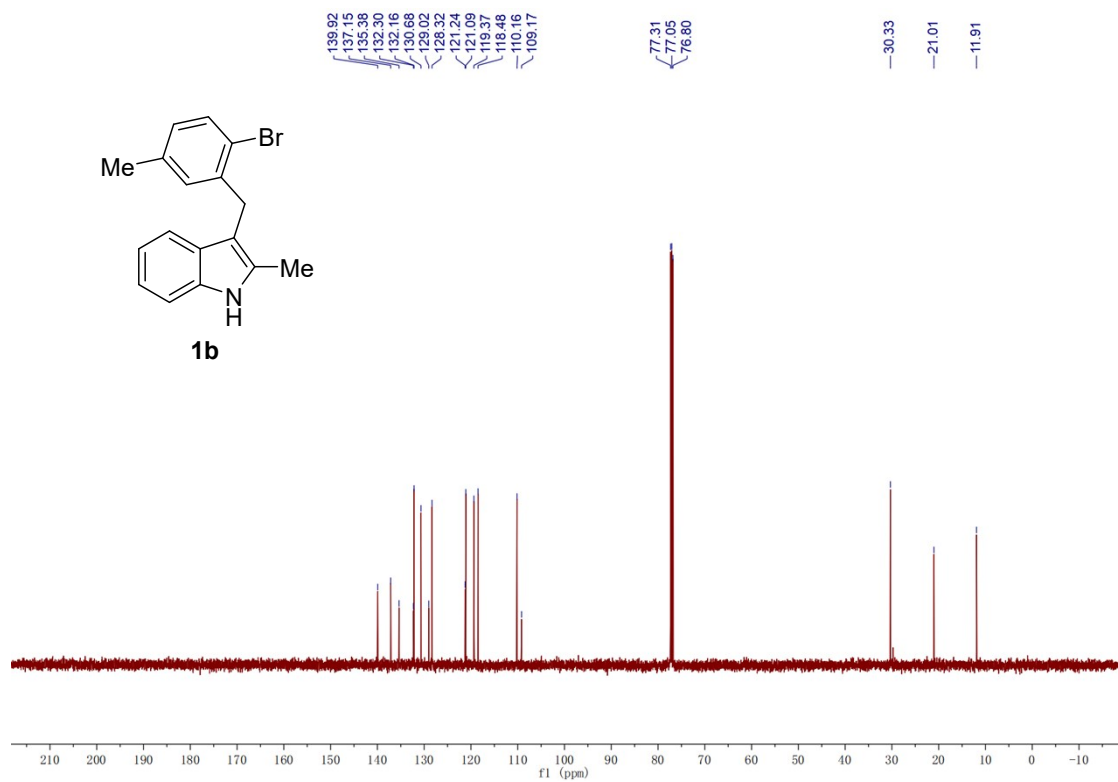

### 3-(2-bromo-4-methylbenzyl)-2-methyl-1H-indole (1c)

$^1\text{H}$  NMR (500 MHz,  $\text{CDCl}_3$ )

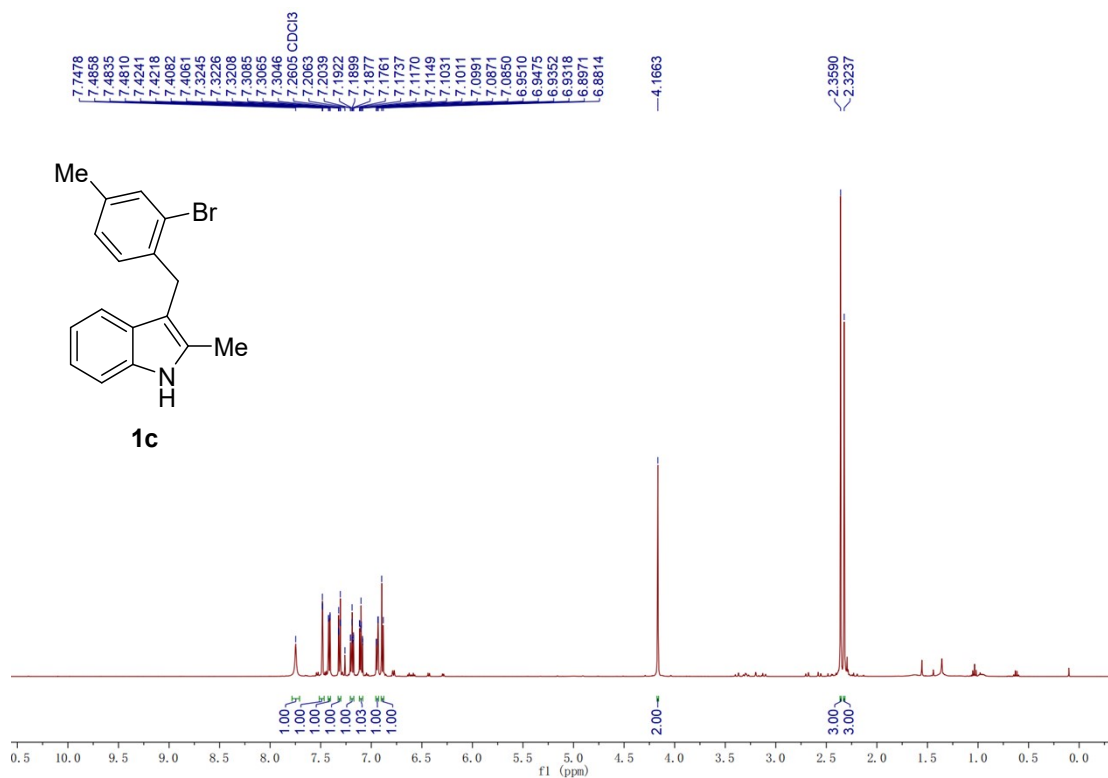

$^{13}\text{C}\{^1\text{H}\}$  NMR (125 MHz,  $\text{CDCl}_3$ )

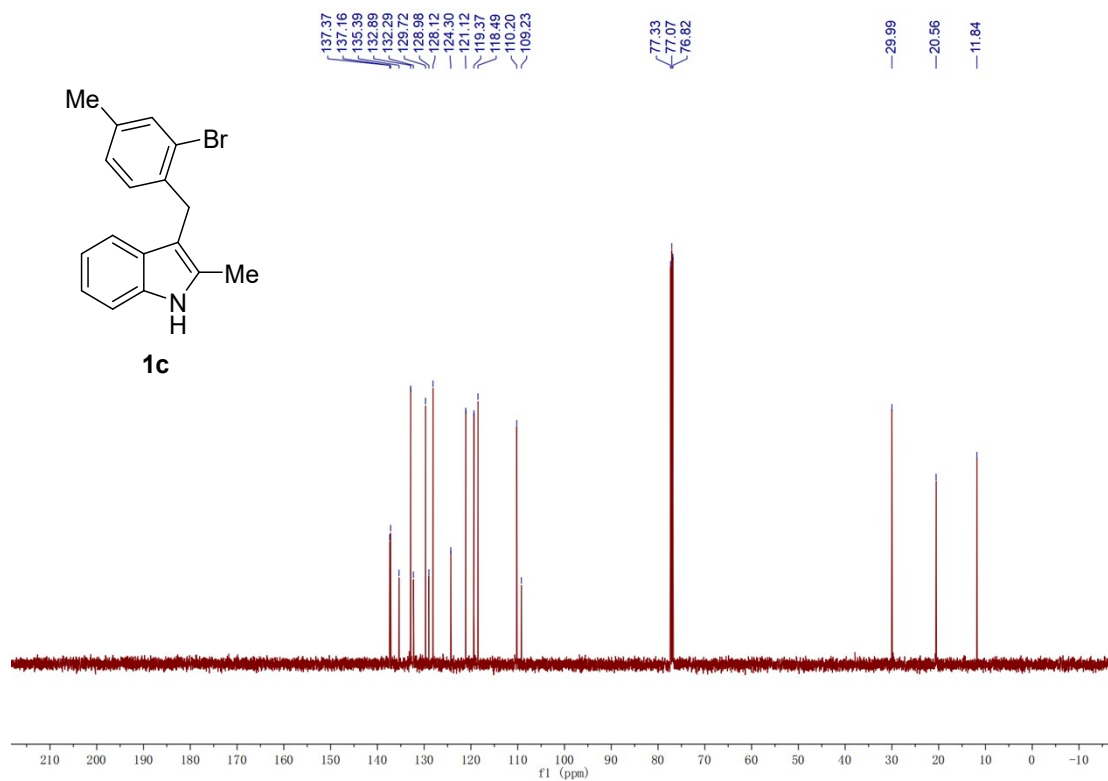

### 3-(2-bromo-4-methoxybenzyl)-2-methyl-1H-indole (1d)

$^1\text{H}$  NMR (500 MHz,  $\text{CDCl}_3$ )

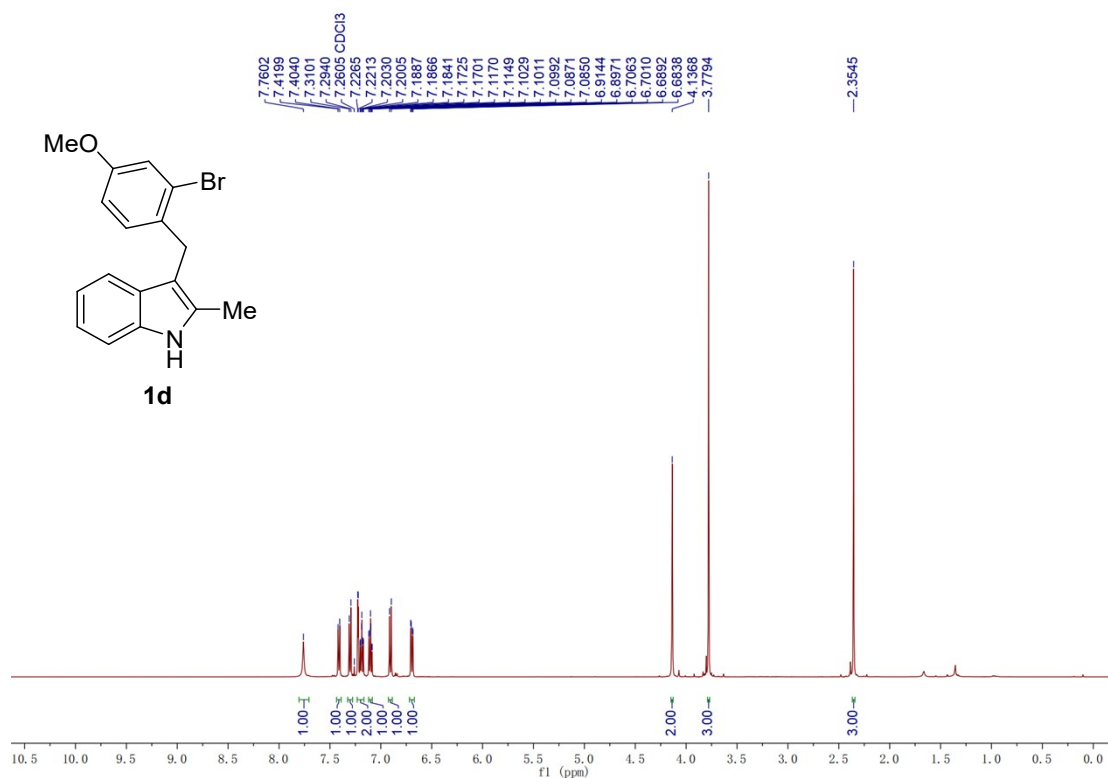

$^{13}\text{C}\{^1\text{H}\}$  NMR (125 MHz,  $\text{CDCl}_3$ )

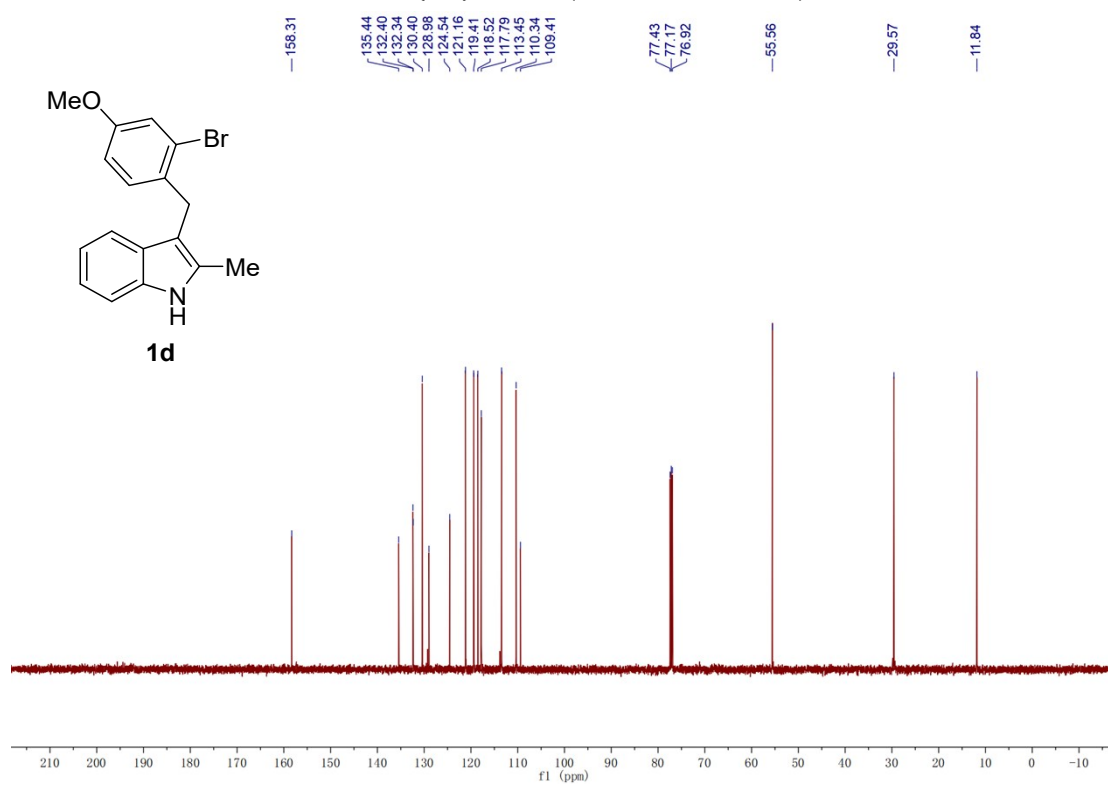



### 3-(2-bromo-5-methoxybenzyl)-2-methyl-1H-indole (1e)

$^1\text{H}$  NMR (500 MHz,  $\text{CDCl}_3$ )

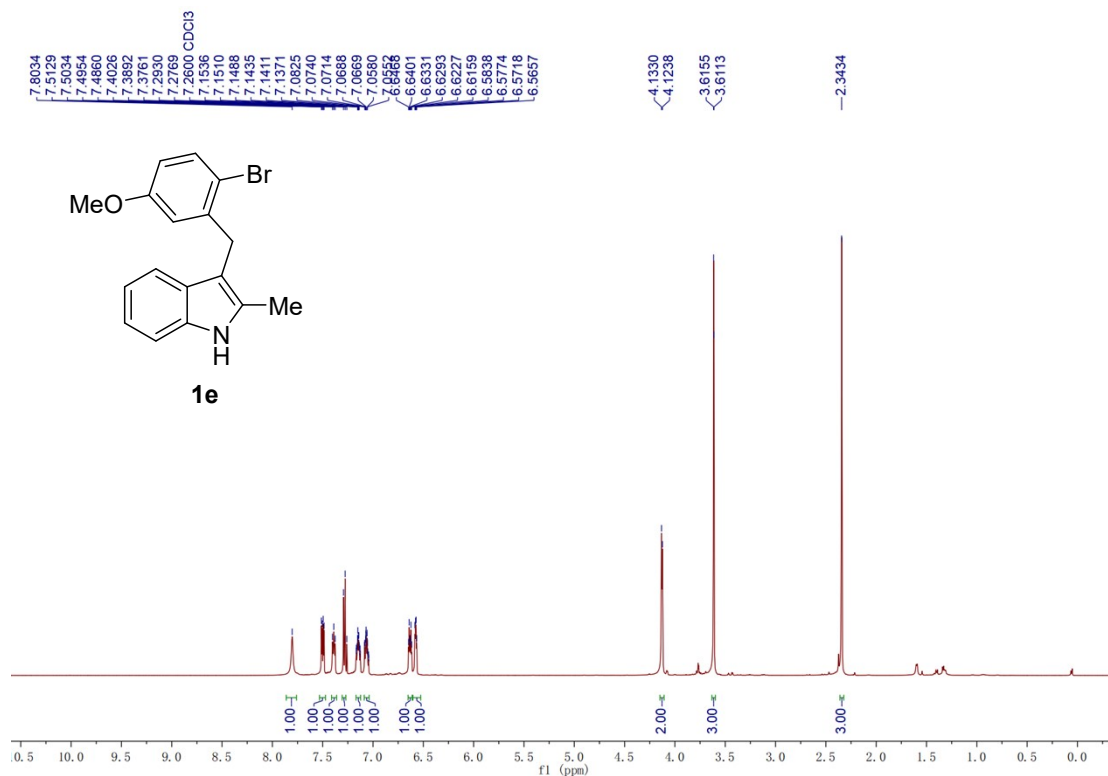

$^{13}\text{C}\{^1\text{H}\}$  NMR (125 MHz,  $\text{CDCl}_3$ )

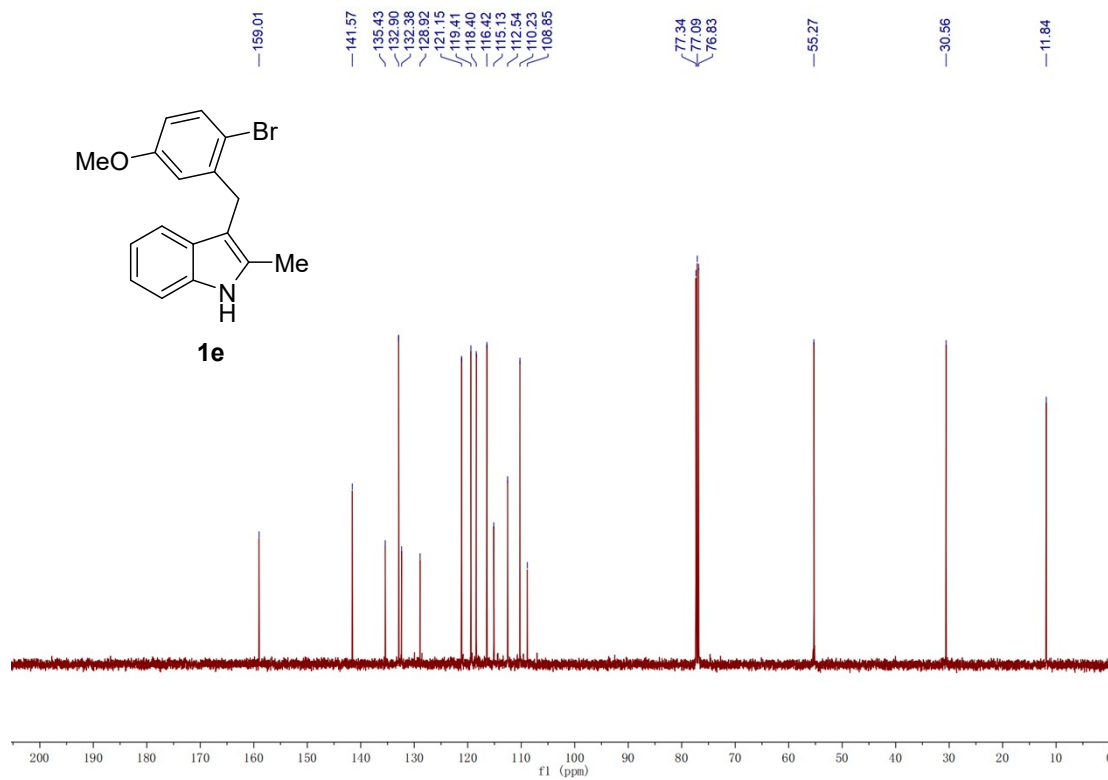

### 3-(2-bromo-5-fluorobenzyl)-2-methyl-1H-indole (1f)

$^1\text{H NMR}$  (500 MHz,  $\text{CDCl}_3$ )

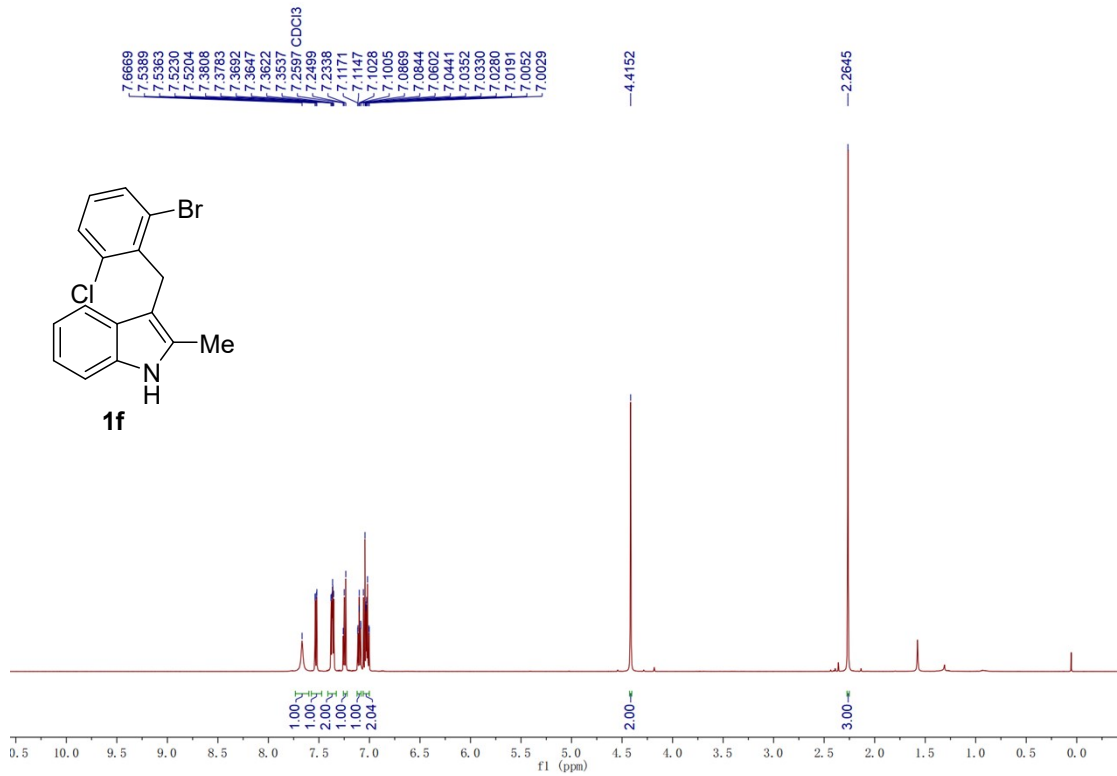

$^{13}\text{C}\{^1\text{H}\}$  NMR (125 MHz,  $\text{CDCl}_3$ )

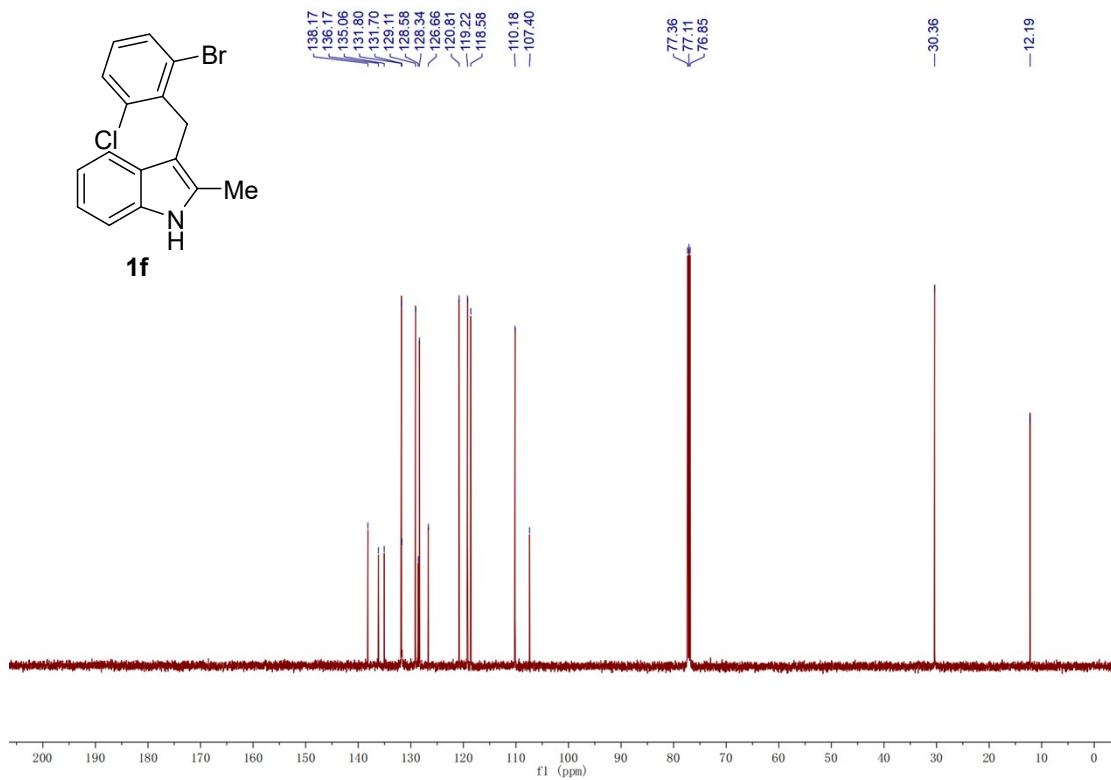

### 3-(2-bromo-5-chlorobenzyl)-2-methyl-1H-indole (1g)

$^1\text{H}$  NMR (500 MHz,  $\text{CDCl}_3$ )

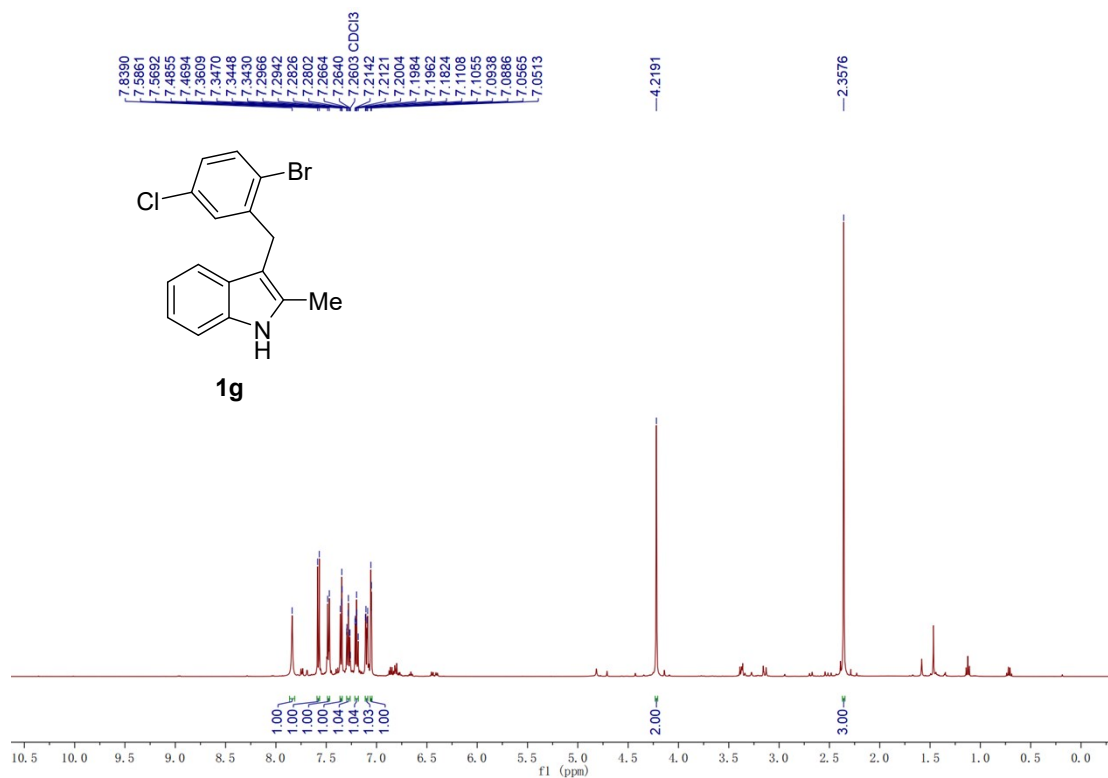

$^{13}\text{C}\{^1\text{H}\}$  NMR (125 MHz,  $\text{CDCl}_3$ )

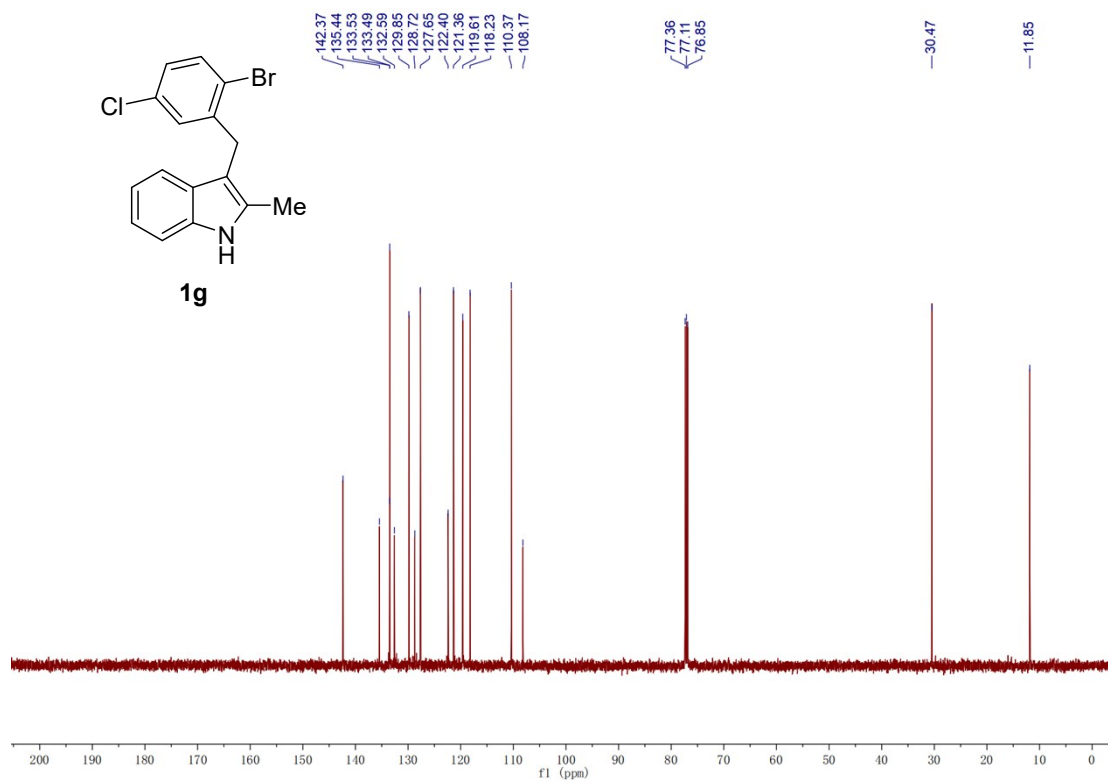

### 3-(2-bromo-5-fluorobenzyl)-2-methyl-1H-indole (1h)

$^1\text{H}$  NMR (500 MHz,  $\text{CDCl}_3$ )

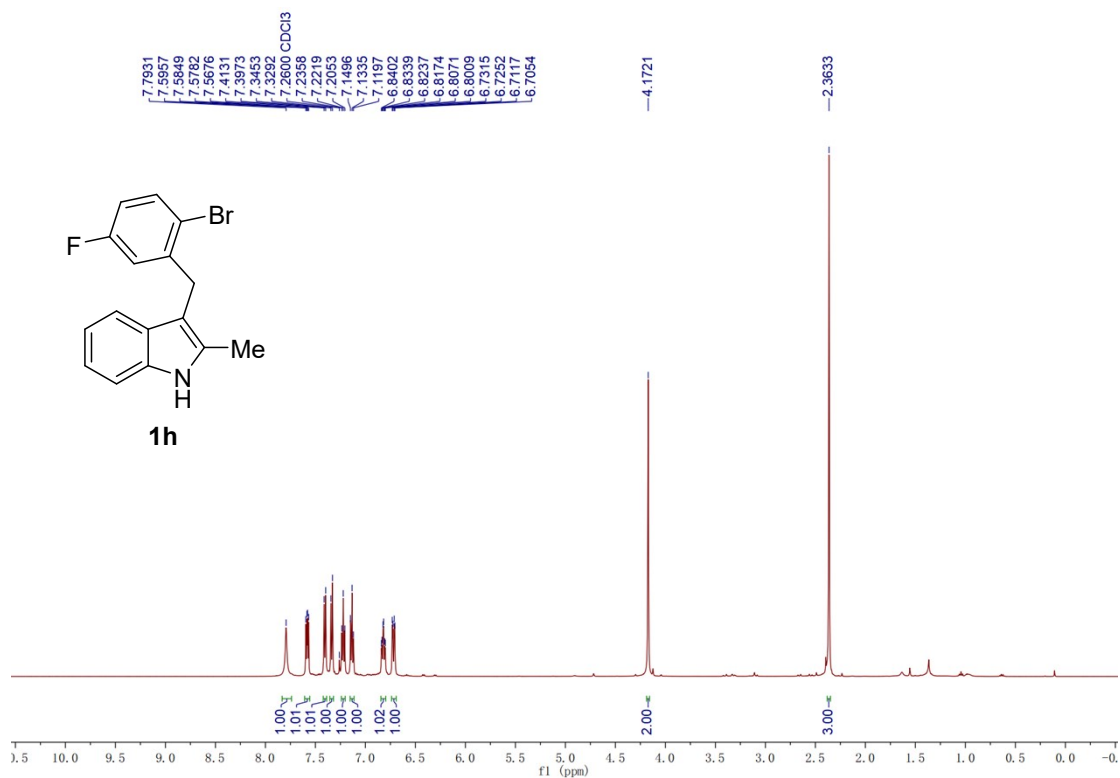

$^{13}\text{C}\{^1\text{H}\}$  NMR (125 MHz,  $\text{CDCl}_3$ )

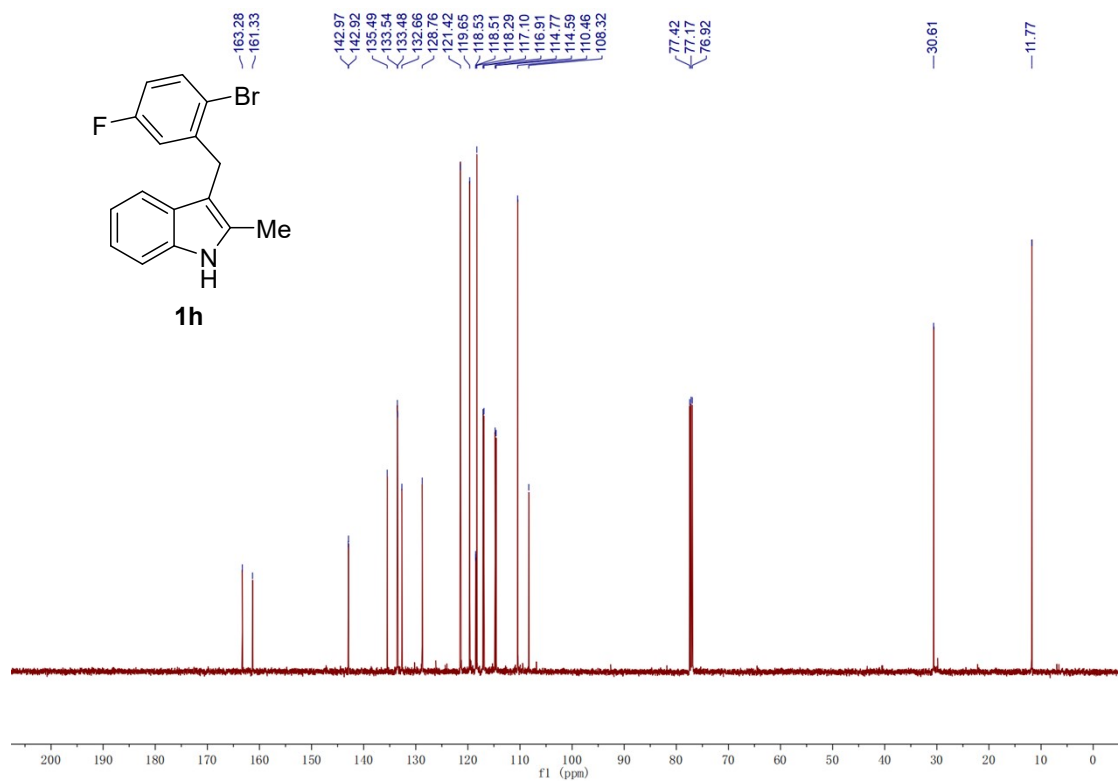

$^{19}\text{F}$  NMR (471 MHz,  $\text{CDCl}_3$ )

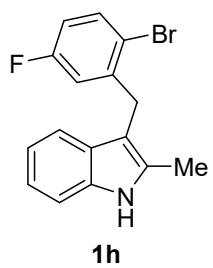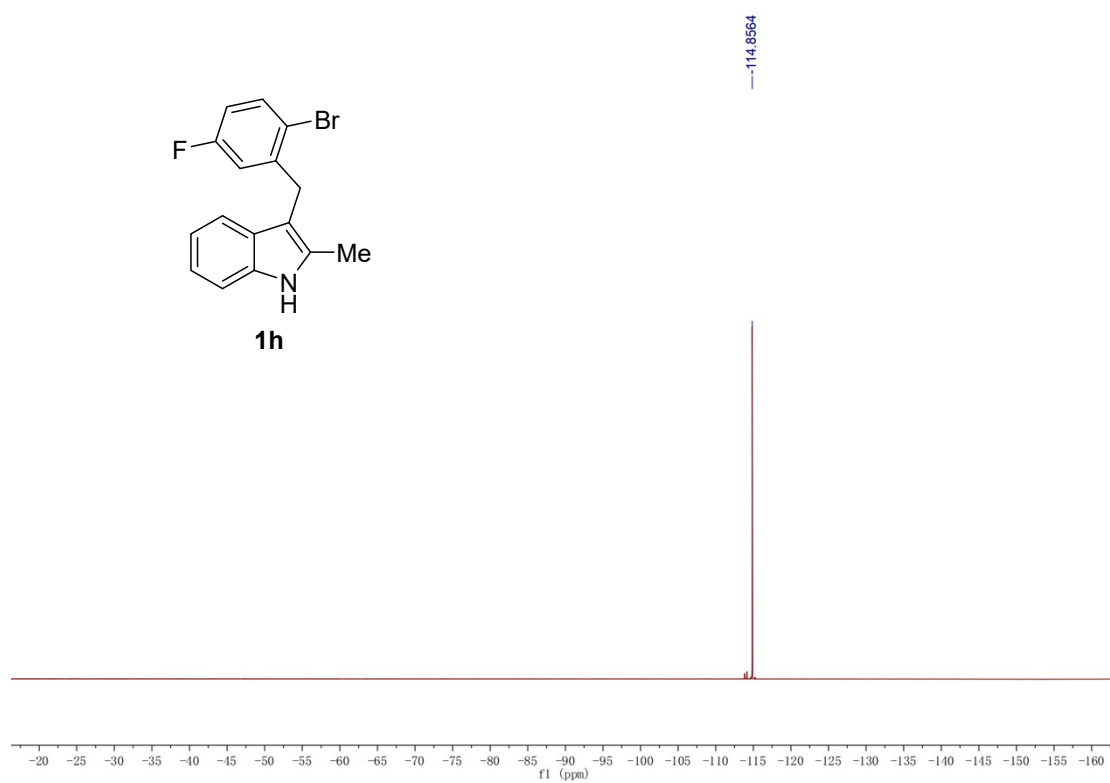

### 3-(2-bromo-3-chlorobenzyl)-2-methyl-1H-indole (1i)

$^1\text{H}$  NMR (500 MHz,  $\text{CDCl}_3$ )

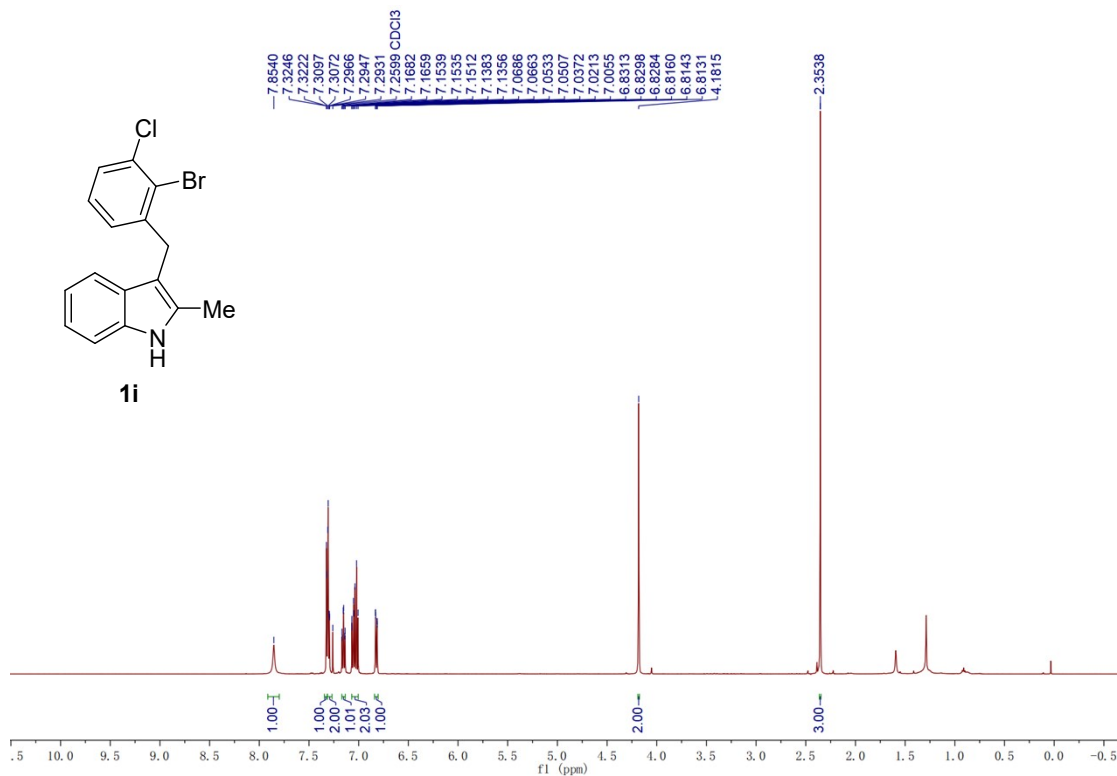

$^{13}\text{C}\{^1\text{H}\}$  NMR (125 MHz,  $\text{CDCl}_3$ )

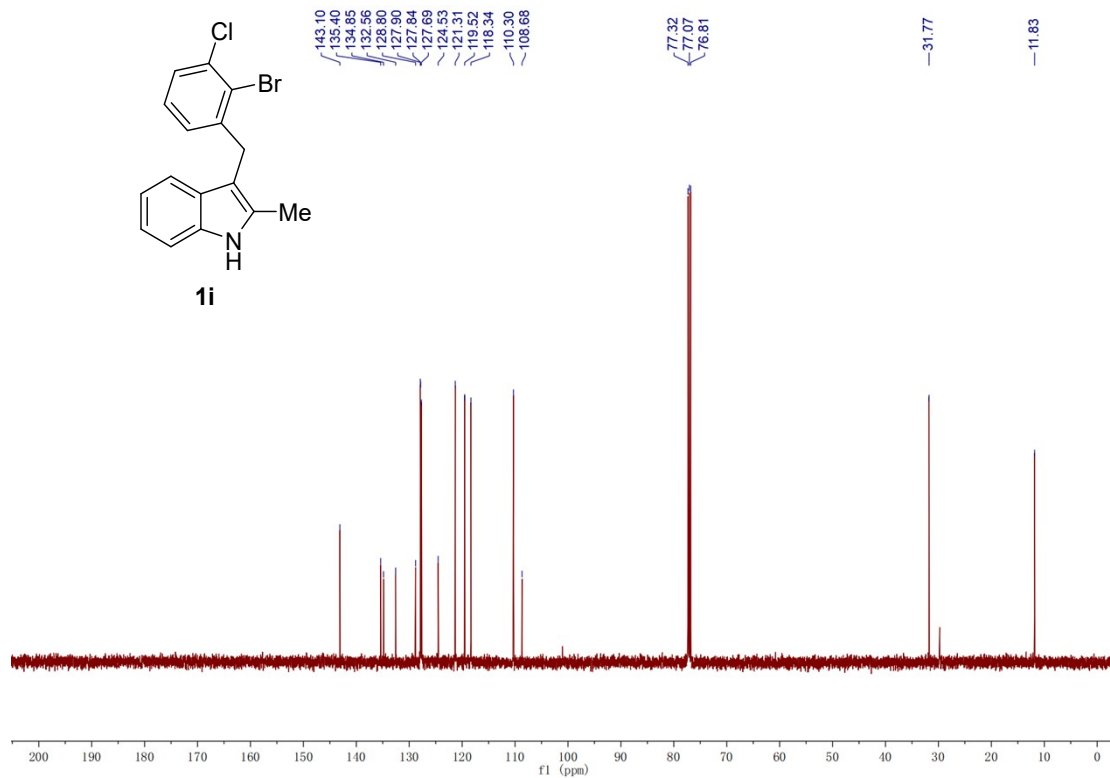

### 3-(2-bromo-5-nitrobenzyl)-2-methyl-1H-indole (1j)

$^1\text{H}$  NMR (500 MHz,  $\text{CDCl}_3$ )

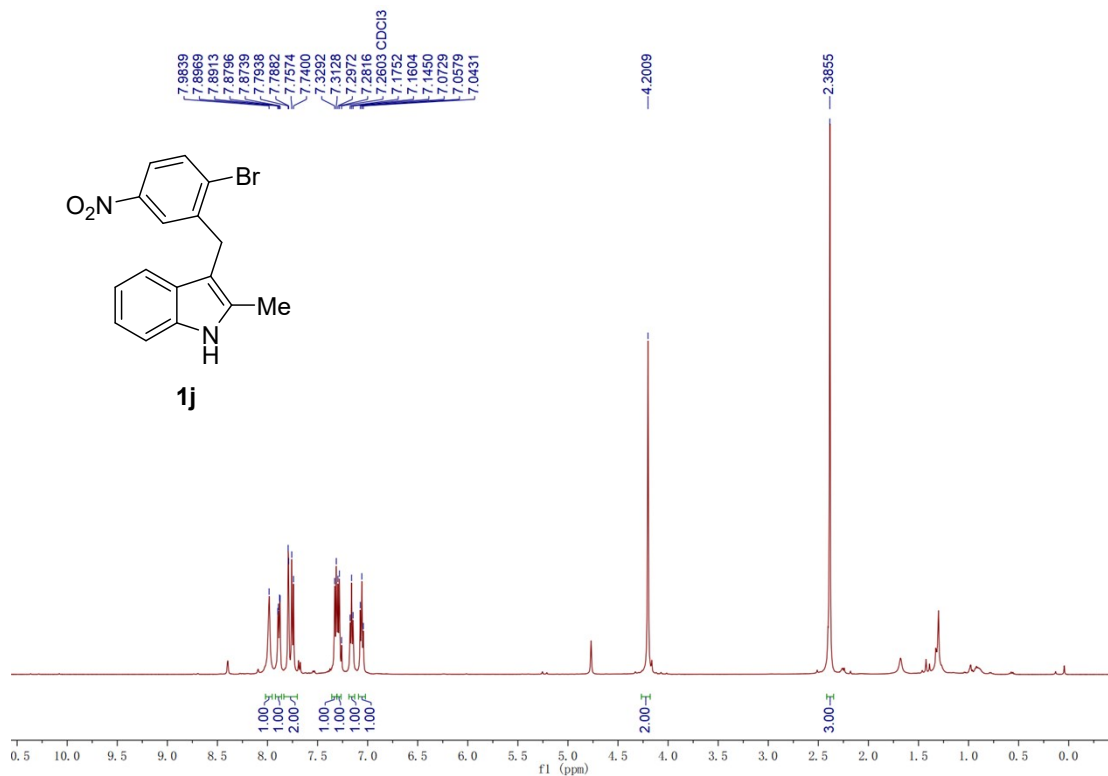

$^{13}\text{C}\{^1\text{H}\}$  NMR (125 MHz,  $\text{CDCl}_3$ )

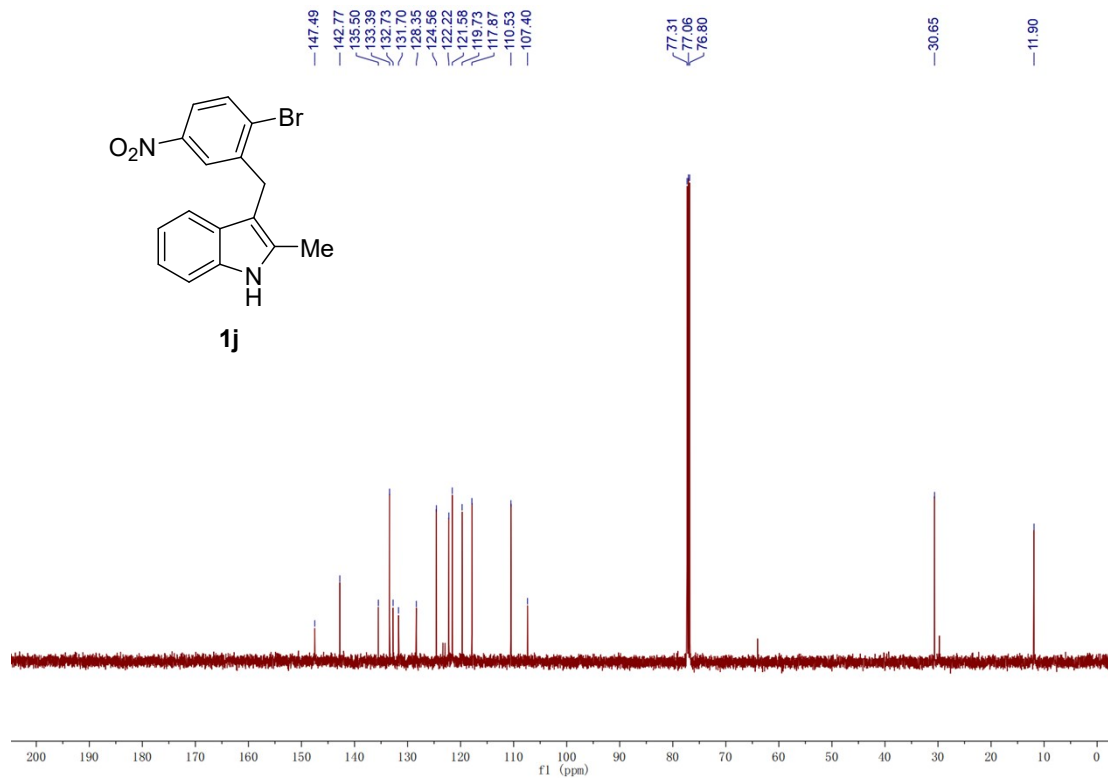

### 3-(2-bromo-4,5-dimethoxybenzyl)-2-methyl-1H-indole (1k)

$^1\text{H}$  NMR (500 MHz,  $\text{CDCl}_3$ )

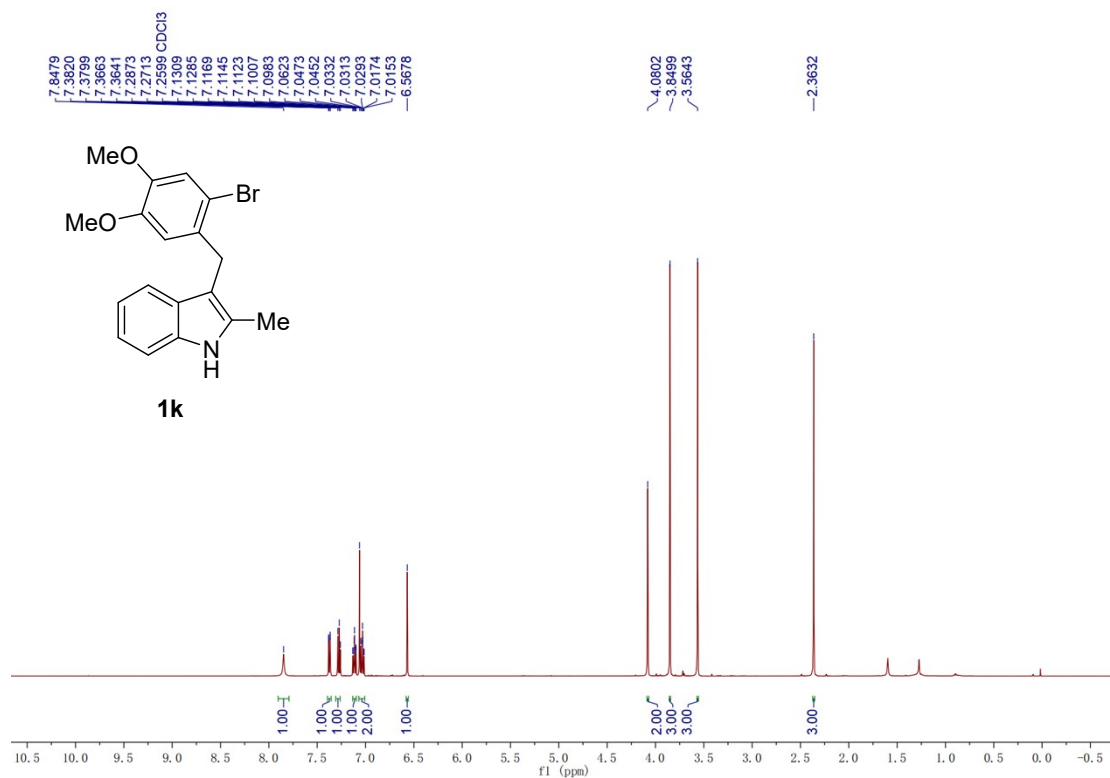

$^{13}\text{C}\{^1\text{H}\}$  NMR (125 MHz,  $\text{CDCl}_3$ )

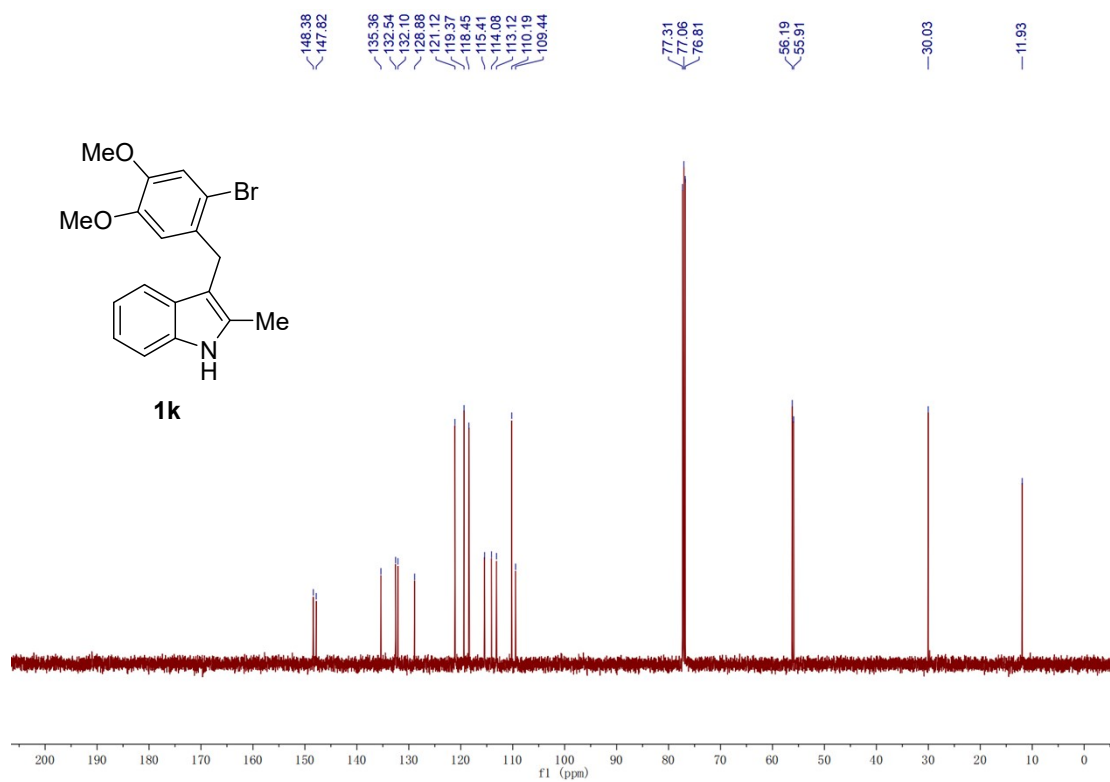



### 3-((1-bromonaphthalen-2-yl)methyl)-2-methyl-1H-indole (1I)

<sup>1</sup>H NMR (500 MHz, CDCl<sub>3</sub>)

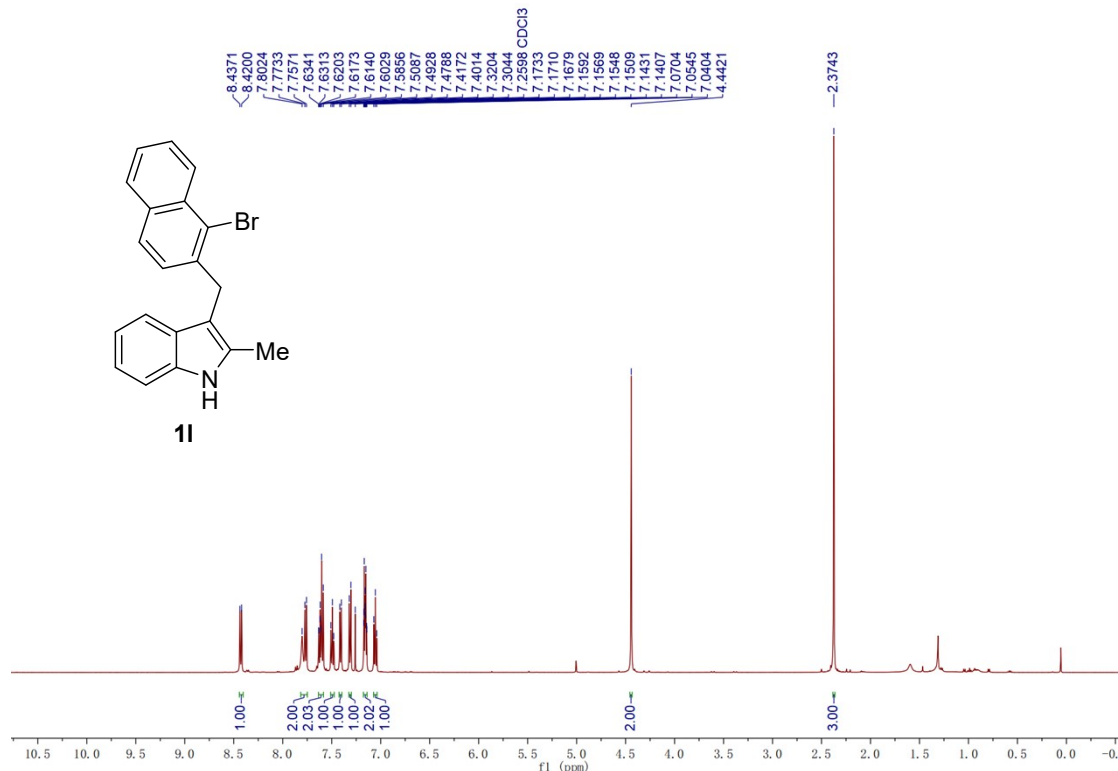

<sup>13</sup>C{<sup>1</sup>H} NMR (125 MHz, CDCl<sub>3</sub>)

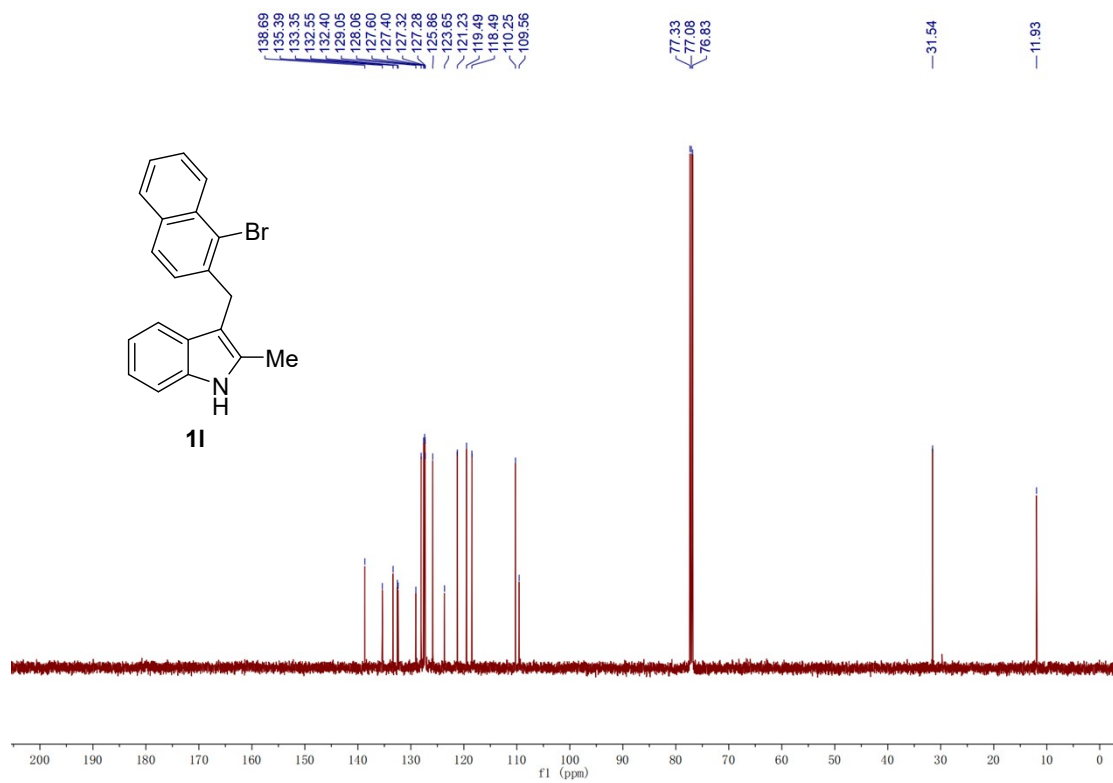

### 3-(2-bromophenyl)-2,5-dimethyl-1H-indole (1m)

$^1\text{H}$  NMR (500 MHz,  $\text{CDCl}_3$ )

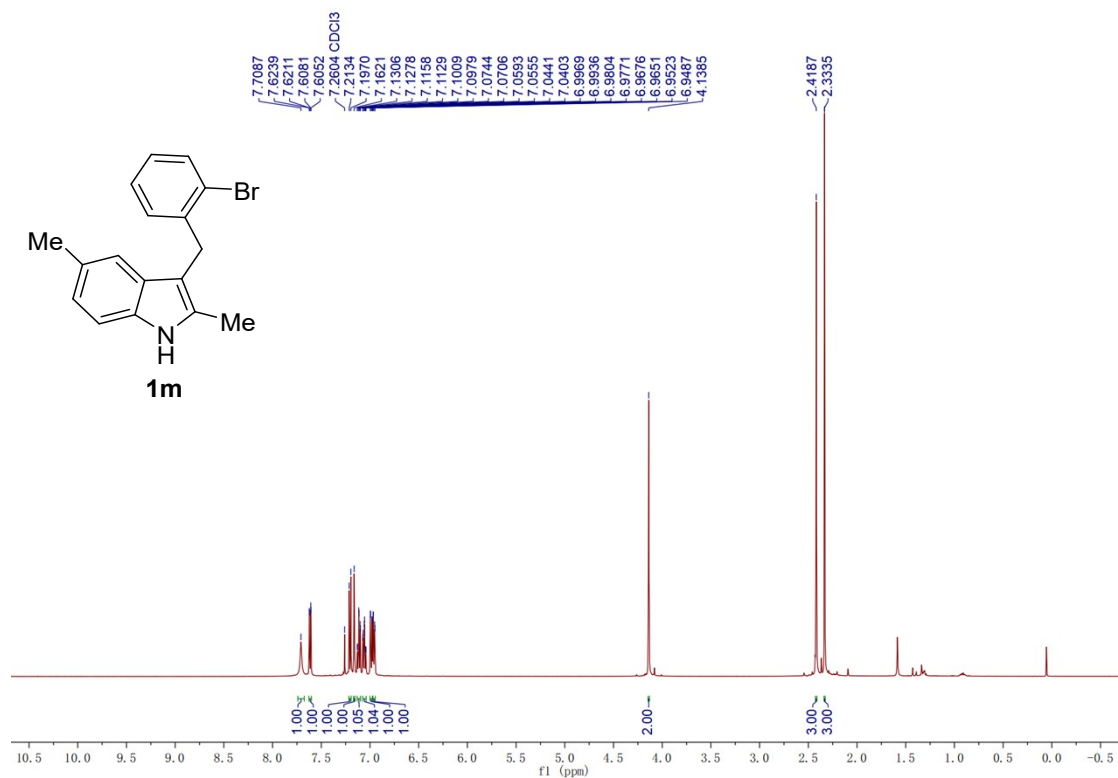

$^{13}\text{C}\{^1\text{H}\}$  NMR (125 MHz,  $\text{CDCl}_3$ )

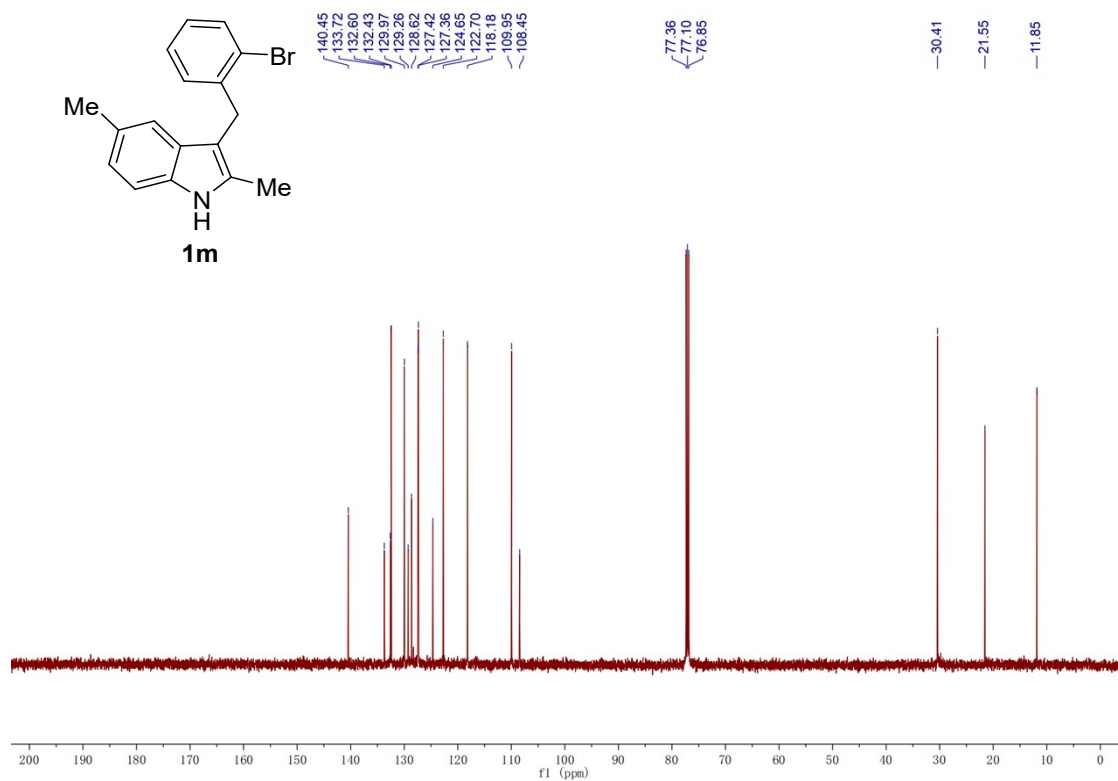

### 3-(2-bromobenzyl)-5-methoxy-2-methyl-1H-indole (1n)

$^1\text{H}$  NMR (500 MHz,  $\text{CDCl}_3$ )

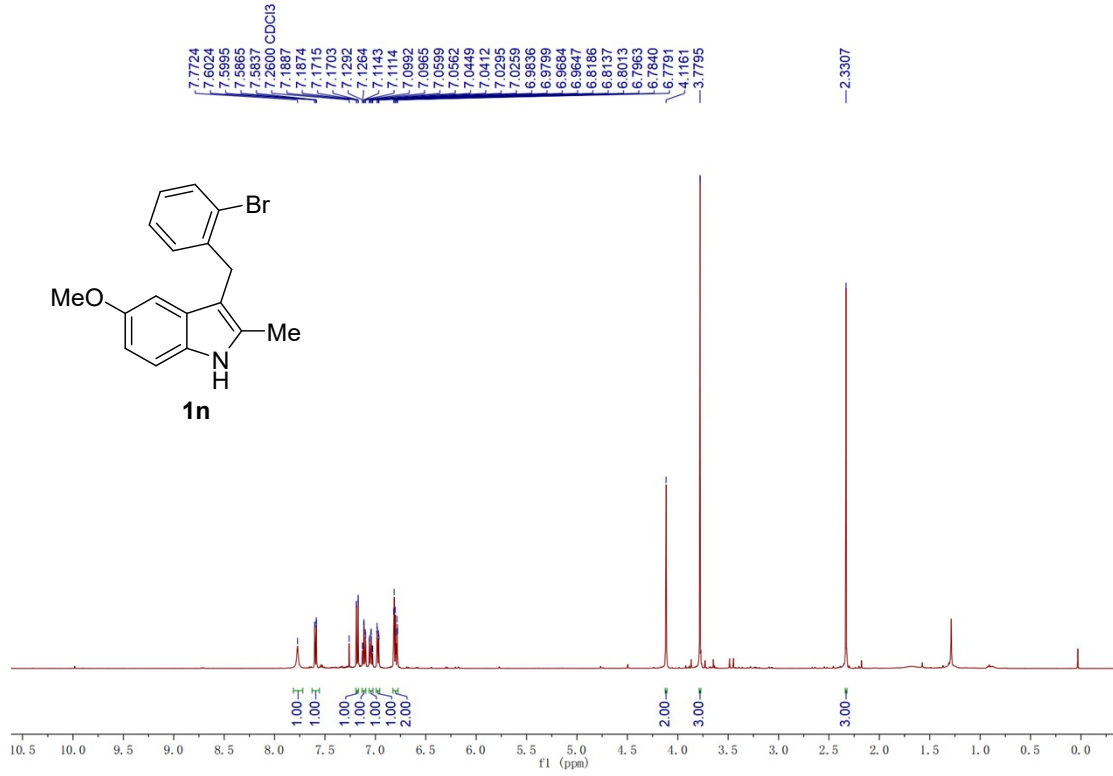

$^{13}\text{C}\{^1\text{H}\}$  NMR (125 MHz,  $\text{CDCl}_3$ )

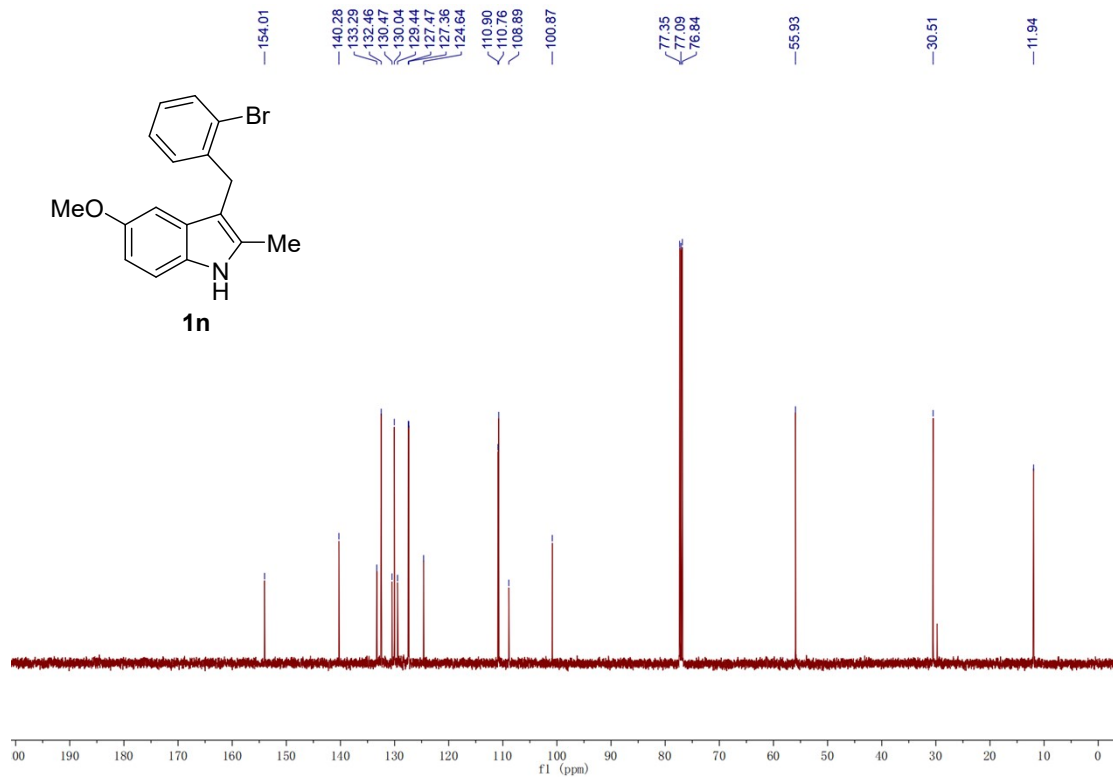

### 3-(2-bromobenzyl)-5-fluoro-2-methyl-1H-indole (1o)

$^1\text{H}$  NMR (500 MHz,  $\text{CDCl}_3$ )

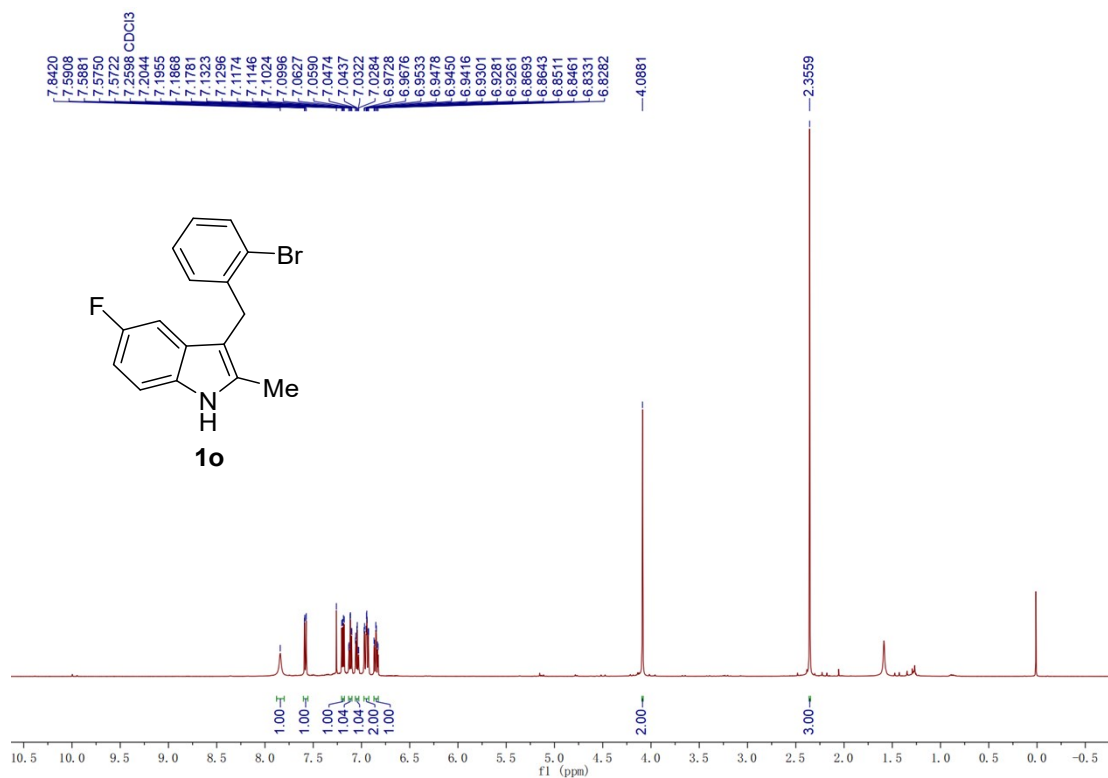

$^{13}\text{C}\{^1\text{H}\}$  NMR (125 MHz,  $\text{CDCl}_3$ )

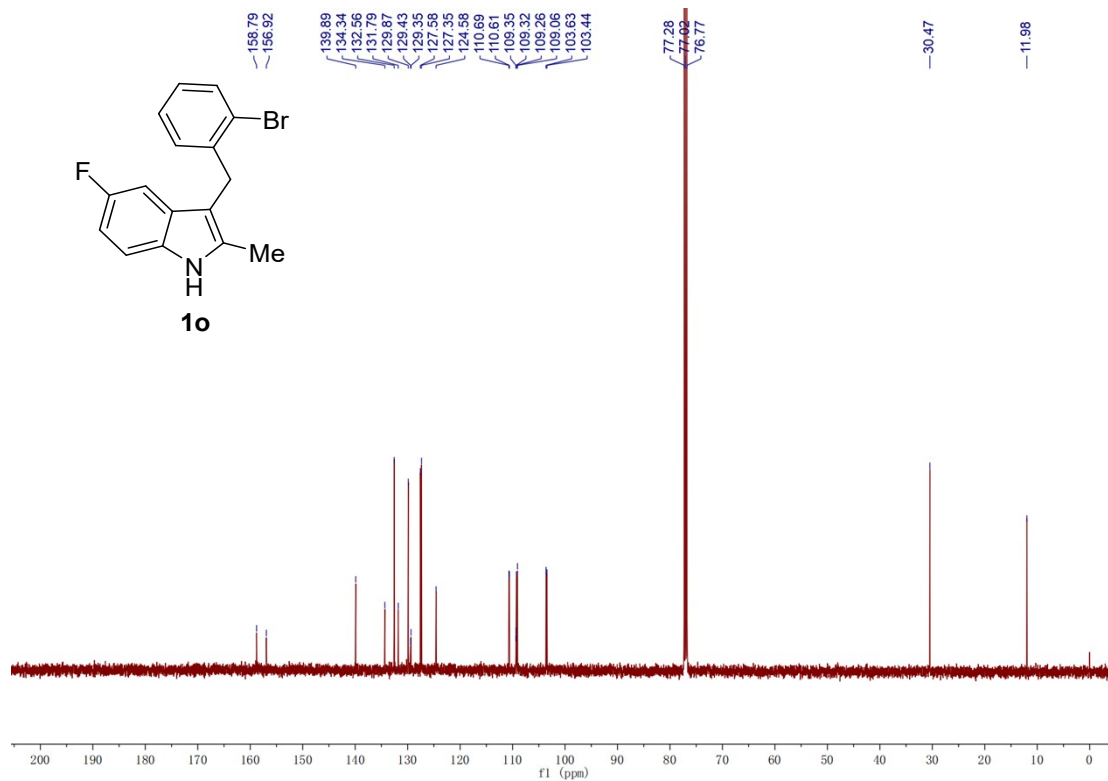

$^{19}\text{F}$  NMR (471 MHz,  $\text{CDCl}_3$ )

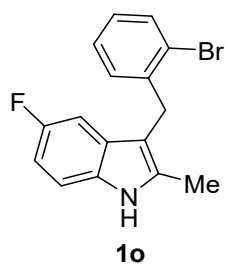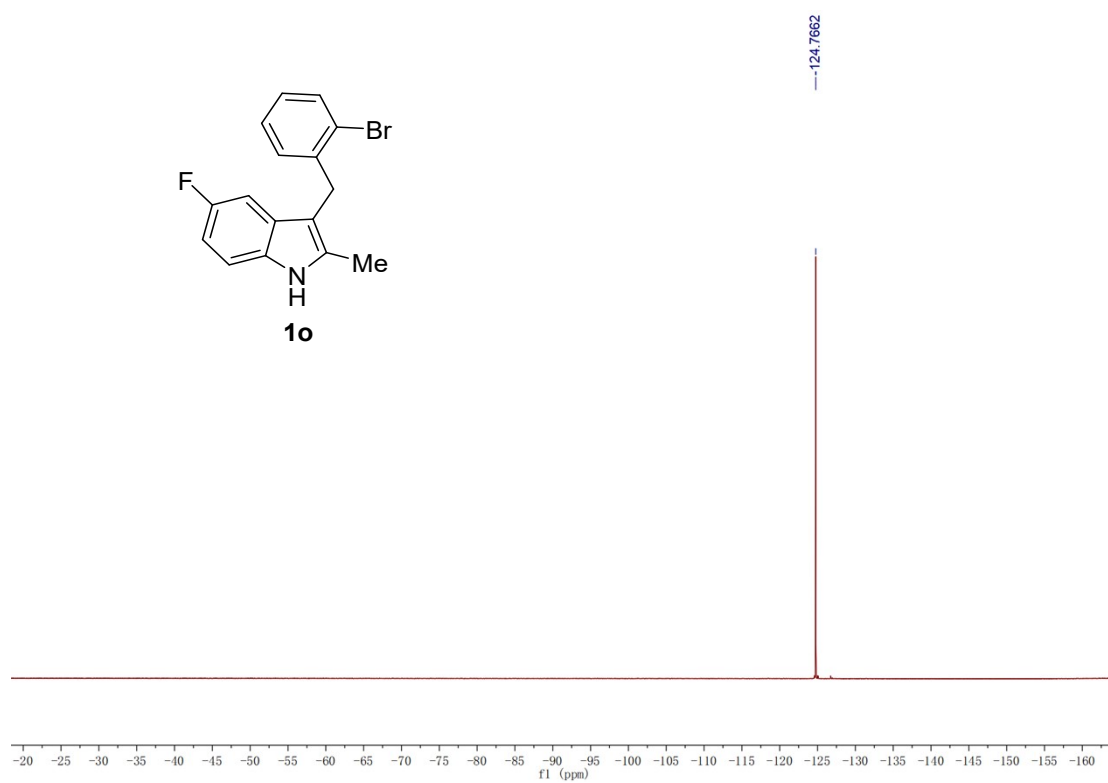

### 3-(2-bromobenzyl)-5-chloro-2-methyl-1H-indole (1p)

$^1\text{H}$  NMR (500 MHz,  $\text{CDCl}_3$ )

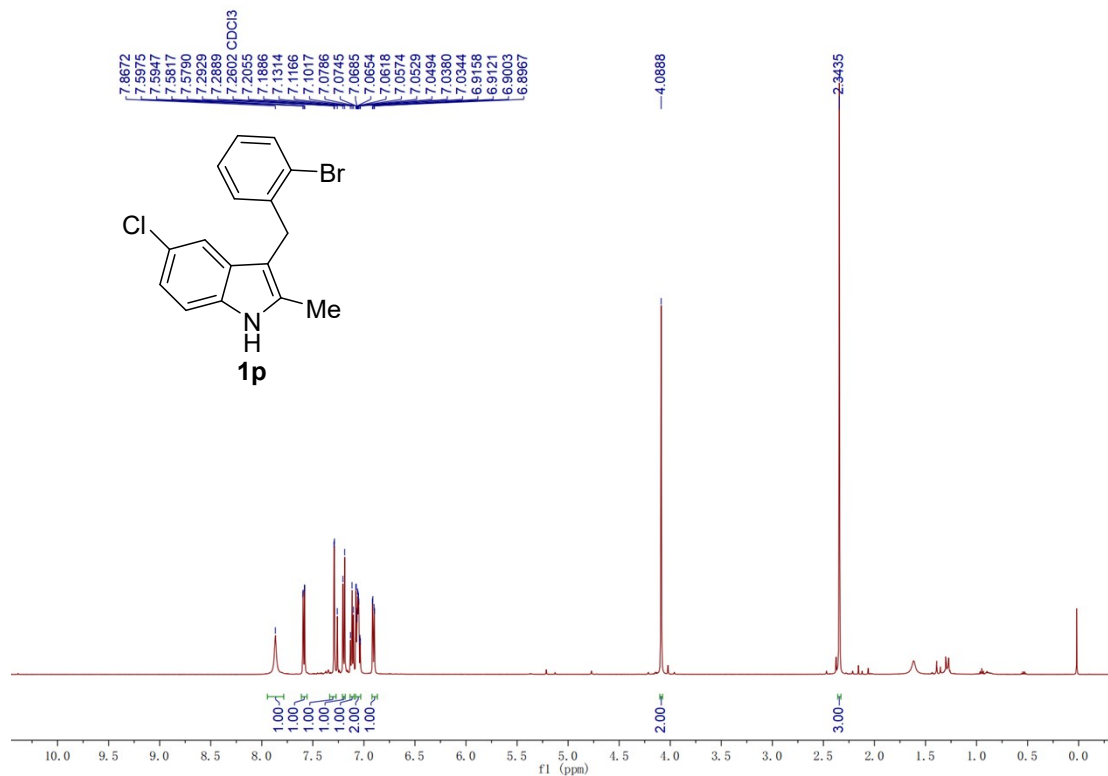

$^{13}\text{C}\{^1\text{H}\}$  NMR (125 MHz,  $\text{CDCl}_3$ )

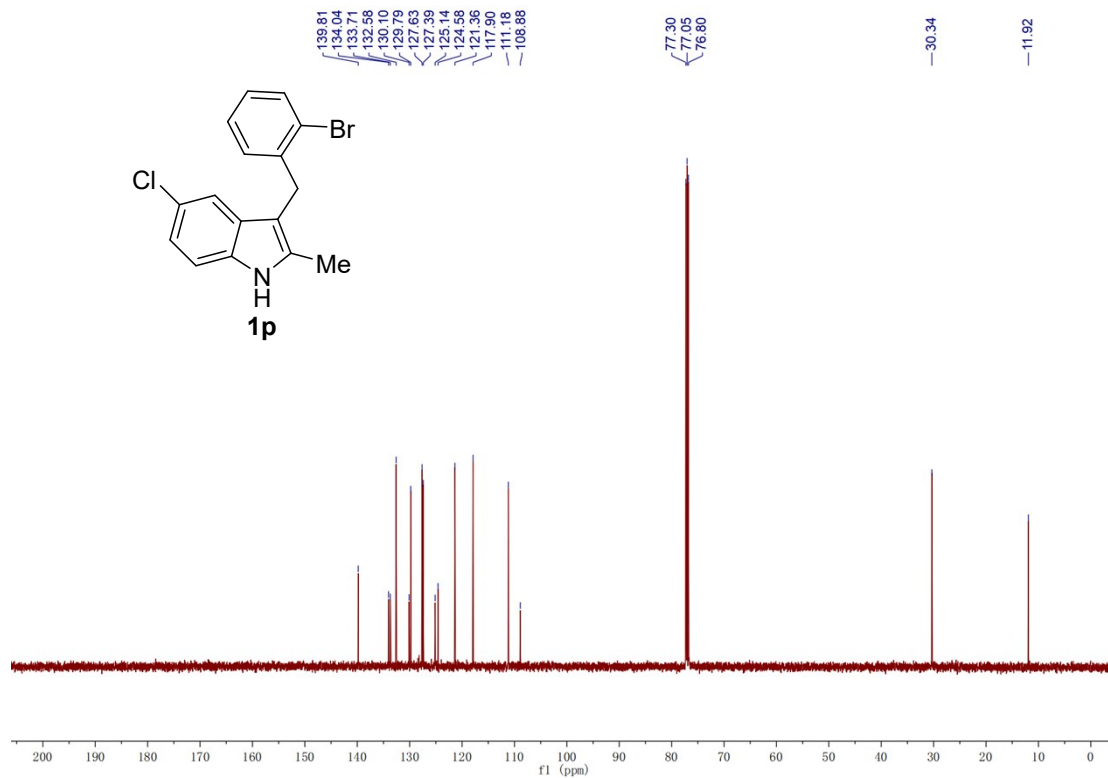

### 3-(2-bromobenzyl)-2-phenyl-1H-indole (1q)

$^1\text{H}$  NMR (500 MHz,  $\text{CDCl}_3$ )

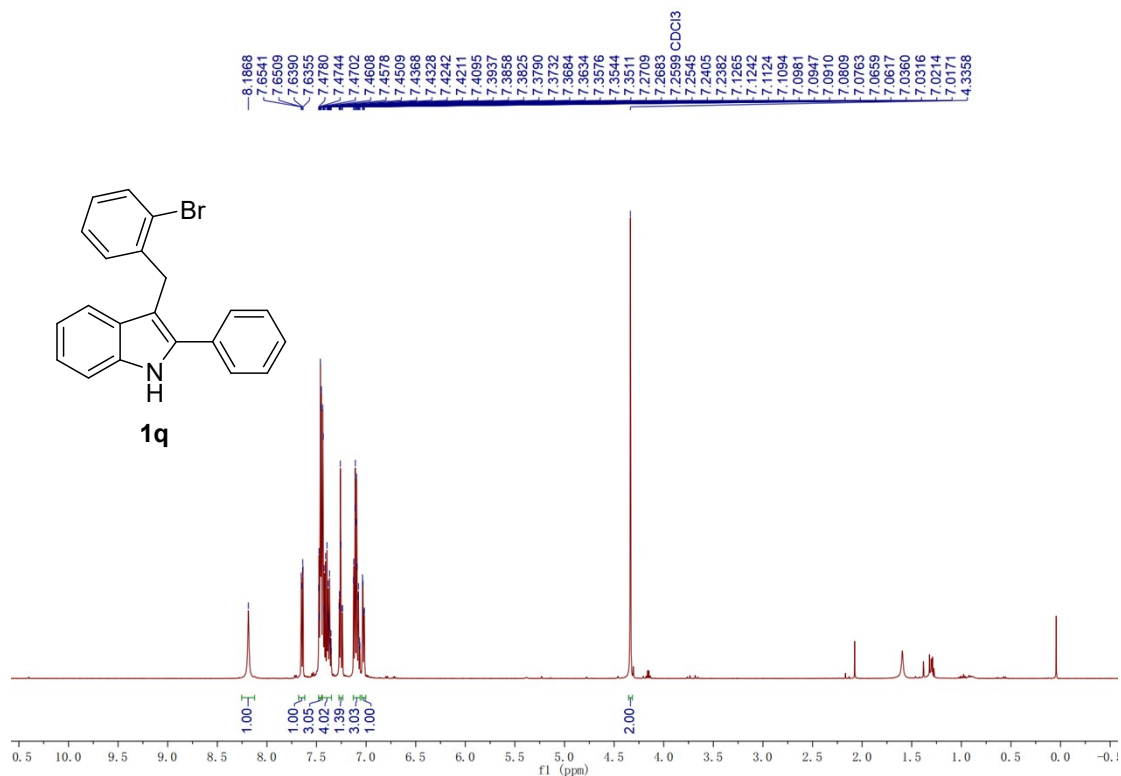

$^{13}\text{C}\{^1\text{H}\}$  NMR (125 MHz,  $\text{CDCl}_3$ )

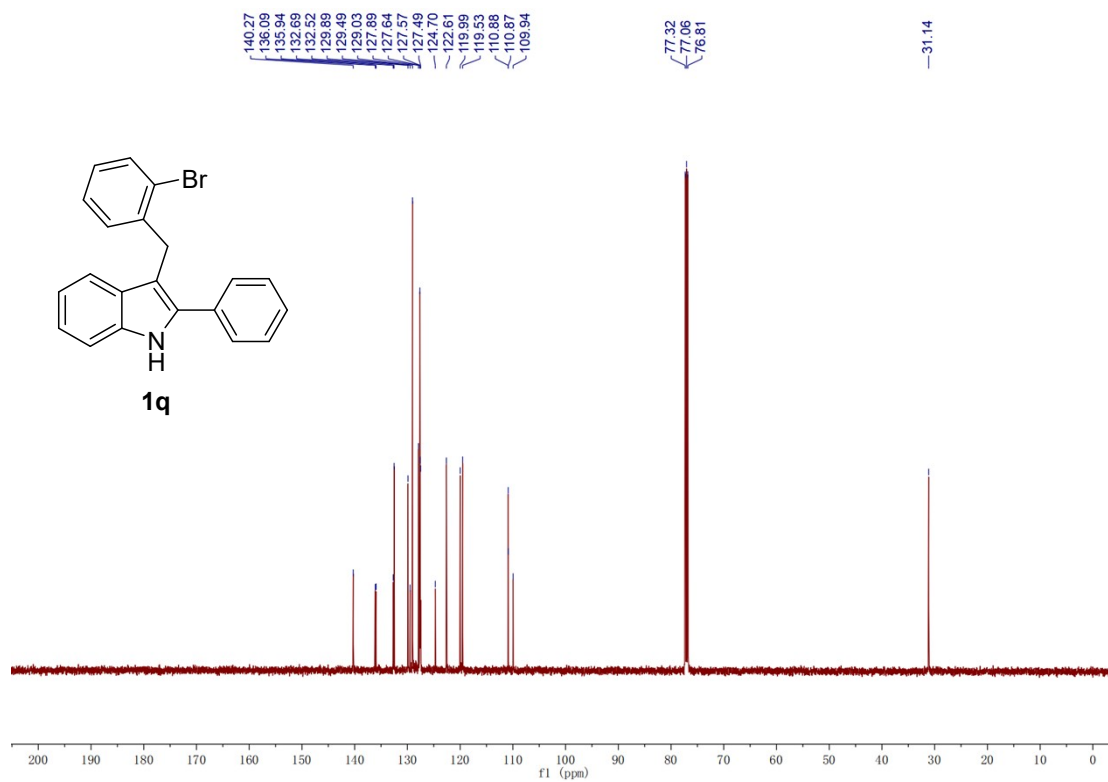

### 3-(2-bromobenzyl)-2-(4-fluorophenyl)-1H-indole (1r)

$^1\text{H}$  NMR (500 MHz,  $\text{CDCl}_3$ )

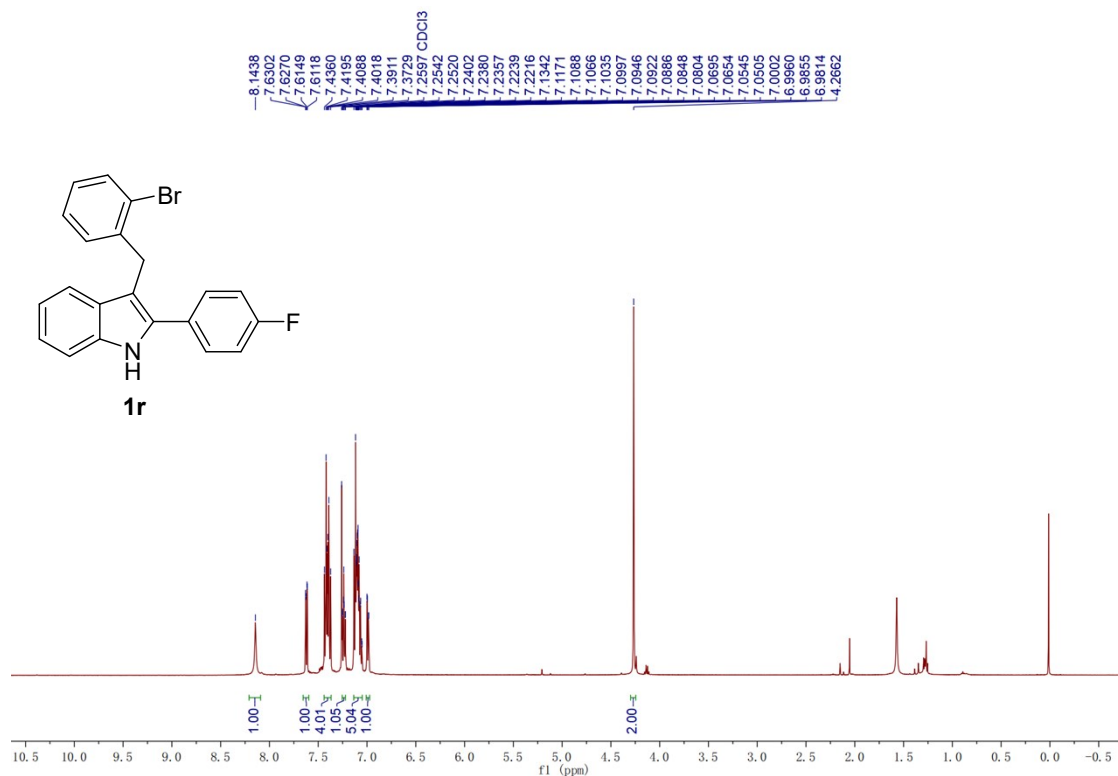

$^{13}\text{C}\{^1\text{H}\}$  NMR (125 MHz,  $\text{CDCl}_3$ )

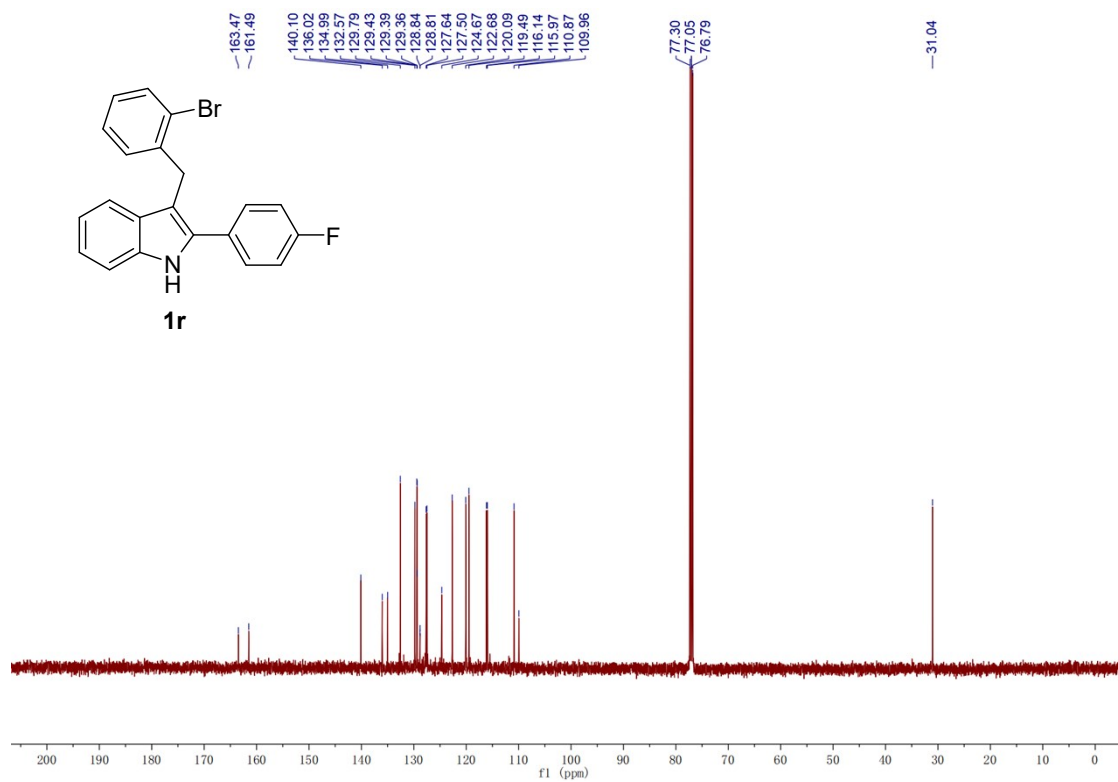



### 3-(2-bromobenzyl)-1H-indole (1s)

<sup>1</sup>H NMR (500 MHz, CDCl<sub>3</sub>)

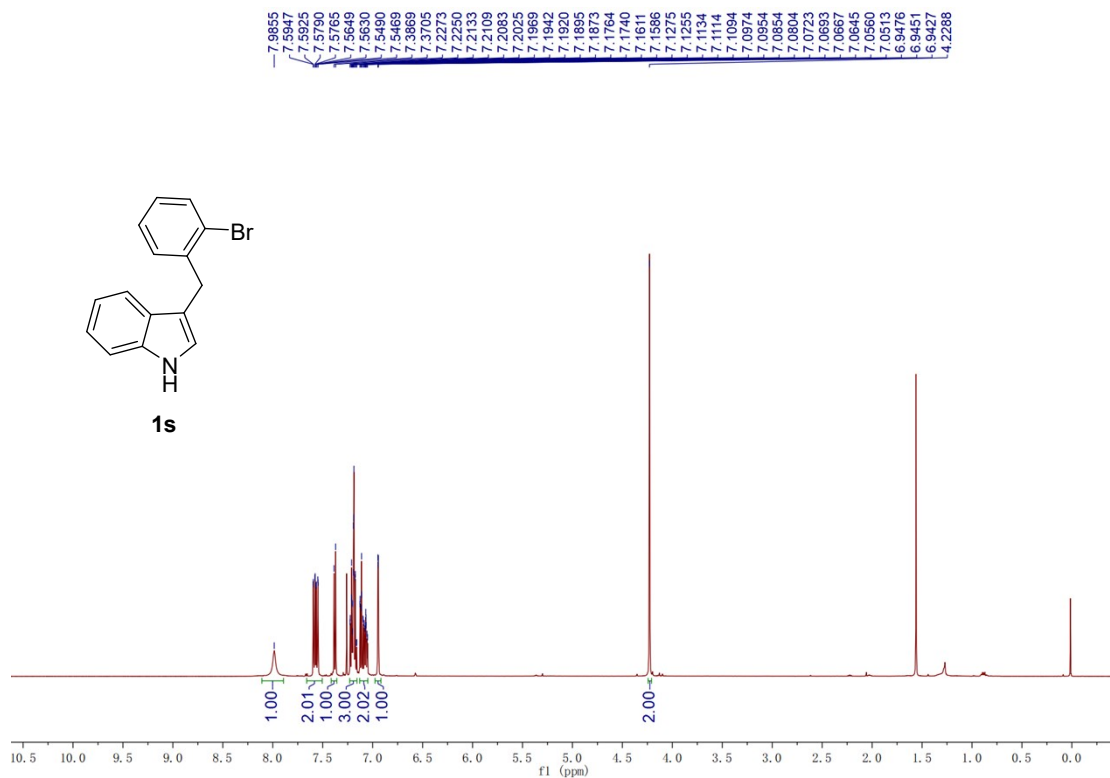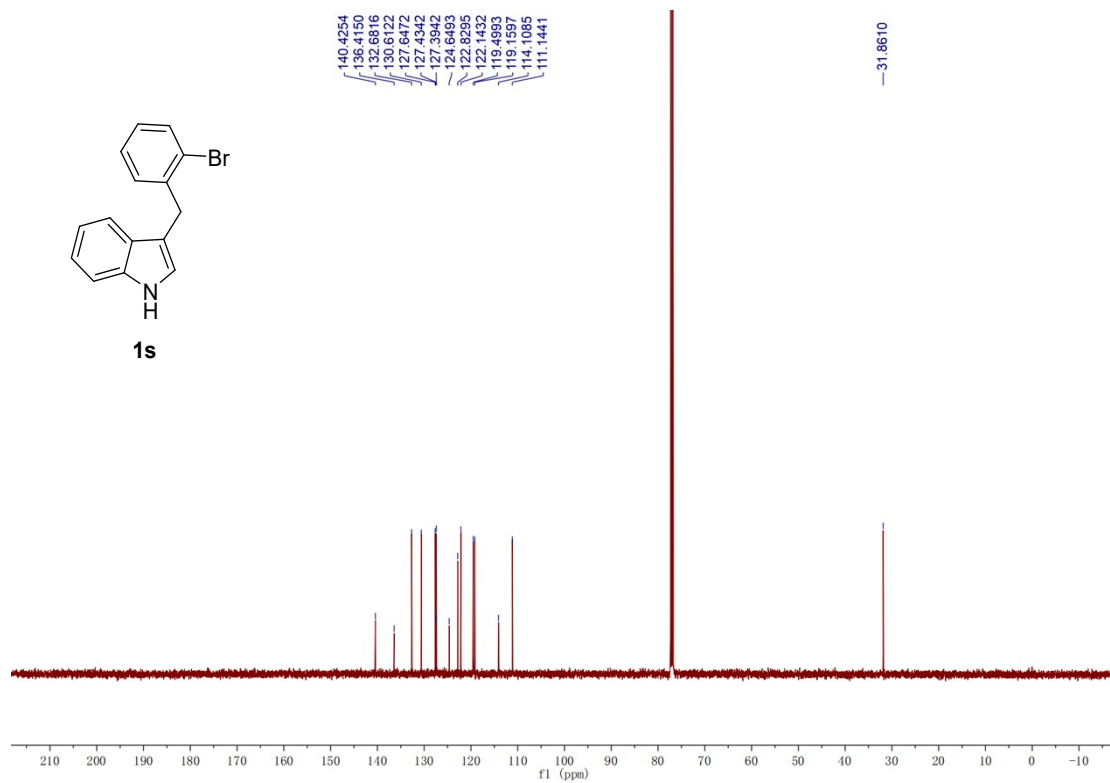

### 3-((4-bromothiophen-3-yl)methyl)-2-methyl-1H-indole (1t)

$^1\text{H}$  NMR (500 MHz,  $\text{CDCl}_3$ )

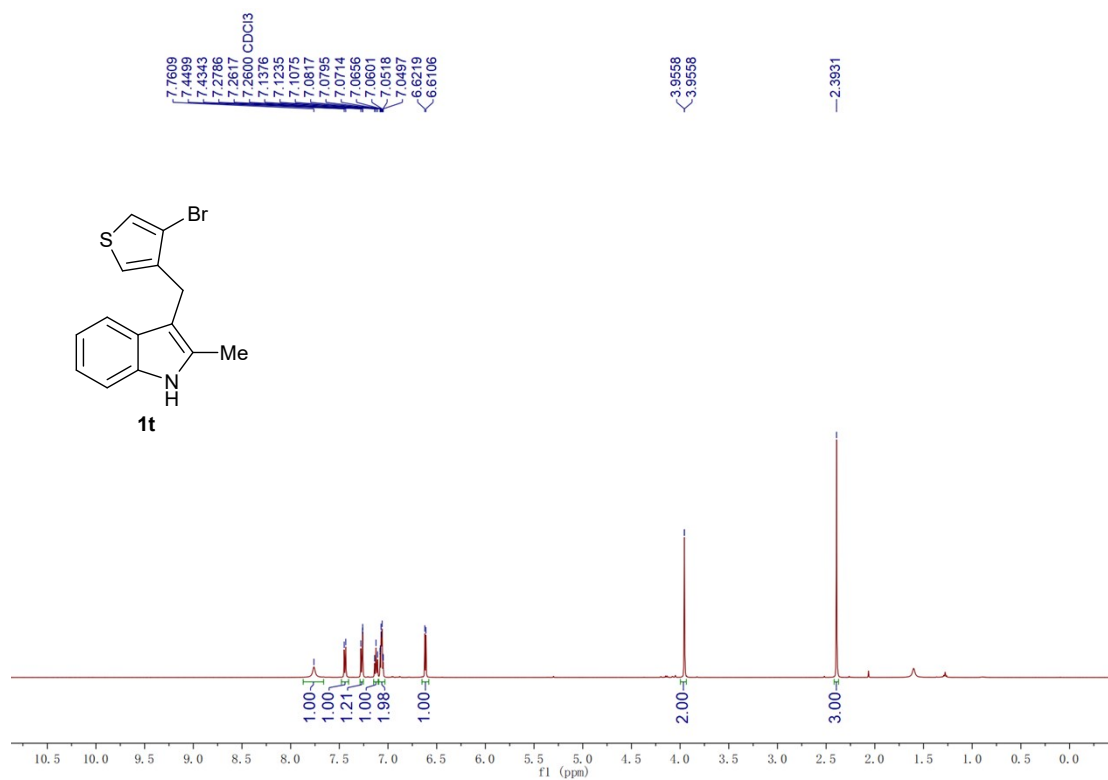

$^{13}\text{C}\{^1\text{H}\}$  NMR (125 MHz,  $\text{CDCl}_3$ )

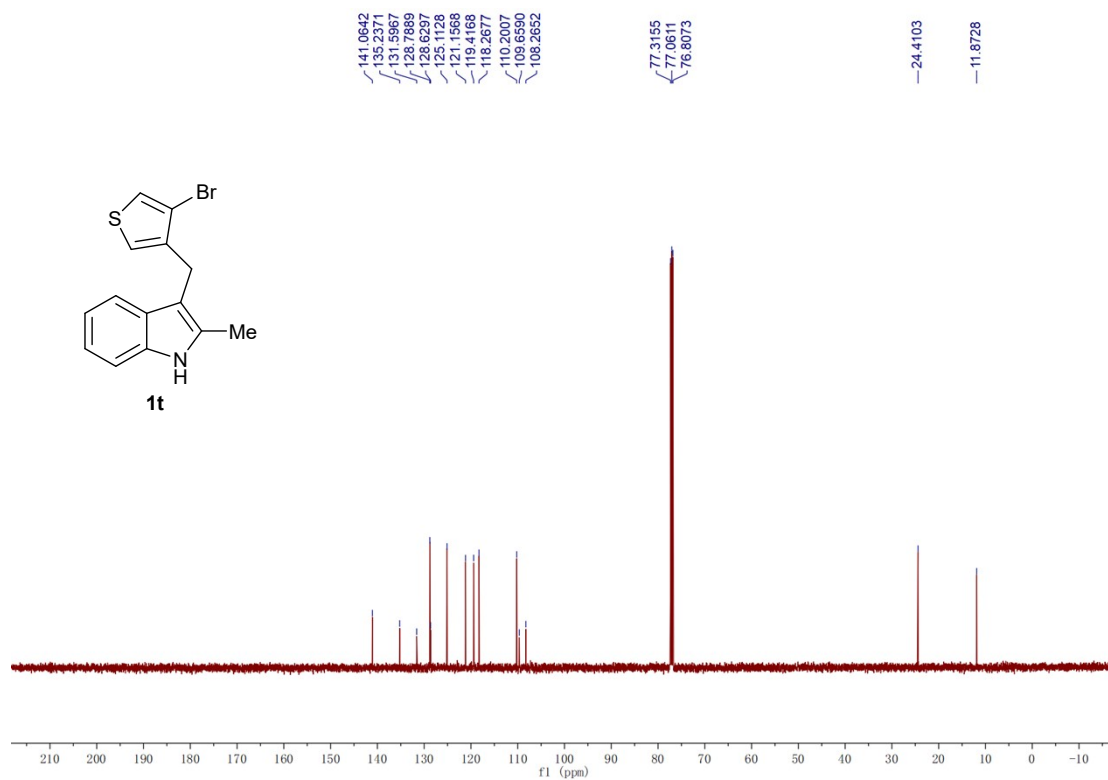

# 2'-methylspiro[indene-2,3'-indol]-1(3H)-one (2a)

$^1\text{H}$  NMR (500 MHz,  $\text{CDCl}_3$ )

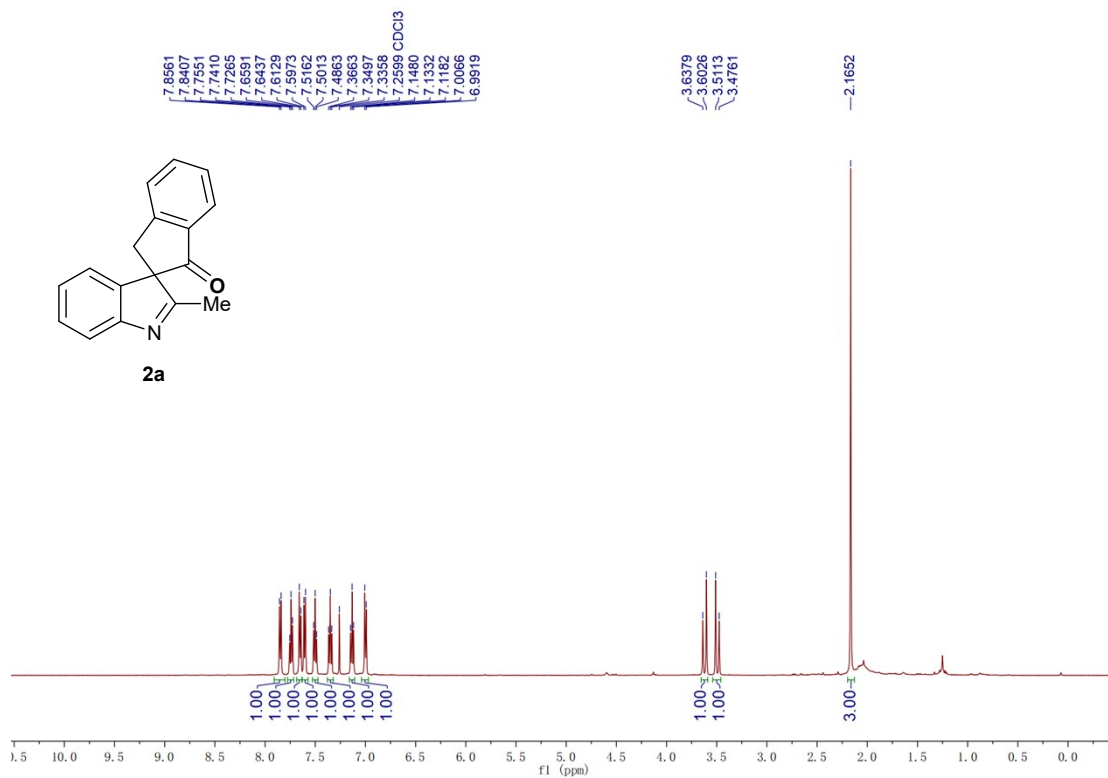

$^{13}\text{C}\{^1\text{H}\}$  NMR (125 MHz,  $\text{CDCl}_3$ )

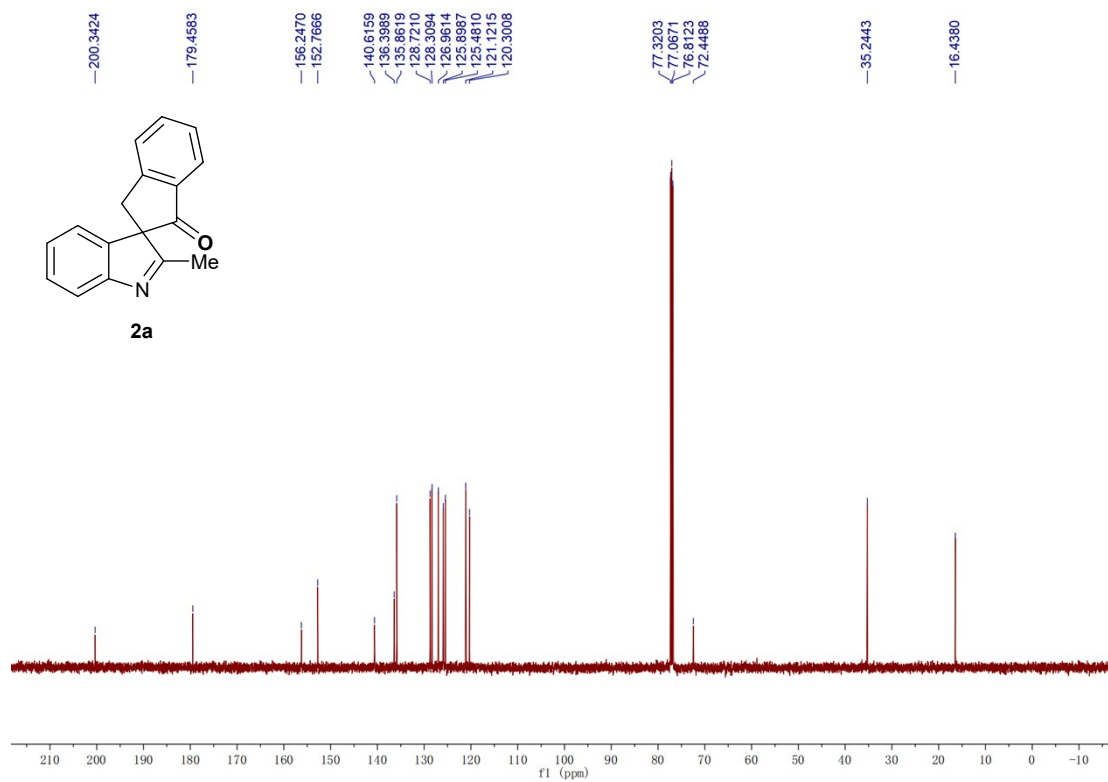

## 2',5-dimethylspiro[indene-2,3'-indol]-1(3H)-one (2b)

$^1\text{H}$  NMR (500 MHz,  $\text{CDCl}_3$ )

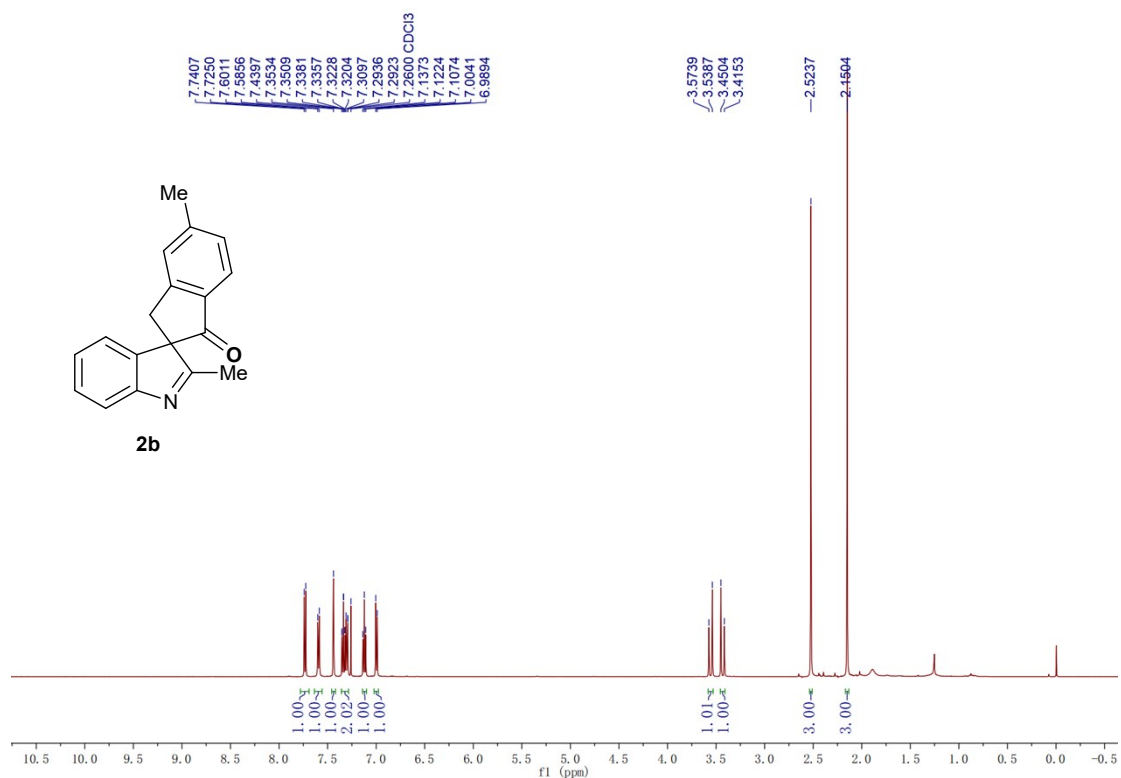

$^{13}\text{C}\{^1\text{H}\}$  NMR (125 MHz,  $\text{CDCl}_3$ )

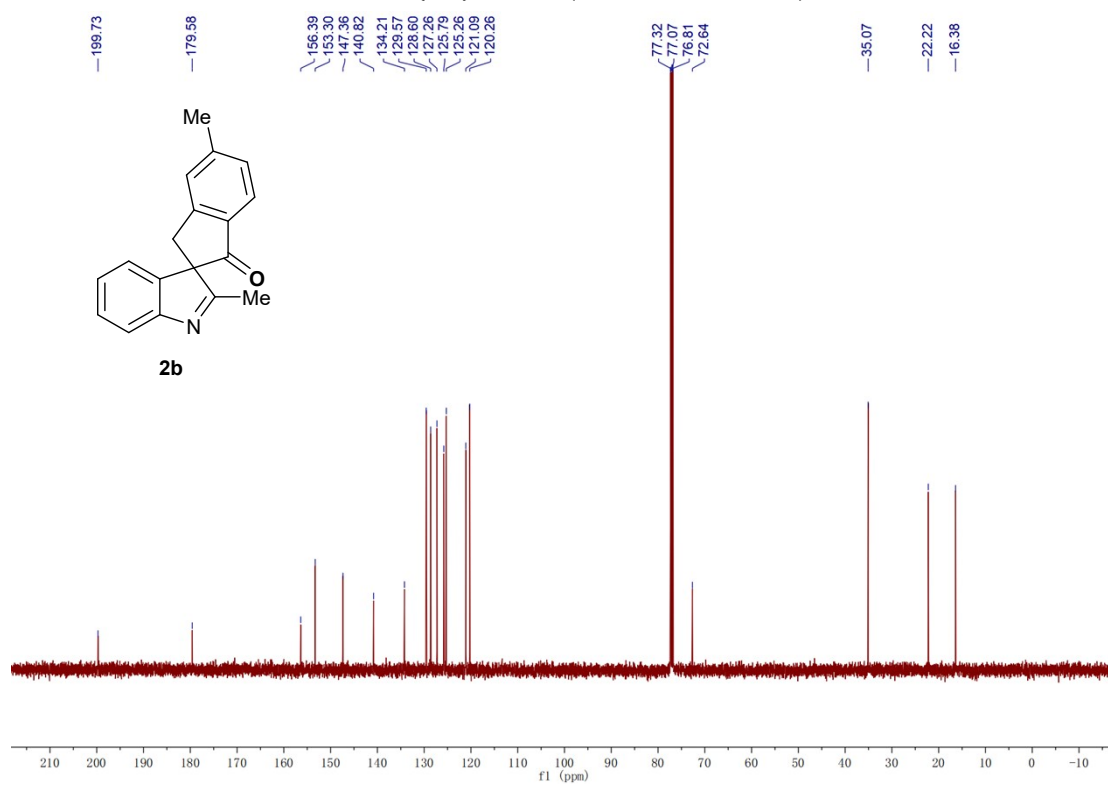

## 2',6-dimethylspiro[indene-2,3'-indol]-1(3H)-one (2c)

$^1\text{H}$  NMR (500 MHz,  $\text{CDCl}_3$ )

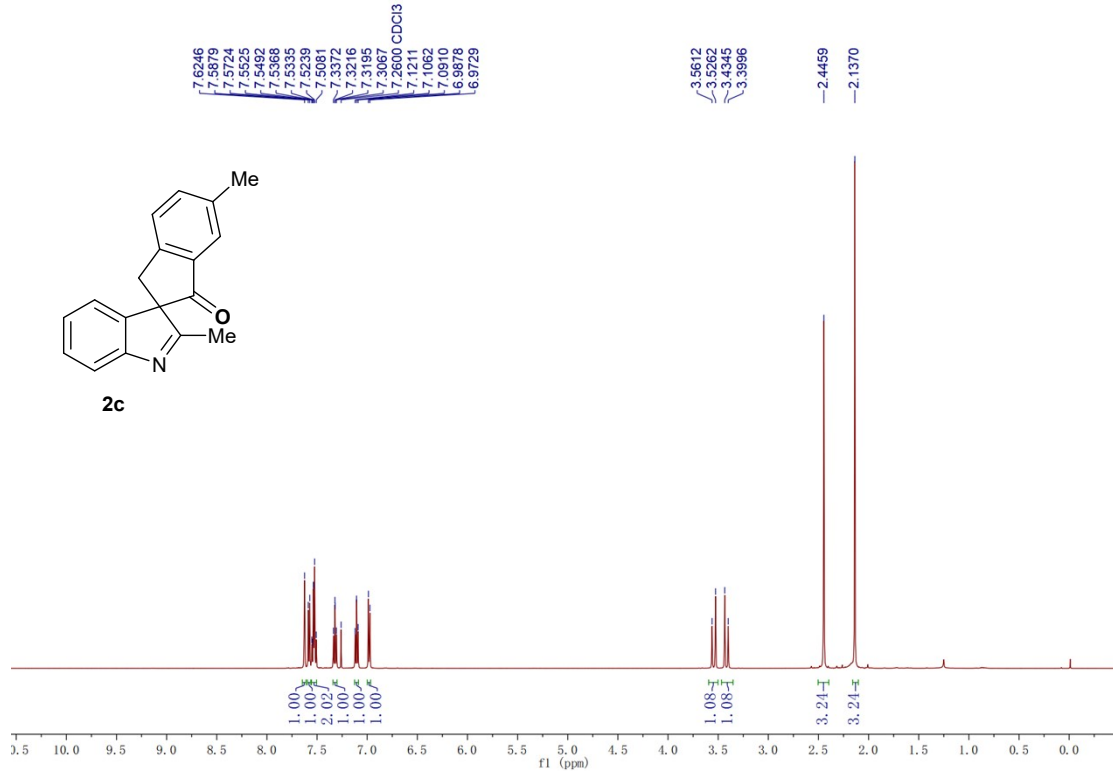

$^{13}\text{C}\{^1\text{H}\}$  NMR (125 MHz,  $\text{CDCl}_3$ )

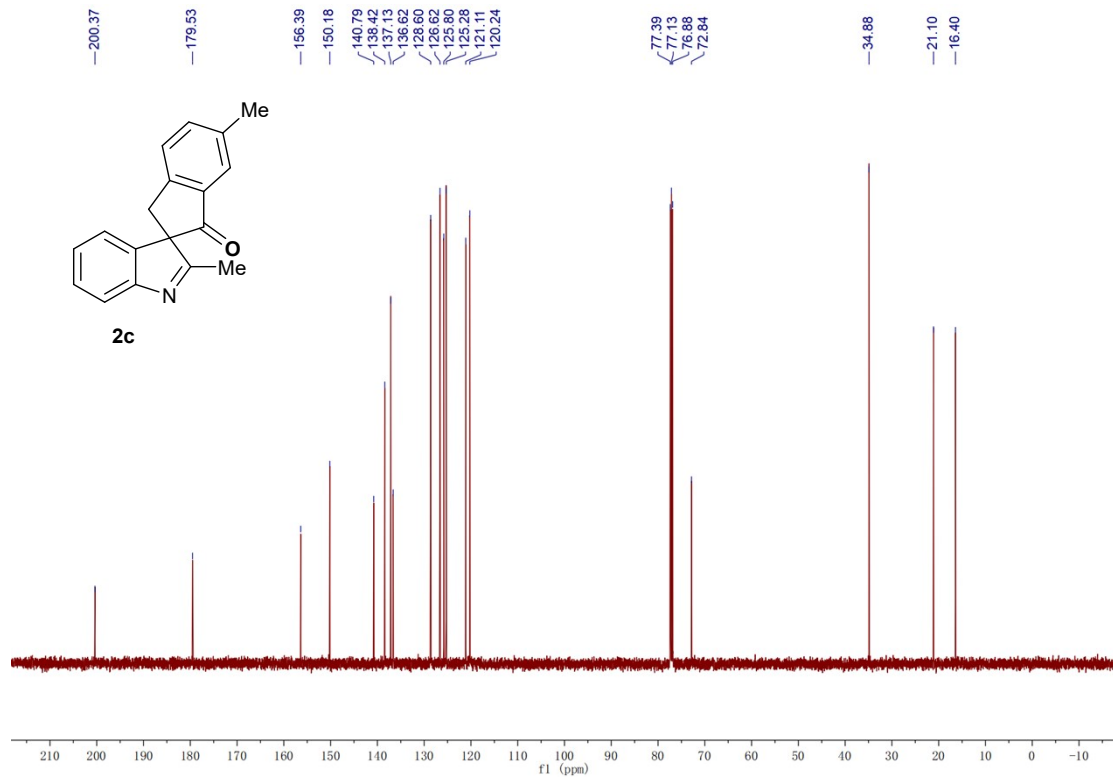

# 6-methoxy-2'-methylspiro[indene-2,3'-indol]-1(3*H*)-one (2d)

<sup>1</sup>H NMR (500 MHz, CDCl<sub>3</sub>)

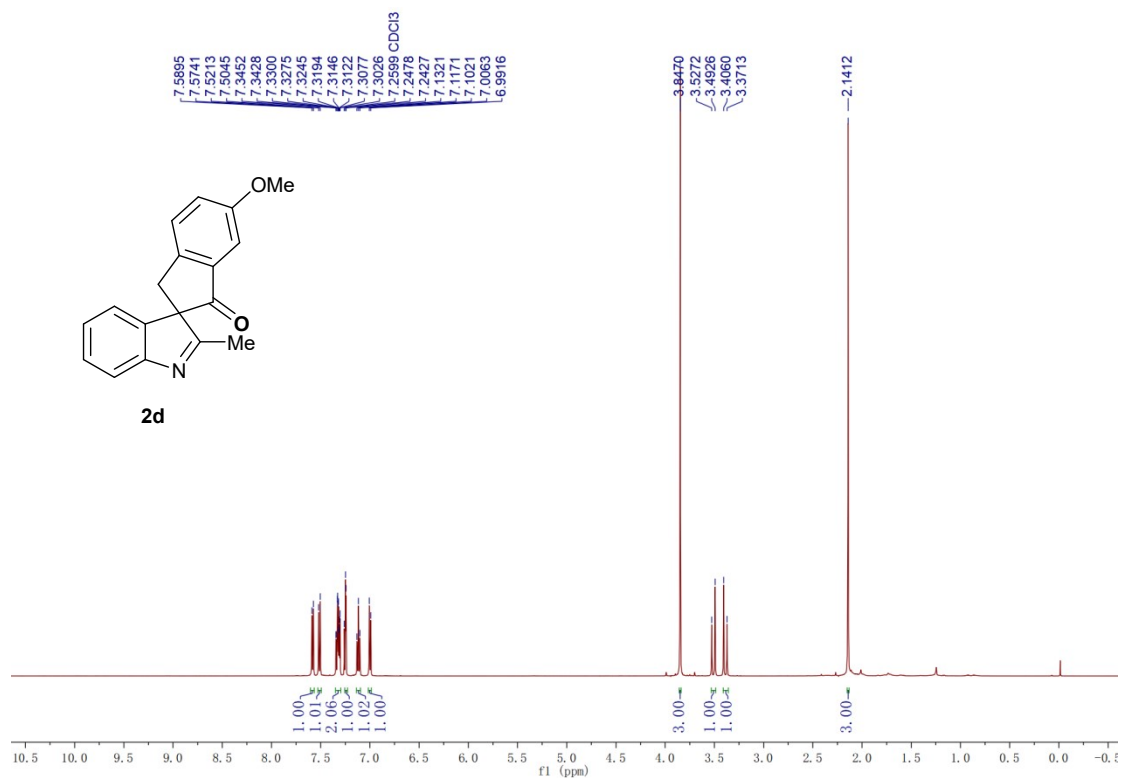

<sup>13</sup>C{<sup>1</sup>H} NMR (125 MHz, CDCl<sub>3</sub>)

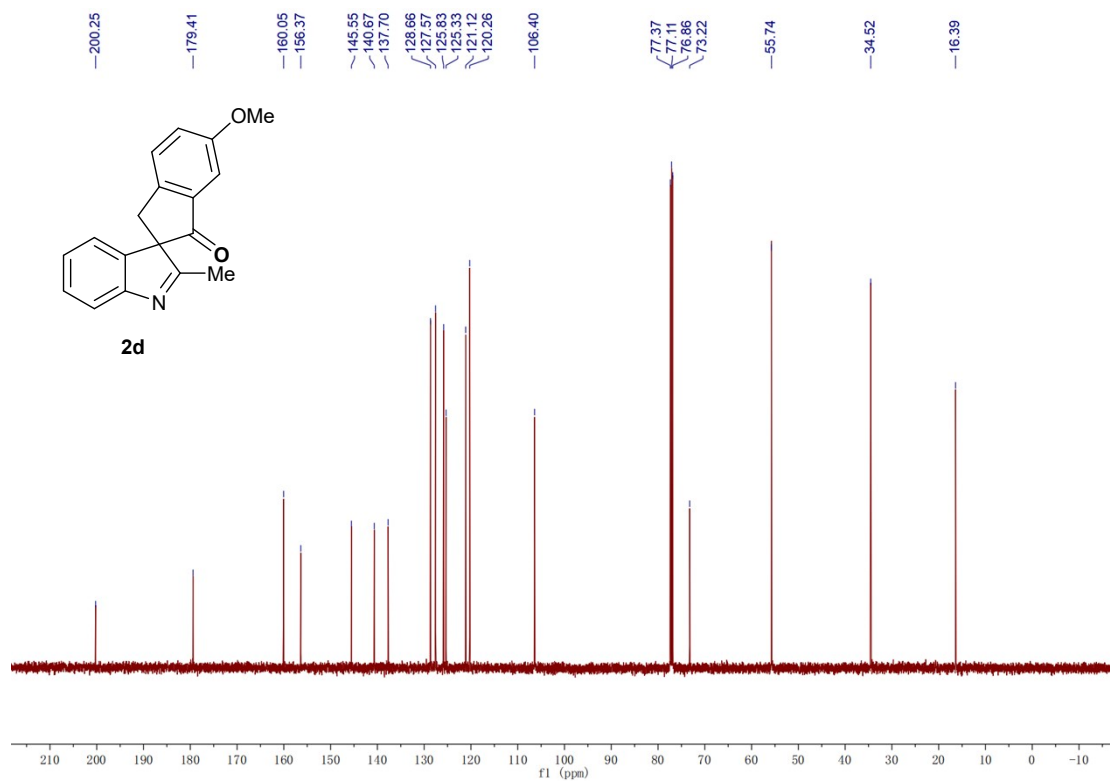

### 5-methoxy-2'-methylspiro[indene-2,3'-indol]-1(3*H*)-one (2e)

$^1\text{H}$  NMR (500 MHz,  $\text{CDCl}_3$ )

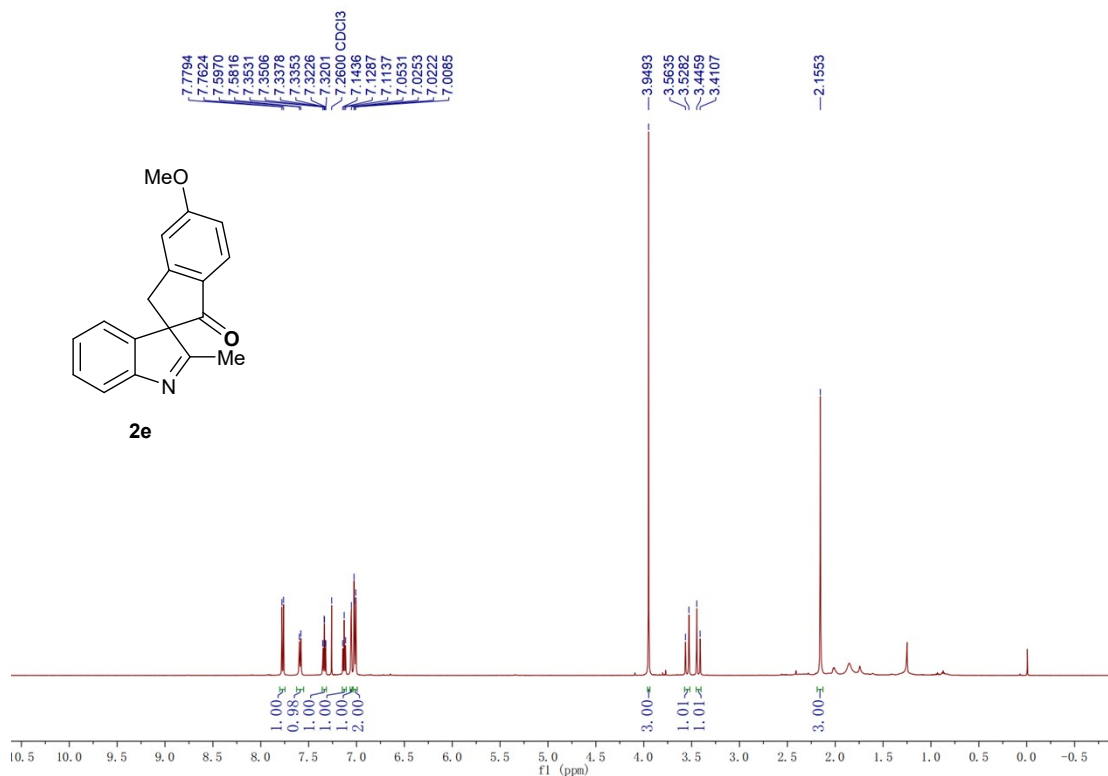

$^{13}\text{C}\{^1\text{H}\}$  NMR (125 MHz,  $\text{CDCl}_3$ )

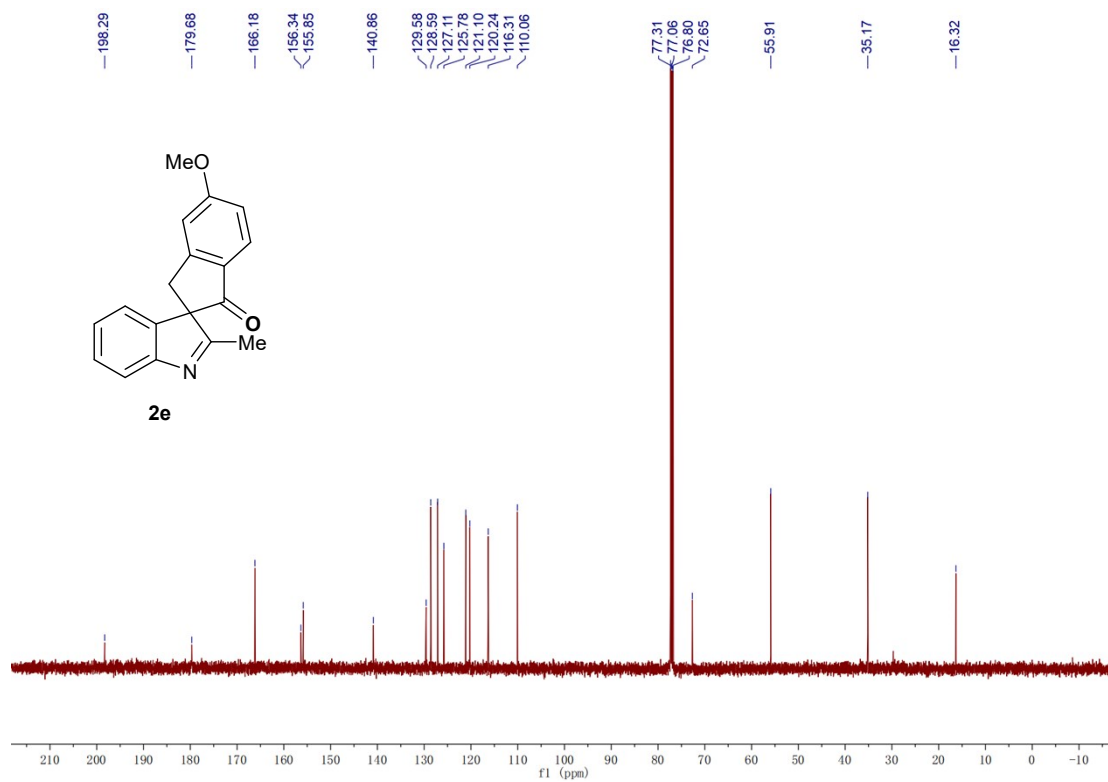

### 4-chloro-2'-methylspiro[indene-2,3'-indol]-1(3*H*)-one (2f)

$^1\text{H}$  NMR (500 MHz,  $\text{CDCl}_3$ )

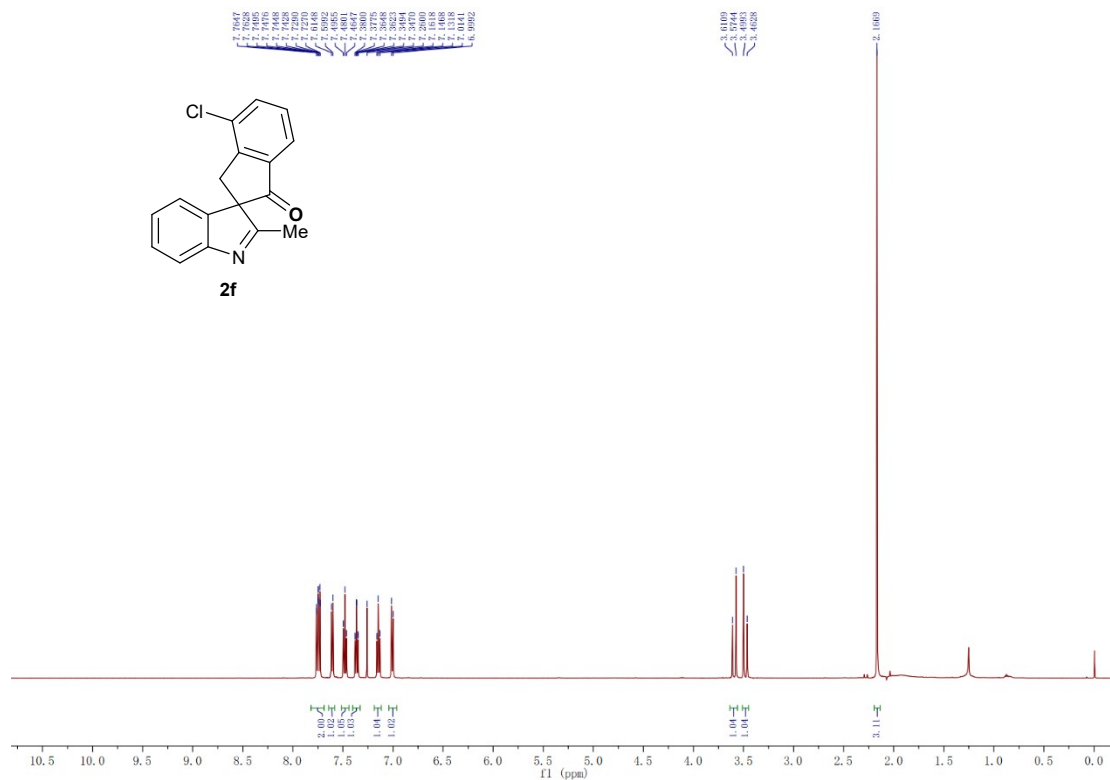

$^{13}\text{C}\{^1\text{H}\}$  NMR (125 MHz,  $\text{CDCl}_3$ )

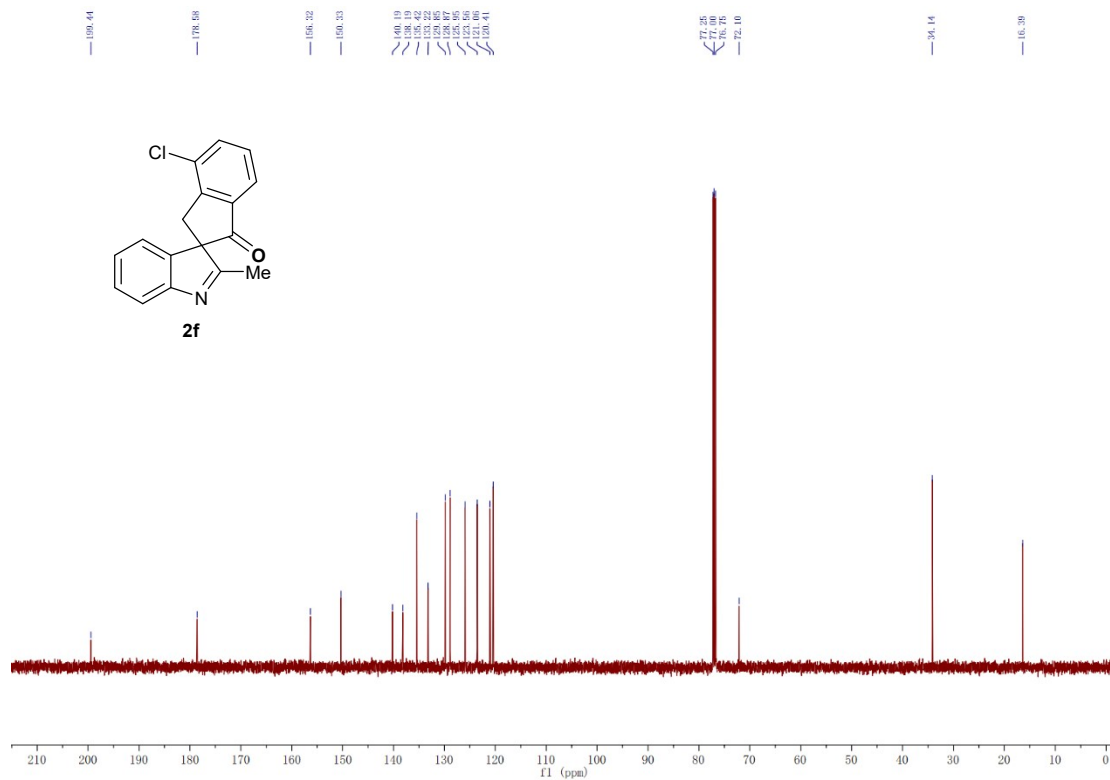



# 6-chloro-2'-methylspiro[indene-2,3'-indol]-1(3*H*)-one (2g)

$^1\text{H}$  NMR (500 MHz,  $\text{CDCl}_3$ )

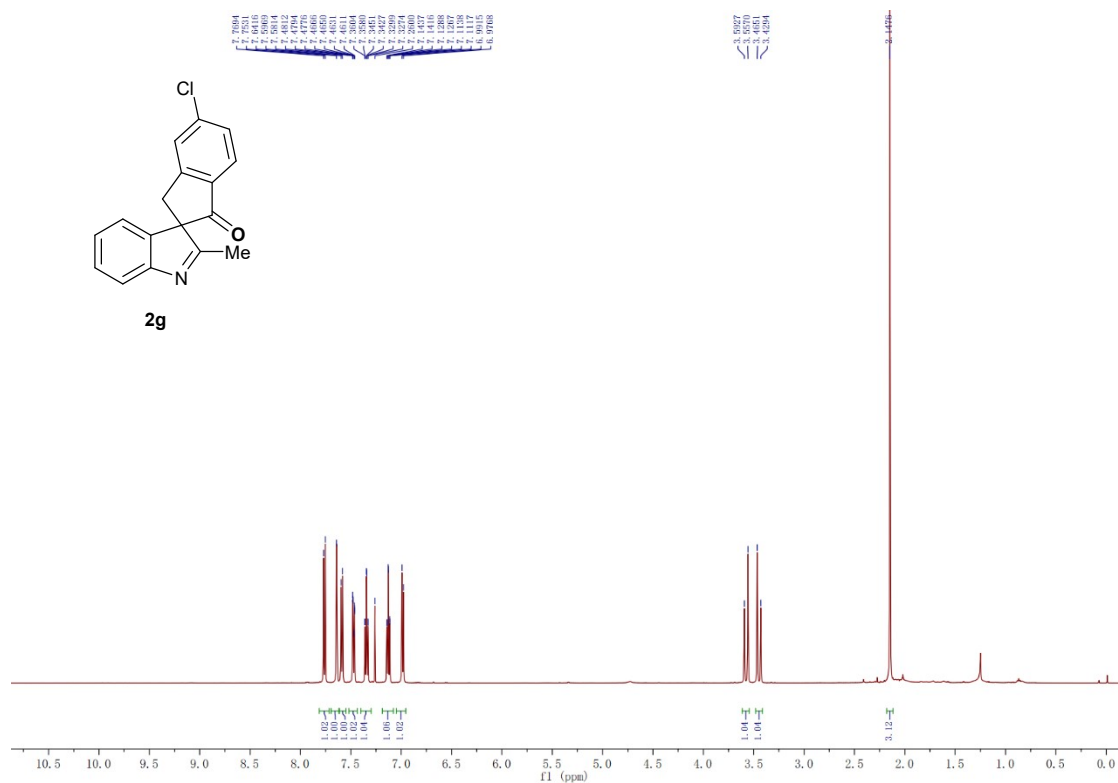

$^{13}\text{C}\{^1\text{H}\}$  NMR (125 MHz,  $\text{CDCl}_3$ )

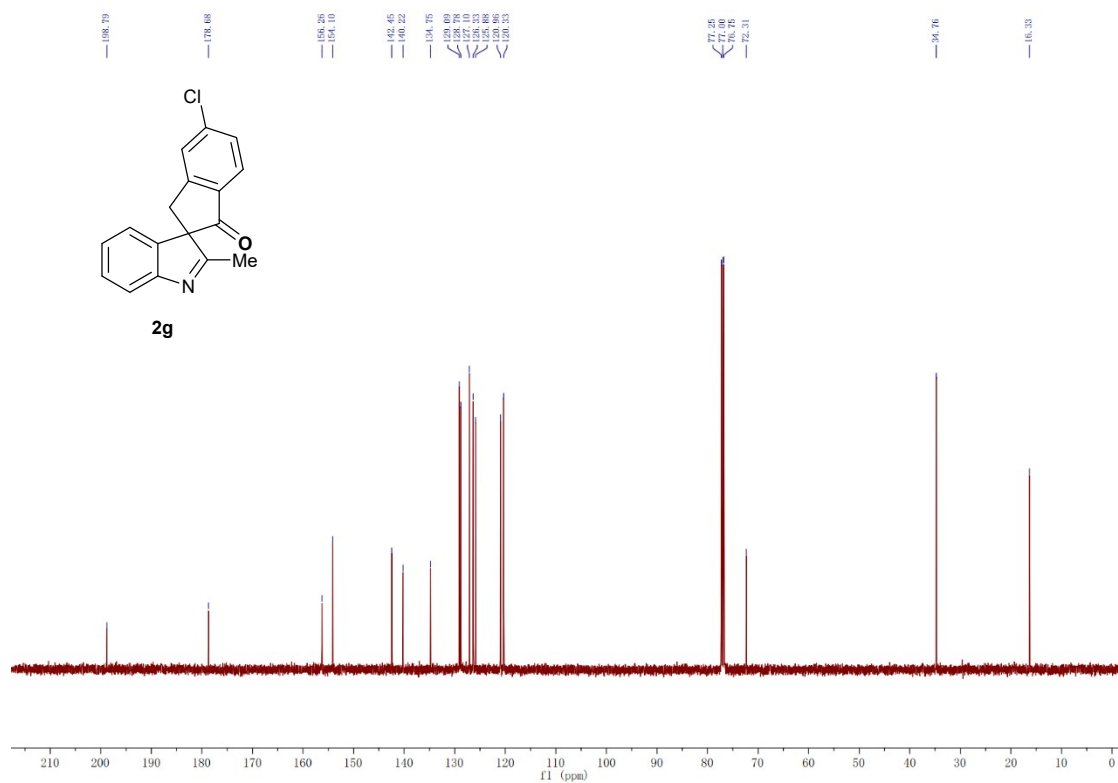

# 5-fluoro-2'-methylspiro[indene-2,3'-indol]-1(3H)-one (2h)

$^1\text{H}$  NMR (500 MHz,  $\text{CDCl}_3$ )

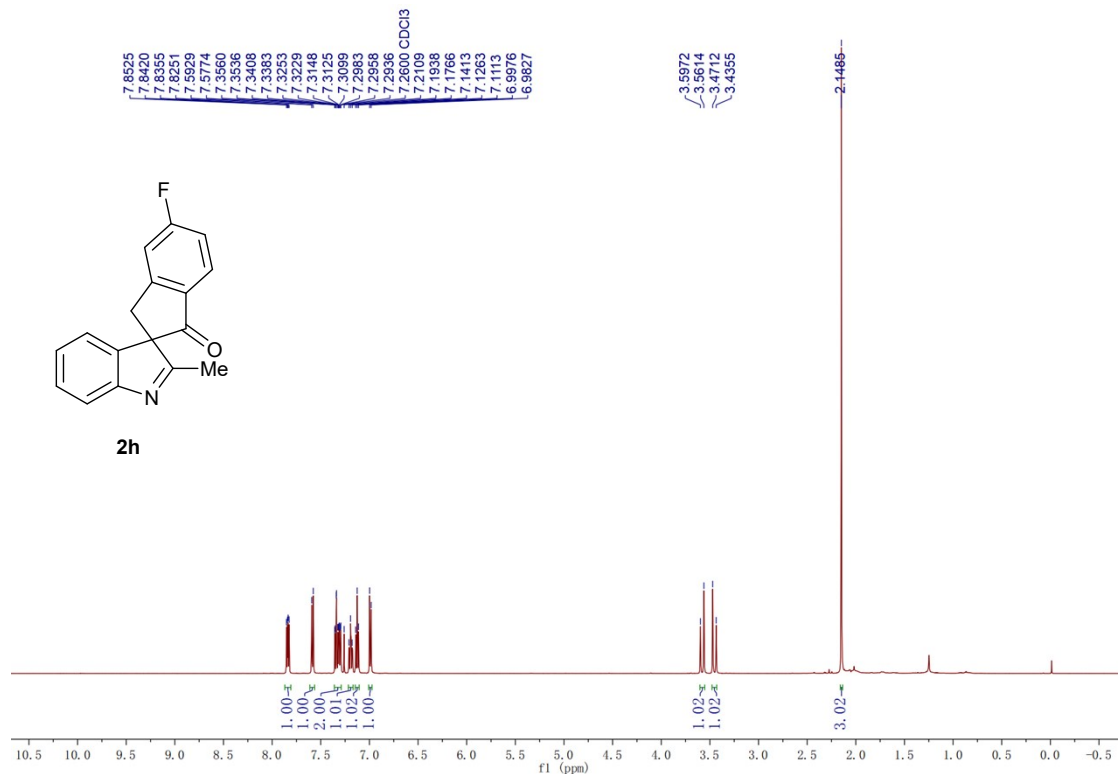

$^{13}\text{C}\{^1\text{H}\}$  NMR (125 MHz,  $\text{CDCl}_3$ )

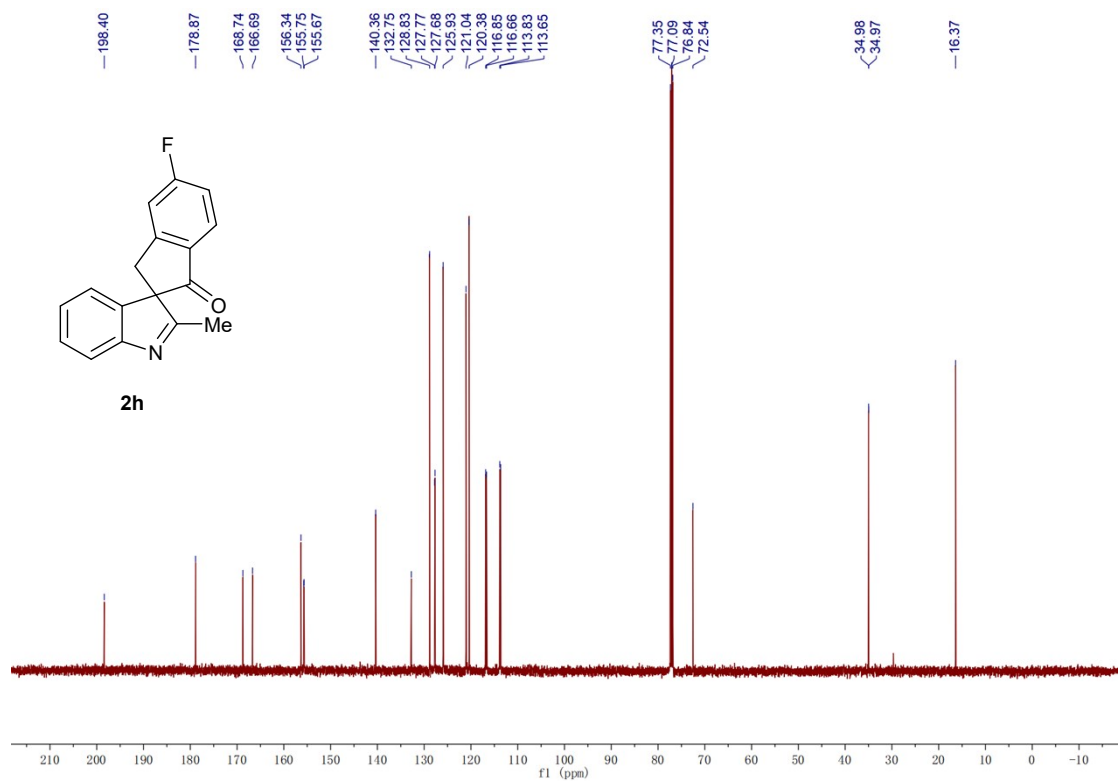

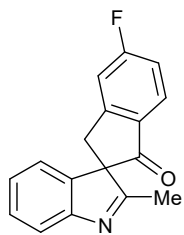

2h

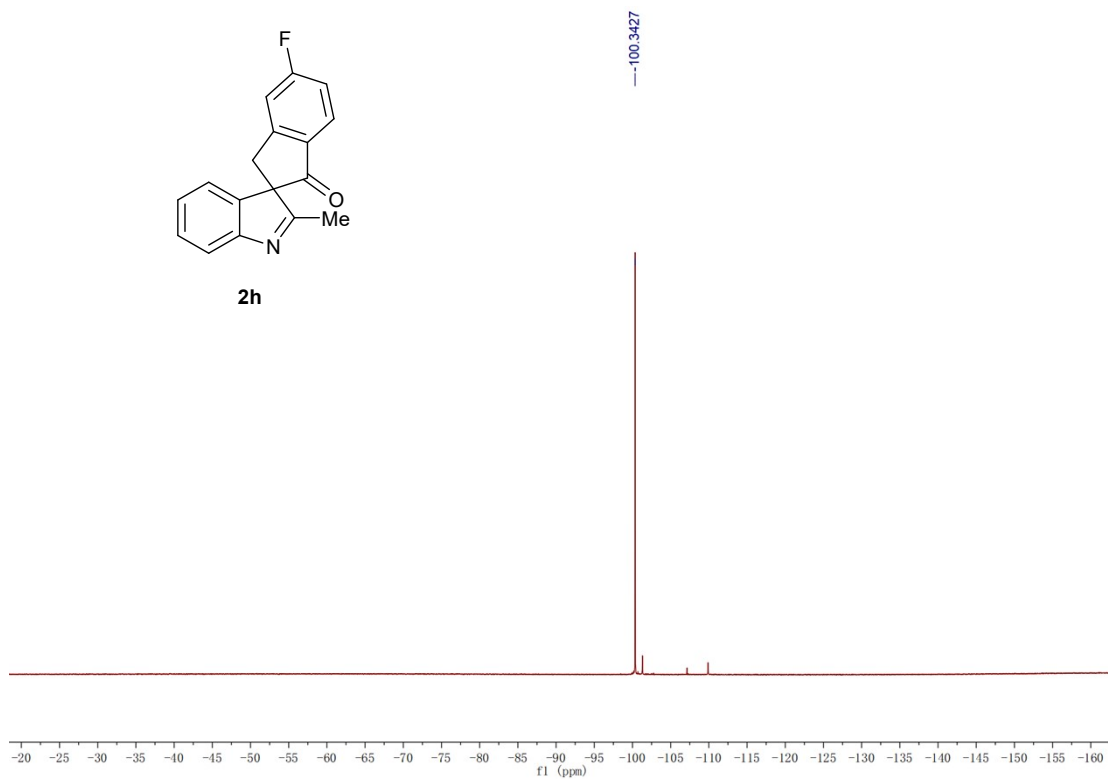

7-chloro-2'-methylspiro[indene-2,3'-indol]-1(3*H*)-one (**2i**)

$^1\text{H}$  NMR (500 MHz,  $\text{CDCl}_3$ )

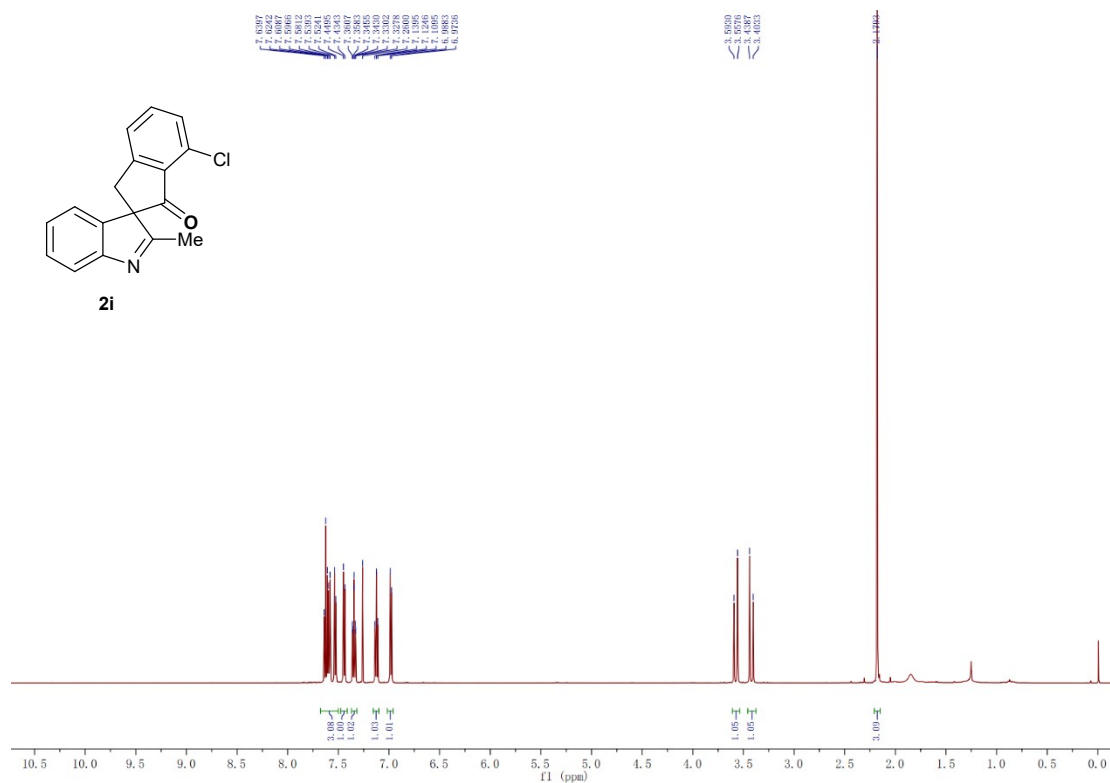

$^{13}\text{C}\{^1\text{H}\}$  NMR (125 MHz,  $\text{CDCl}_3$ )

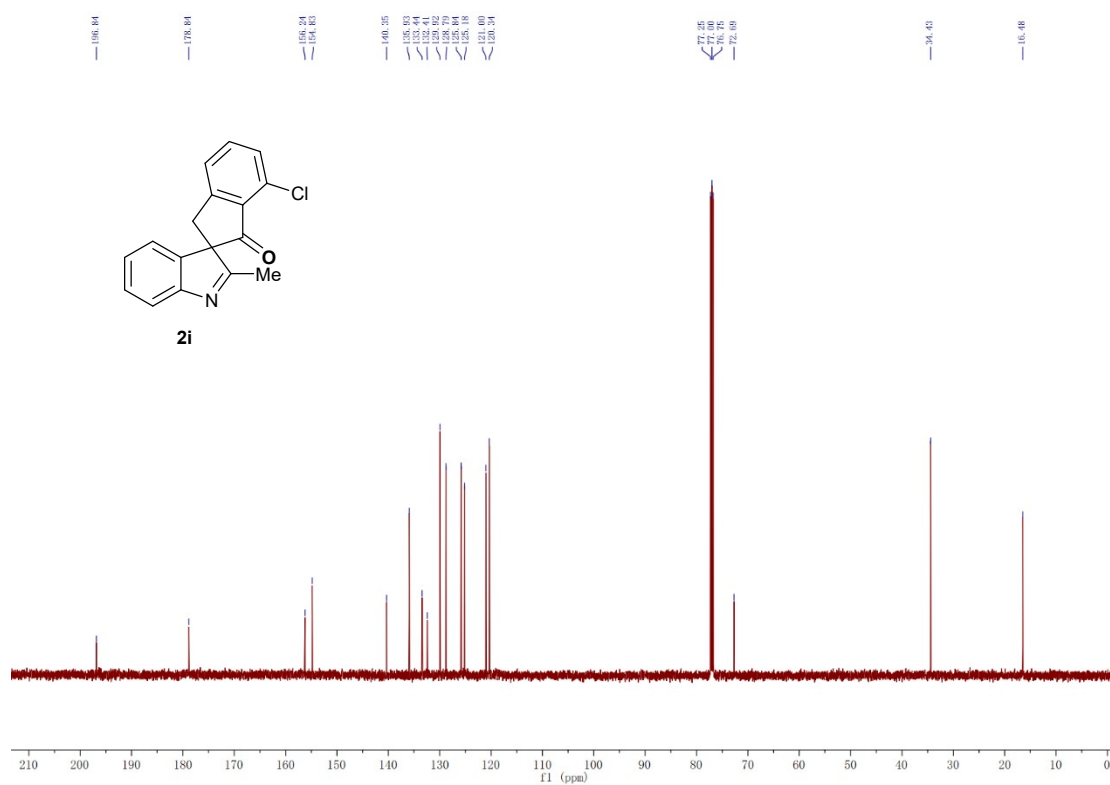

## 2'-methyl-5-nitrospiro[indene-2,3'-indol]-1(3H)-one (2j)

$^1\text{H}$  NMR (500 MHz,  $\text{CDCl}_3$ )

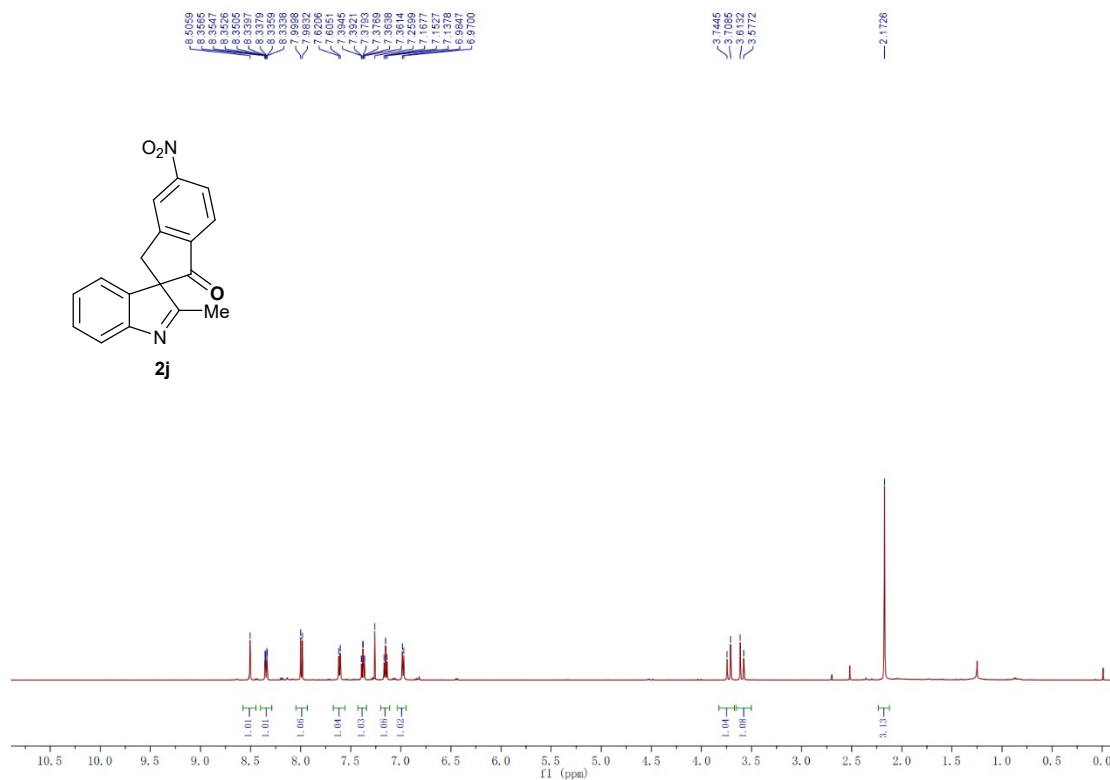

$^{13}\text{C}\{^1\text{H}\}$  NMR (125 MHz,  $\text{CDCl}_3$ )

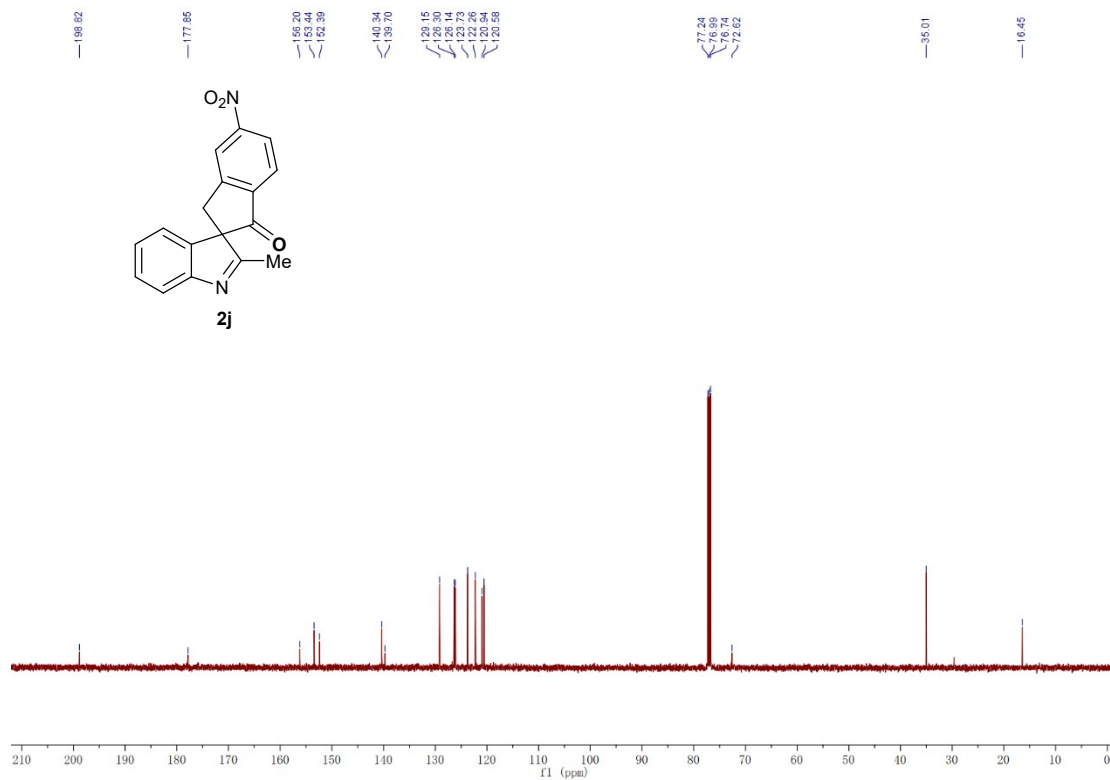

# 5,6-dimethoxy-2'-methylspiro[indene-2,3'-indol]-1(3H)-one (2k)

$^1\text{H}$  NMR (500 MHz,  $\text{CDCl}_3$ )

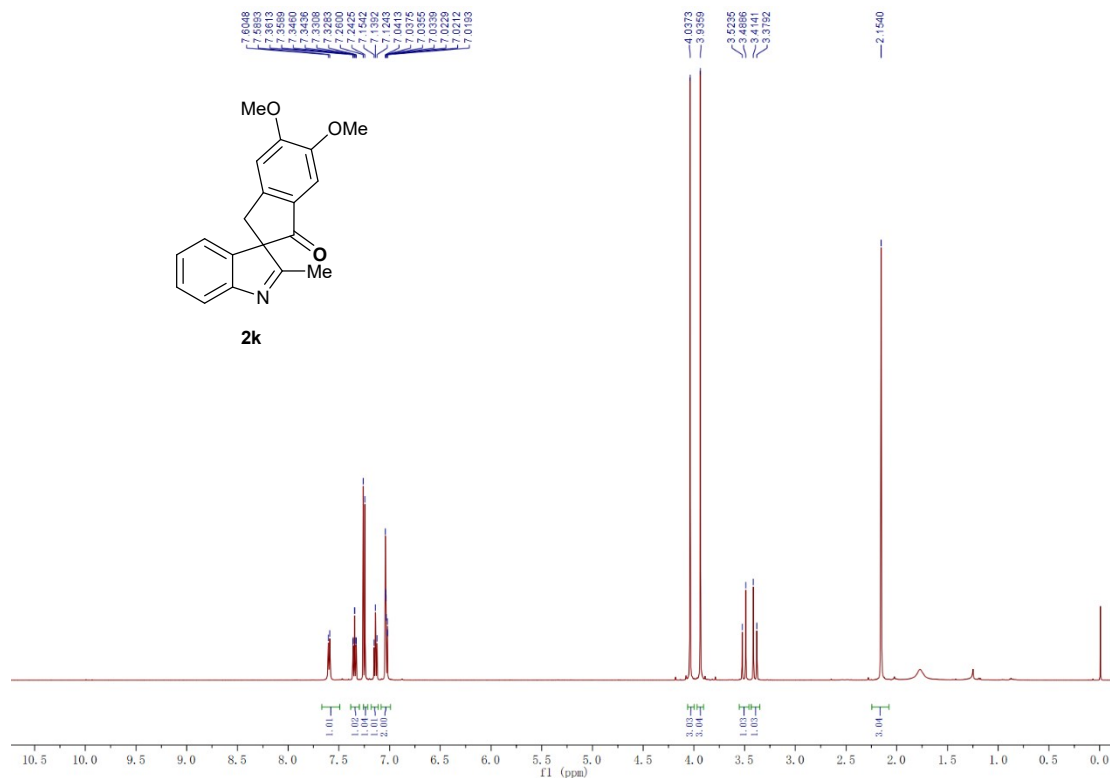

$^{13}\text{C}\{^1\text{H}\}$  NMR (125 MHz,  $\text{CDCl}_3$ )

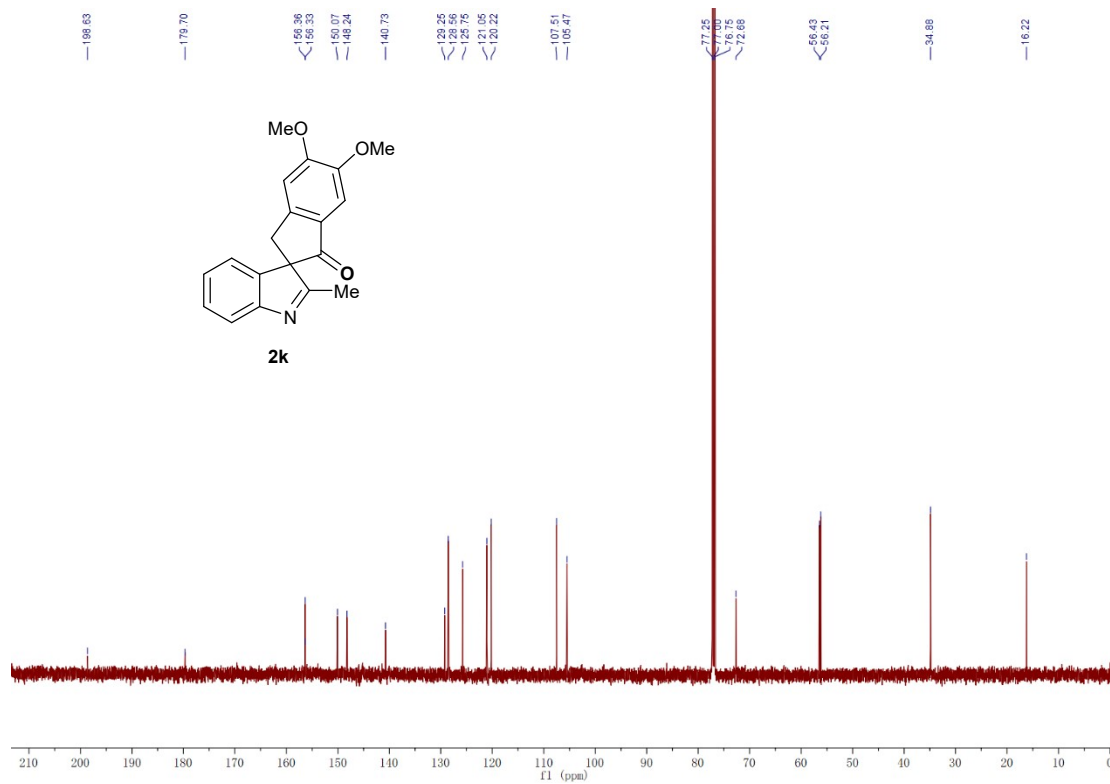

## 2'-methylspiro[cyclopenta[a]naphthalene-2,3'-indol]-1(3H)-one (21)

<sup>1</sup>H NMR (500 MHz, CDCl<sub>3</sub>)

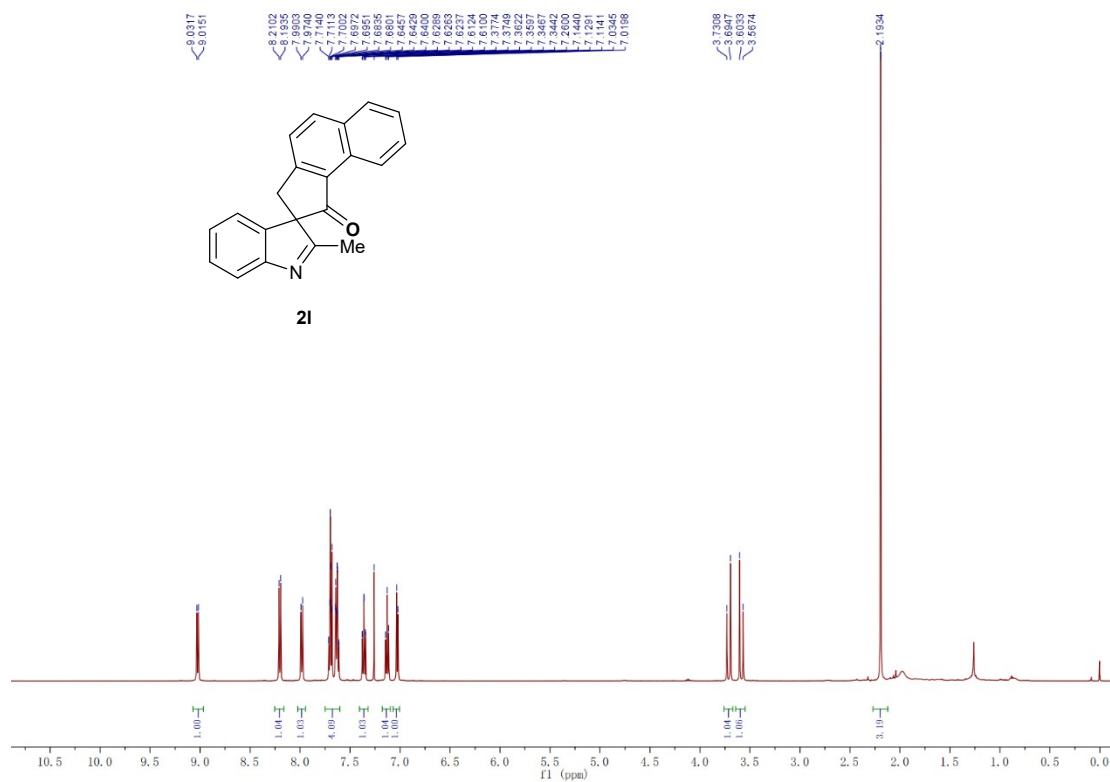

<sup>13</sup>C {<sup>1</sup>H} NMR (125 MHz, CDCl<sub>3</sub>)

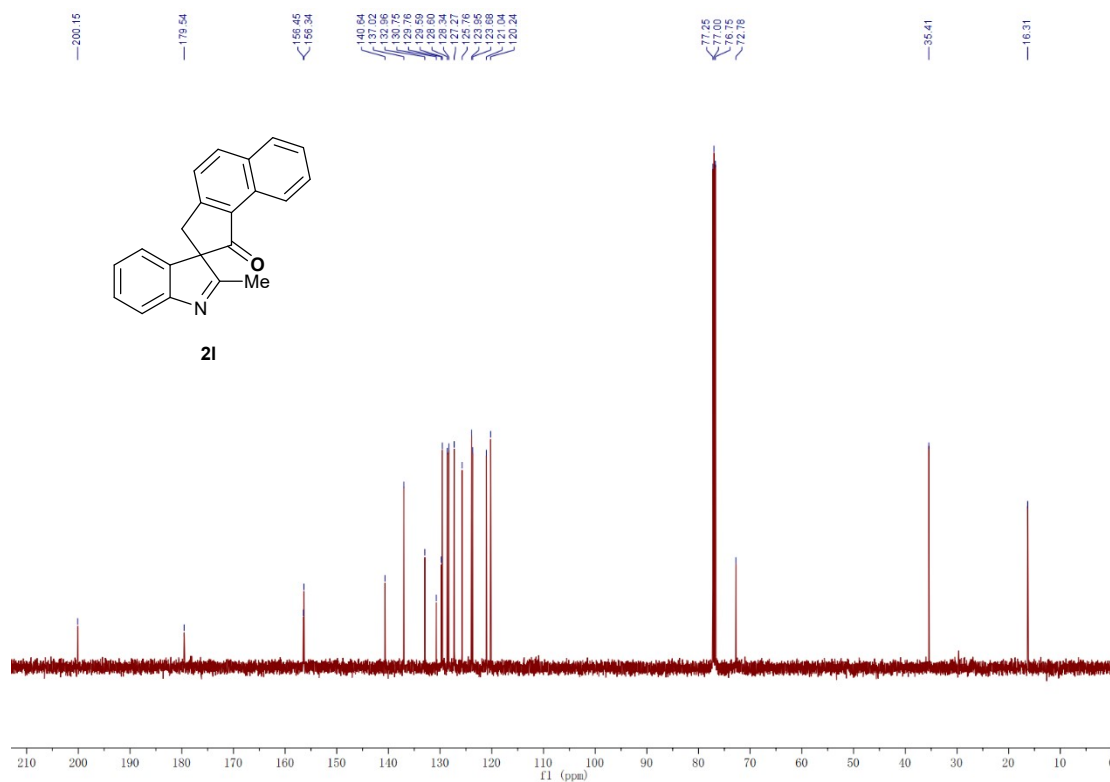

## 2',5'-dimethylspiro[indene-2,3'-indol]-1(3H)-one (2m)

$^1\text{H}$  NMR (500 MHz,  $\text{CDCl}_3$ )

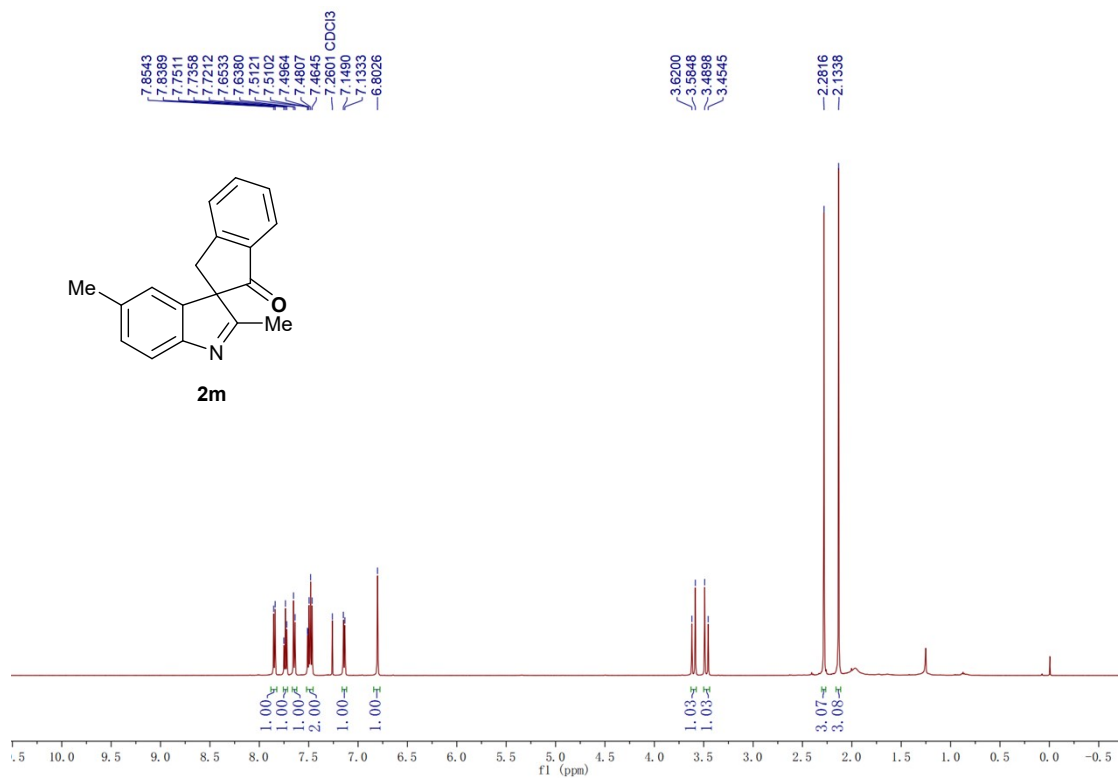

$^{13}\text{C}\{^1\text{H}\}$  NMR (125 MHz,  $\text{CDCl}_3$ )

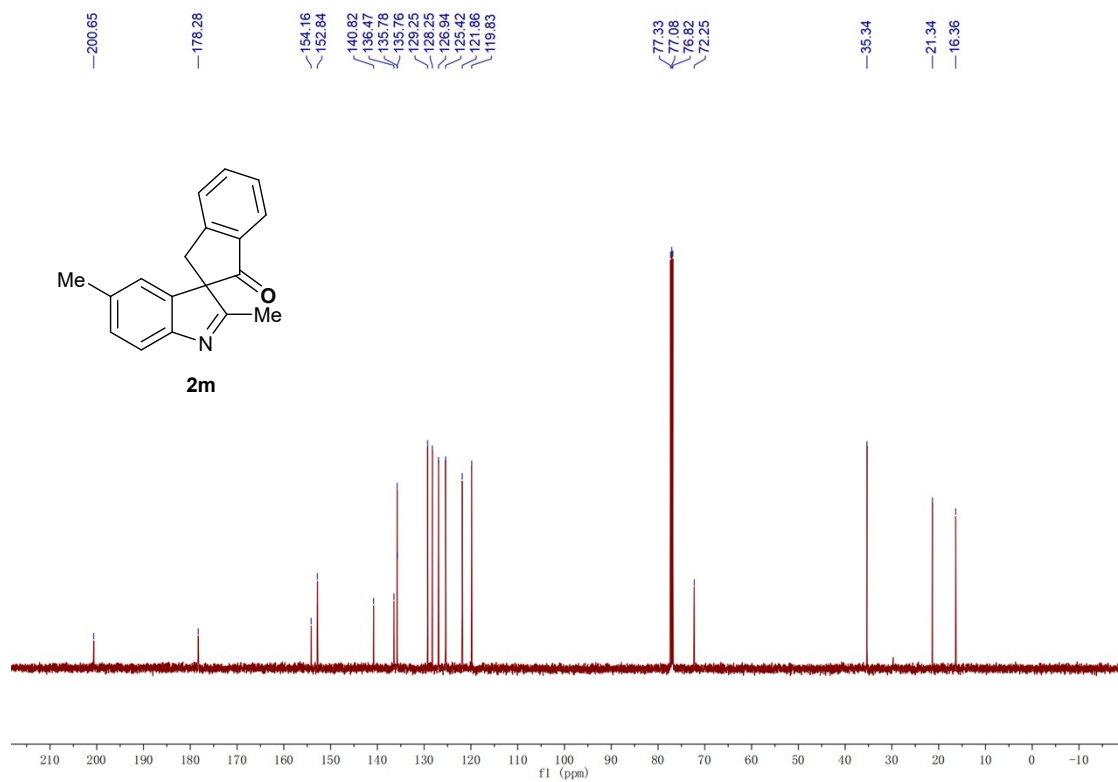



### 5'-methoxy-2'-methylspiro[indene-2,3'-indol]-1(3H)-one (2n)

$^1\text{H}$  NMR (500 MHz,  $\text{CDCl}_3$ )

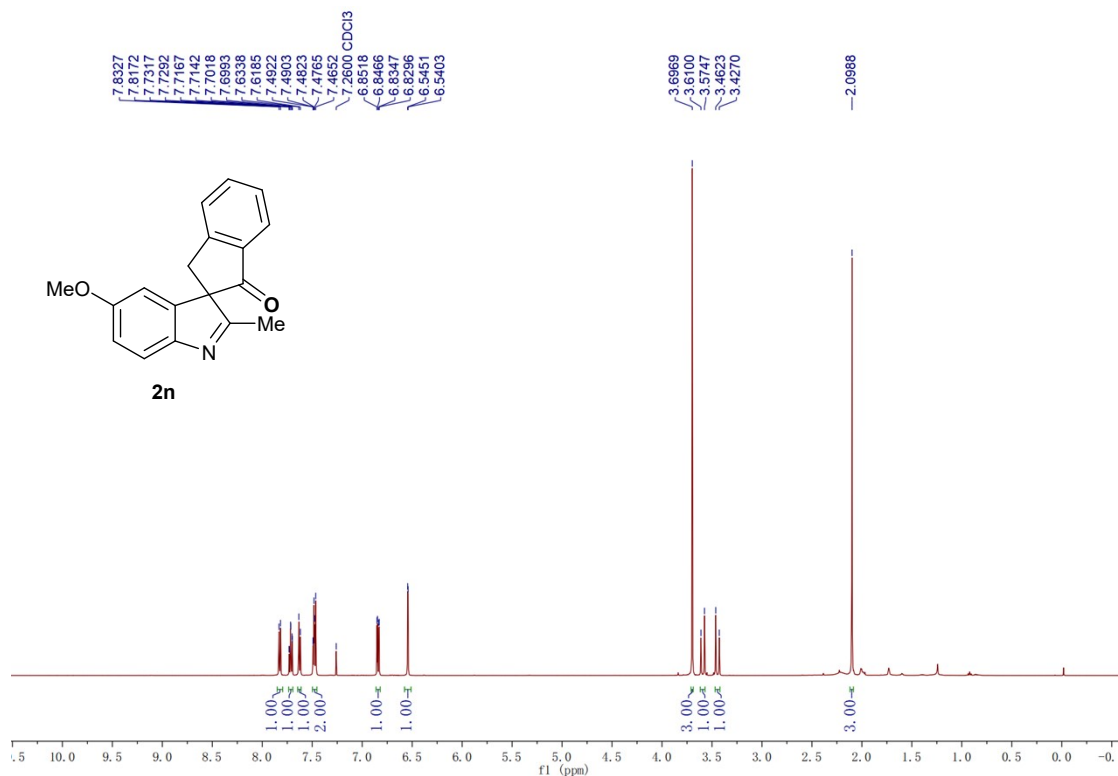

$^{13}\text{C}\{^1\text{H}\}$  NMR (125 MHz,  $\text{CDCl}_3$ )

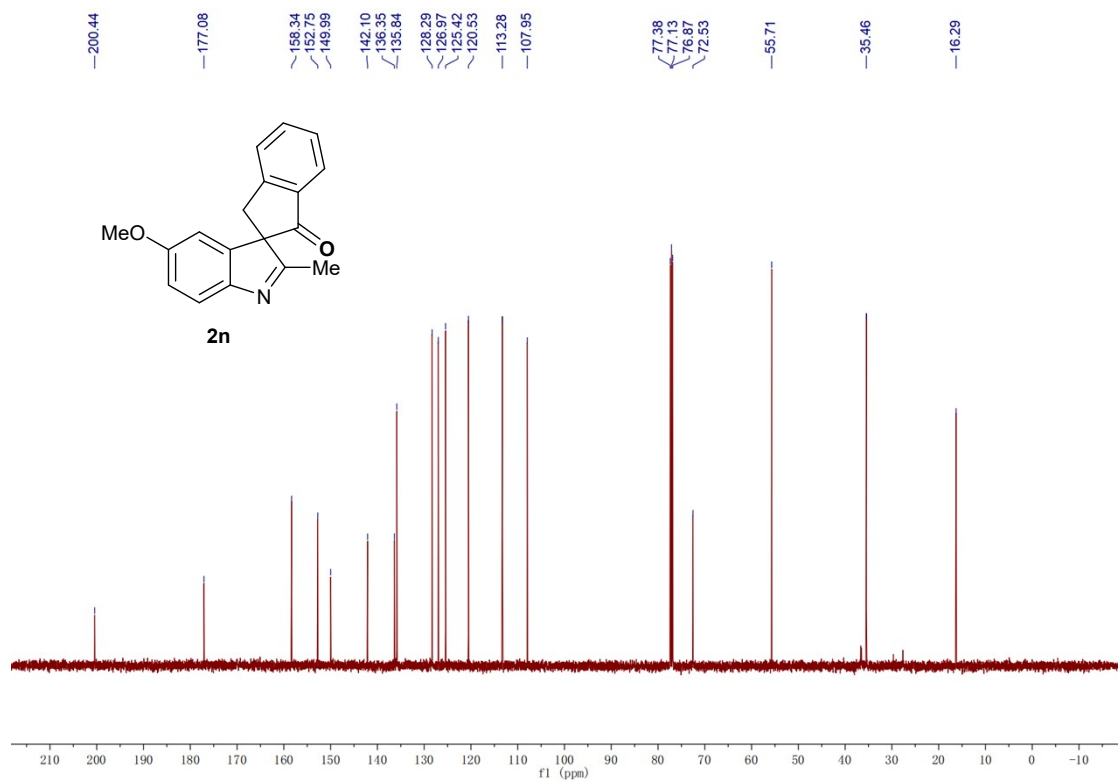

# 5'-fluoro-2'-methylspiro[indene-2,3'-indol]-1(3H)-one (2o)

$^1\text{H}$  NMR (500 MHz,  $\text{CDCl}_3$ )

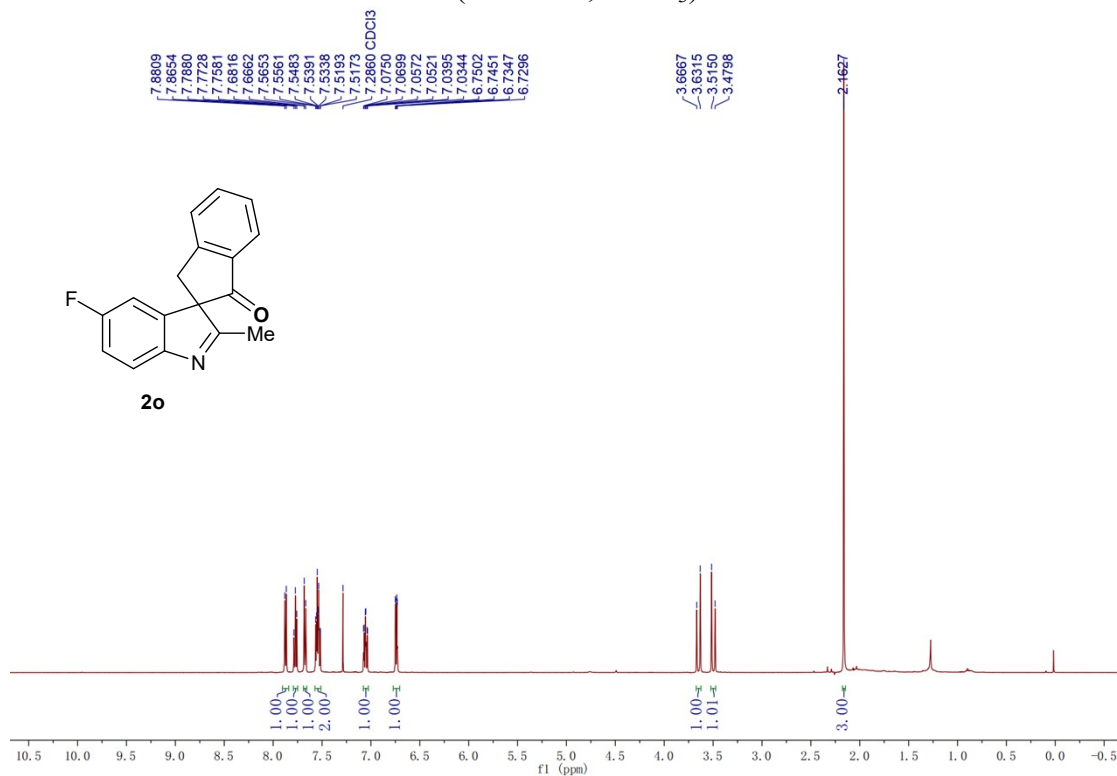

$^{13}\text{C}\{^1\text{H}\}$  NMR (125 MHz,  $\text{CDCl}_3$ )

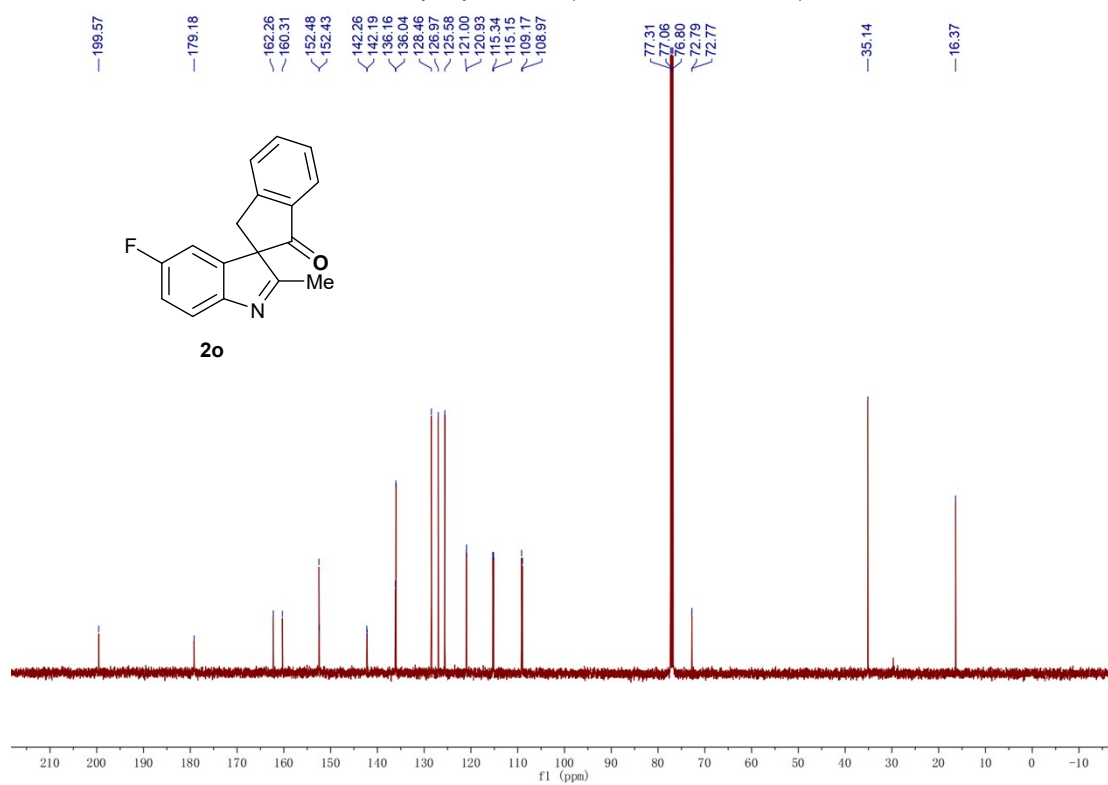

$^{19}\text{F}$  NMR (471 MHz,  $\text{CDCl}_3$ )

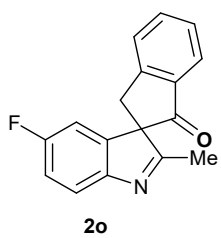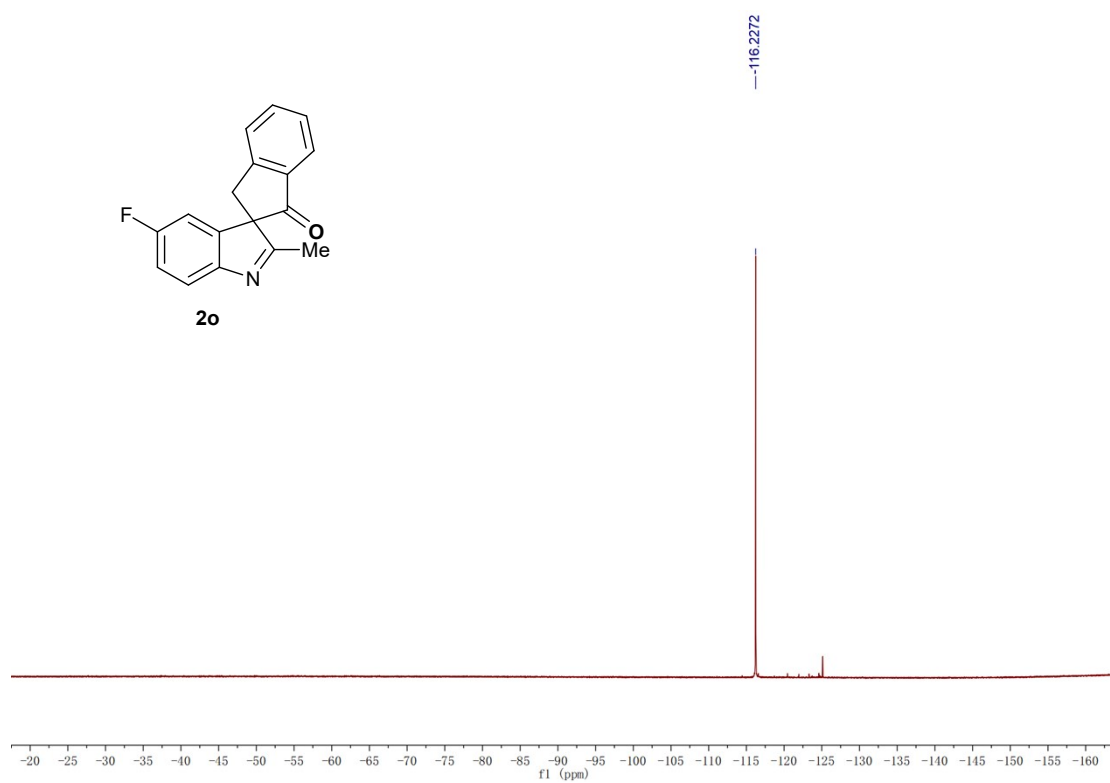

# 5'-chloro-2'-methylspiro[indene-2,3'-indol]-1(3H)-one (2p)

$^1\text{H}$  NMR (500 MHz,  $\text{CDCl}_3$ )

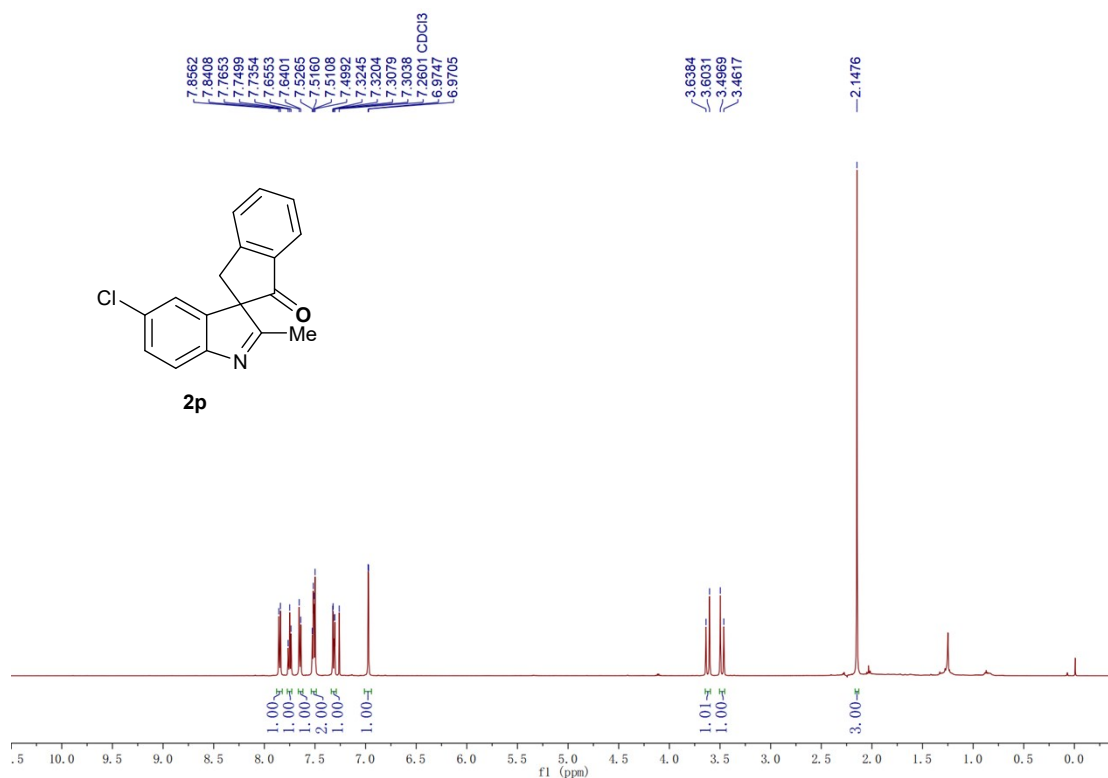

$^{13}\text{C}\{^1\text{H}\}$  NMR (125 MHz,  $\text{CDCl}_3$ )

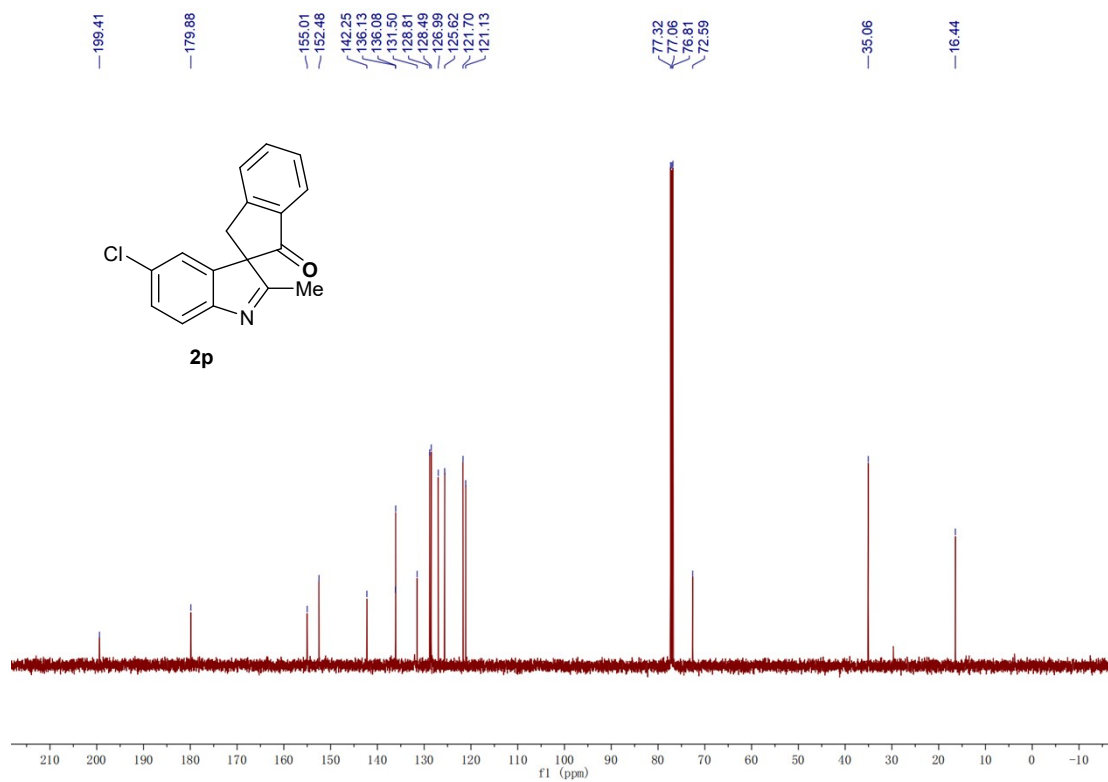

## 2'-phenylspiro[indene-2,3'-indol]-1(3H)-one (2q)

$^1\text{H NMR}$  (500 MHz,  $\text{CDCl}_3$ )

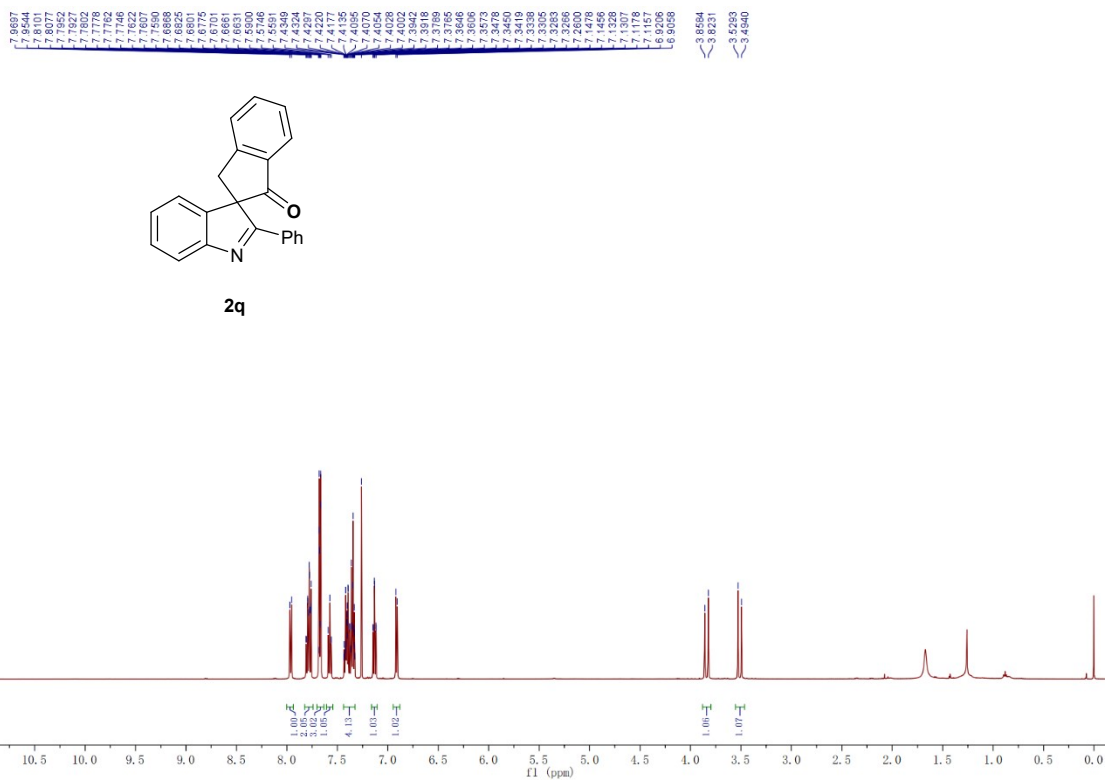

$^{13}\text{C}\{^1\text{H}\}$  NMR (125 MHz,  $\text{CDCl}_3$ )

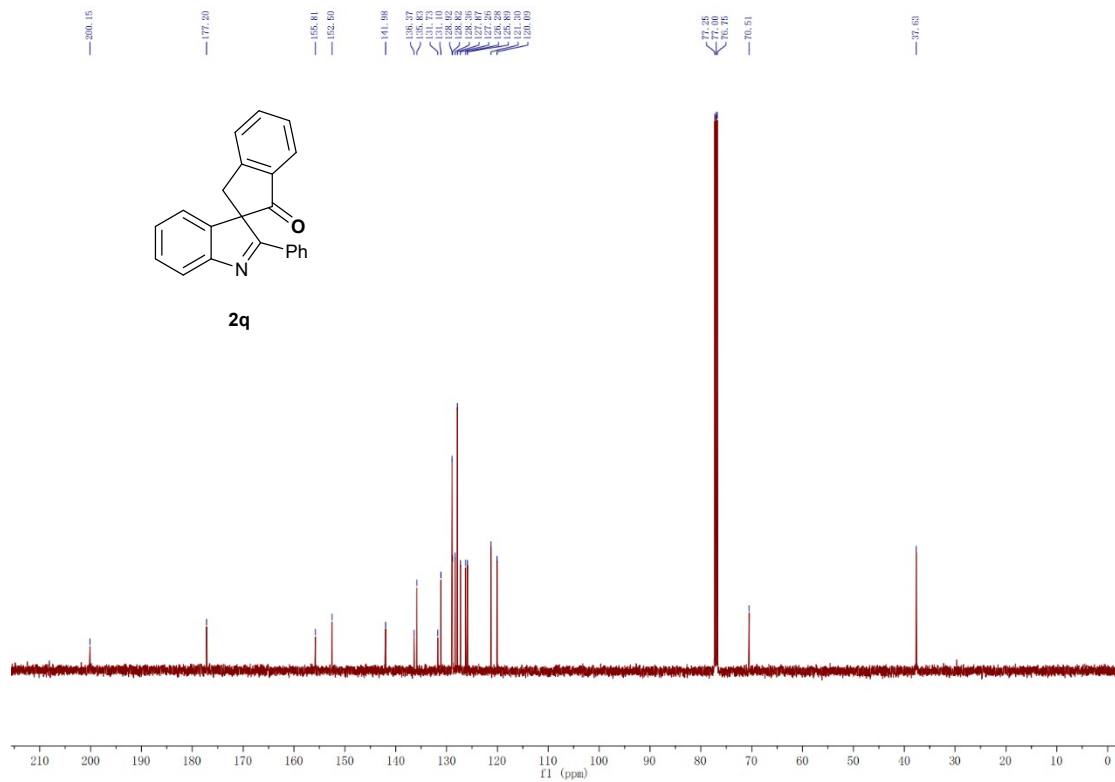

## 2'-(4-fluorophenyl)spiro[indene-2,3'-indol]-1(3H)-one (2r)

<sup>1</sup>H NMR (500 MHz, CDCl<sub>3</sub>)

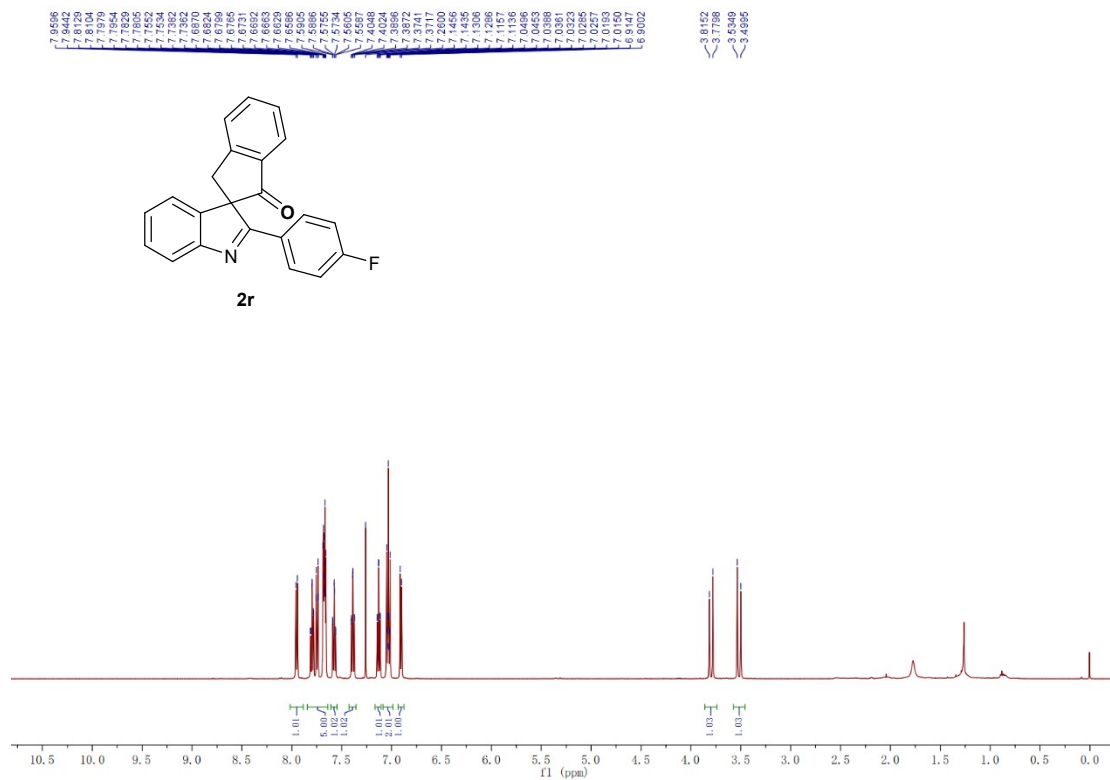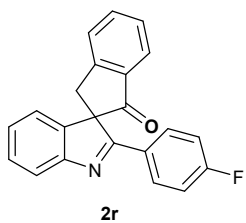

<sup>13</sup>C{<sup>1</sup>H} NMR (125 MHz, CDCl<sub>3</sub>)

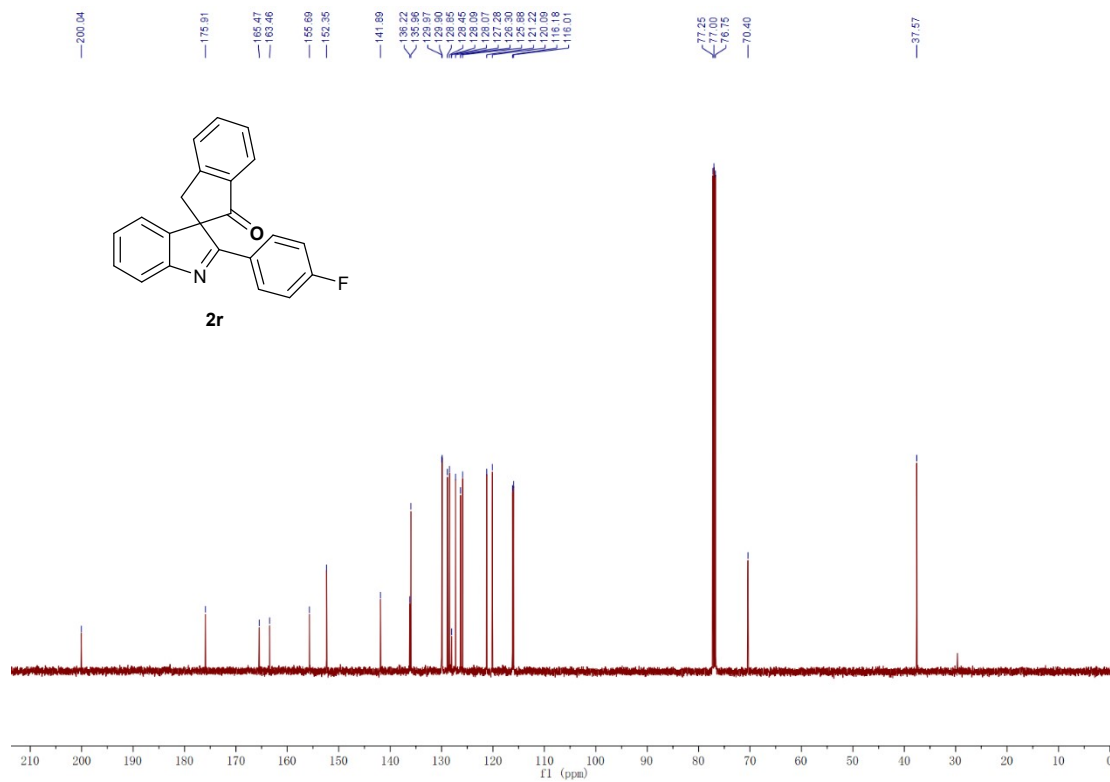

# 2'-methyl-4*H*,6*H*-spiro[cyclopenta[*c*]thiophene-5,3'-indol]-4-one (2t)

<sup>1</sup>H NMR (500 MHz, CDCl<sub>3</sub>)

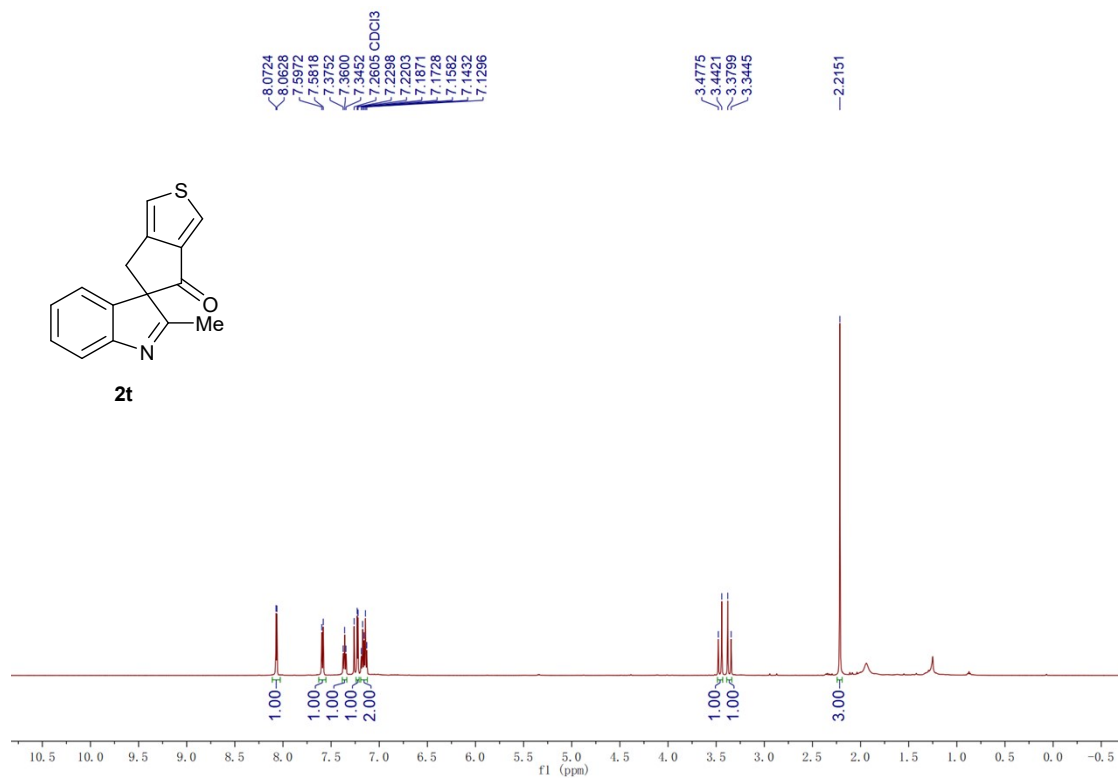

<sup>13</sup>C{<sup>1</sup>H} NMR (125 MHz, CDCl<sub>3</sub>)

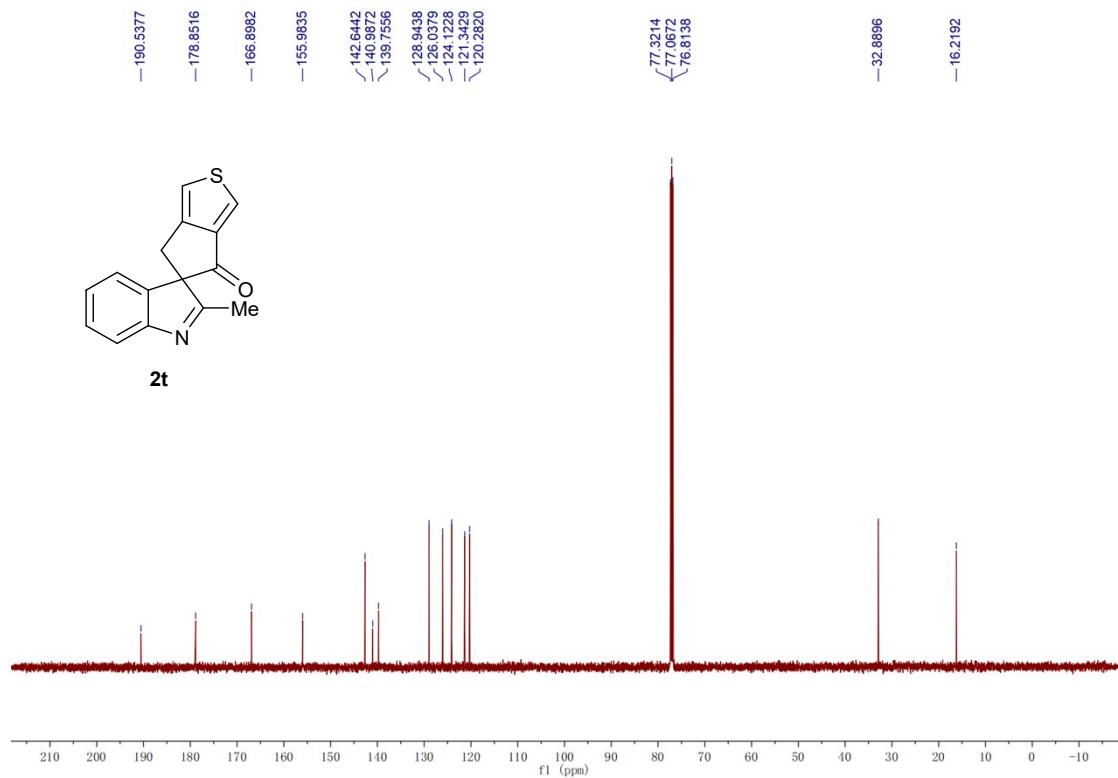

## 2'-phenylspiro[indene-2,3'-indole]-1(3H)-thione (3)

$^1\text{H}$  NMR (500 MHz,  $\text{CDCl}_3$ )

8.8072, 8.7907, 8.1188, 8.1034, 7.8051, 7.8022, 7.7906, 7.7881, 7.7858, 7.7778, 7.7710, 7.7579, 7.7428, 7.7306, 7.4274, 7.4229, 7.4164, 7.4132, 7.4027, 7.3998, 7.3878, 7.3849, 7.3730, 7.3701, 7.3289, 7.3137, 7.2987, 7.2814, 7.2896, 7.2753, 7.2157, 7.2136, 7.2106, 7.2071, 7.2012, 7.1870, 7.1830, 7.1842, 7.1812, 7.1765, 7.1667, 7.1639, 7.1611, 7.1544, 7.1498, 7.1440, 7.1376, 7.1351, 7.1324, 3.8458, 3.8141, 3.4733, 3.4418

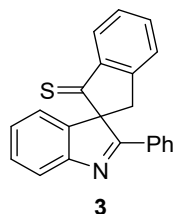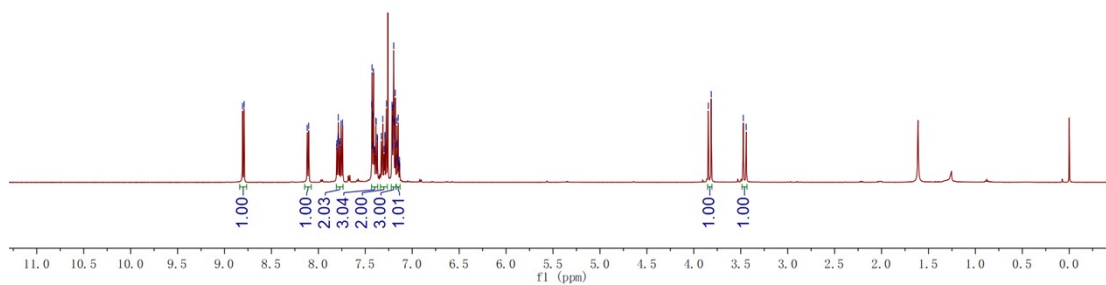

$^{13}\text{C}\{^1\text{H}\}$  NMR (125 MHz,  $\text{CDCl}_3$ )

197.51, 162.36, 151.75, 137.71, 136.08, 135.77, 133.05, 129.73, 128.87, 128.60, 128.32, 128.29, 127.74, 125.46, 125.07, 124.96, 122.77, 117.86, 77.29, 77.04, 76.79, 71.92, 35.78

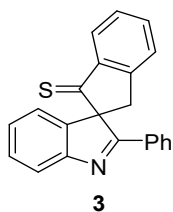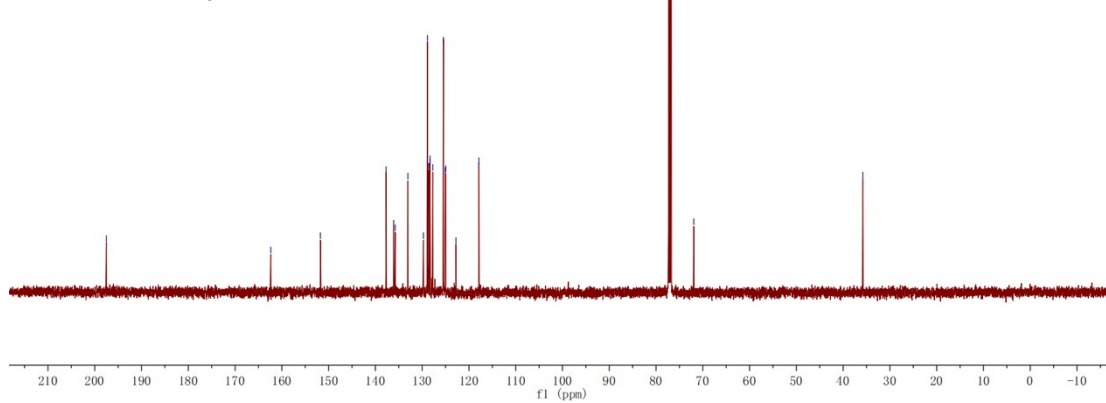



## 2'-(2-bromophenyl)spiro[indene-2,3'-indol]-1(3H)-one (4)

$^1\text{H}$  NMR (500 MHz,  $\text{CDCl}_3$ )

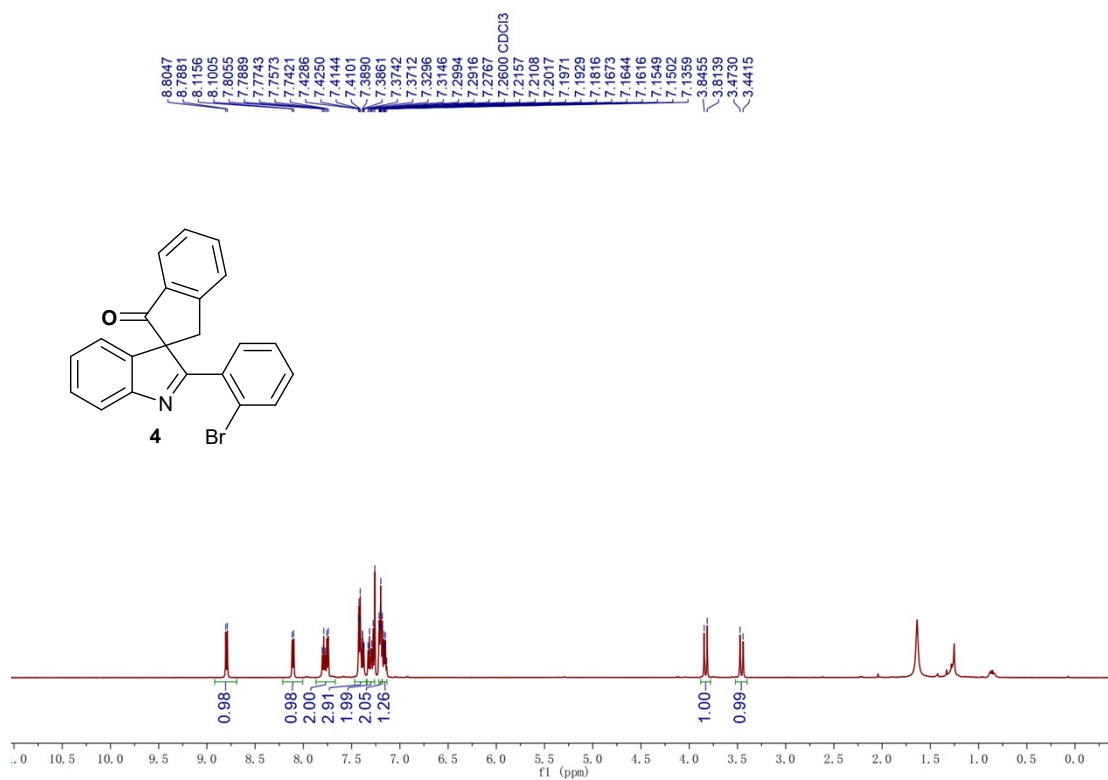

$^{13}\text{C}\{^1\text{H}\}$  NMR (125 MHz,  $\text{CDCl}_3$ )

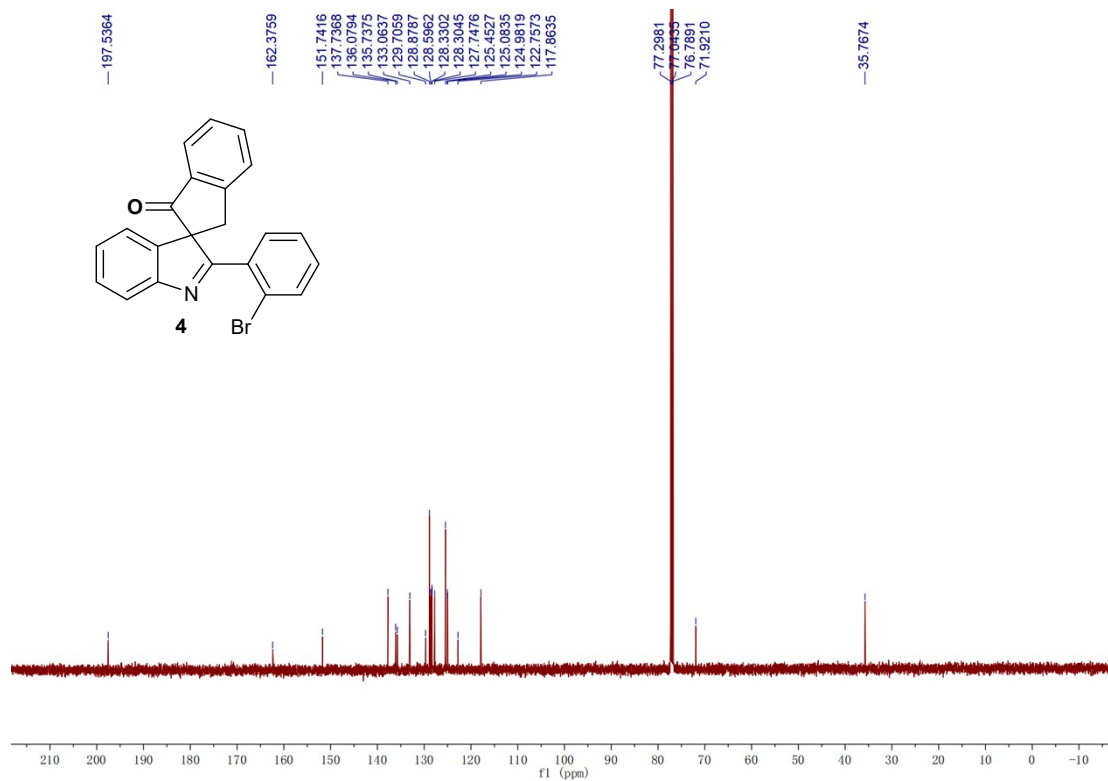

**4-methyl-N'-(2'-methylspiro[indene-2,3'-indol]-1(3*H*)-ylidene)benzenesulfonohydrazide (5)**

<sup>1</sup>H NMR (500 MHz, CDCl<sub>3</sub>)

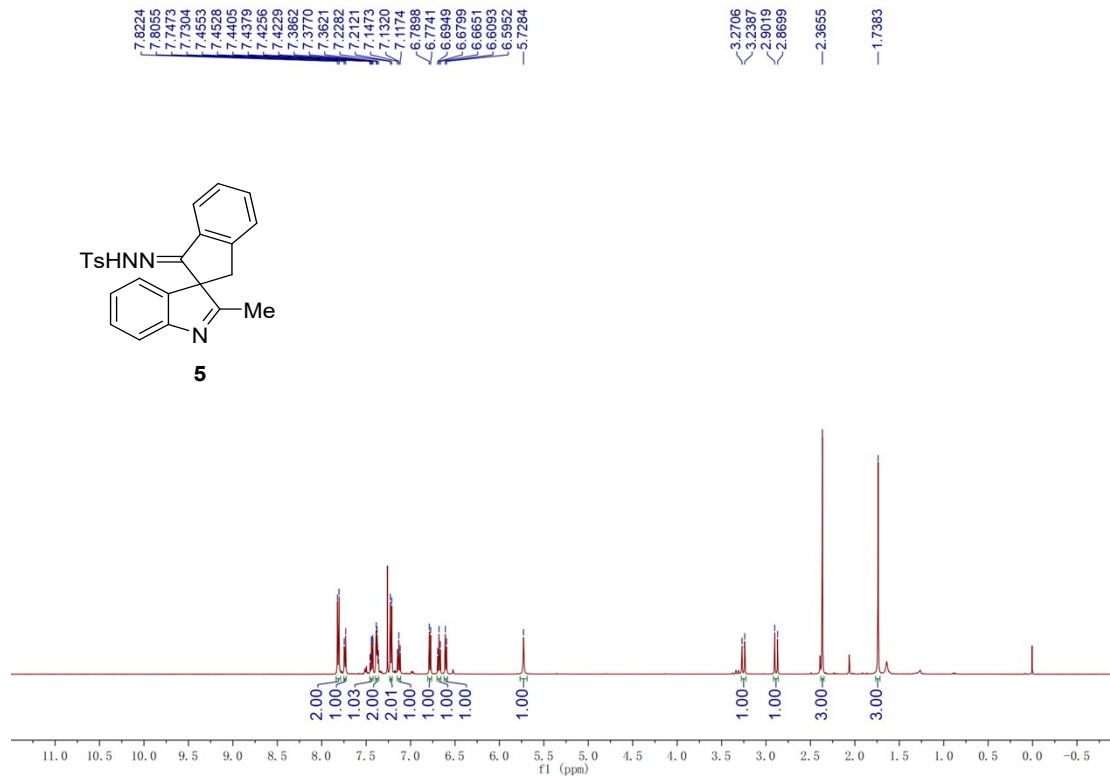

<sup>13</sup>C {<sup>1</sup>H} NMR (125 MHz, CDCl<sub>3</sub>)

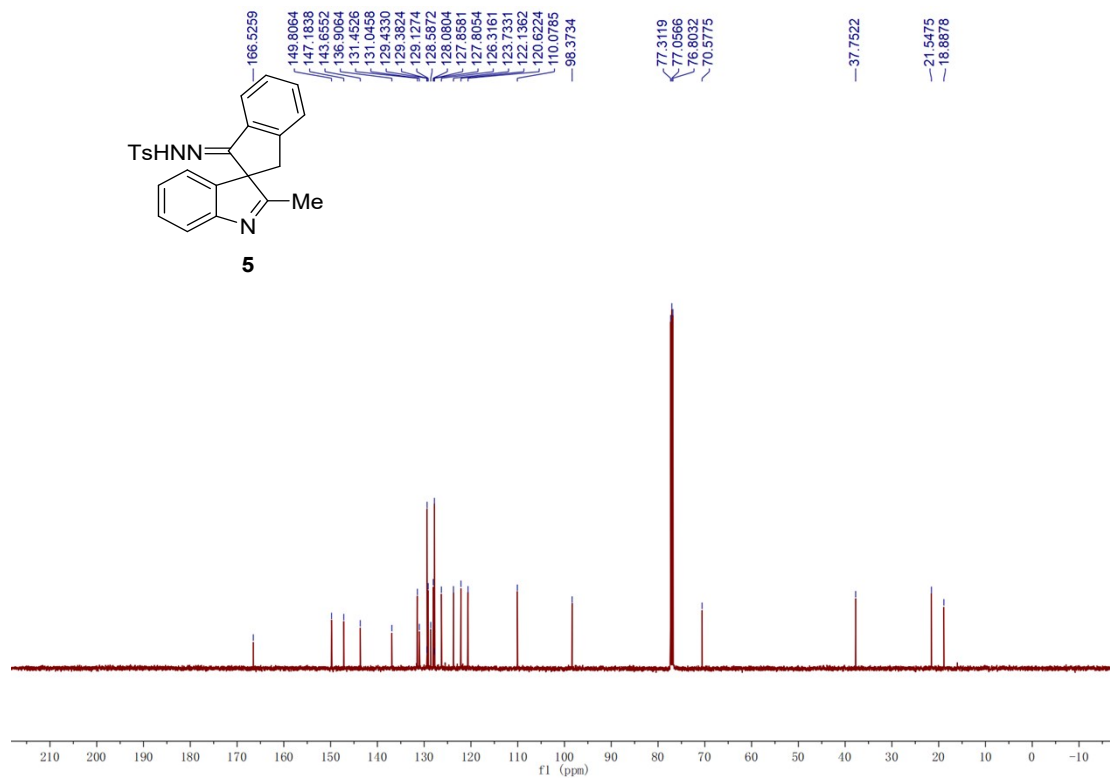

## 2'-methylspiro[indene-2,3'-indolin]-1(3*H*)-one (6)

<sup>1</sup>H NMR (500 MHz, CDCl<sub>3</sub>)

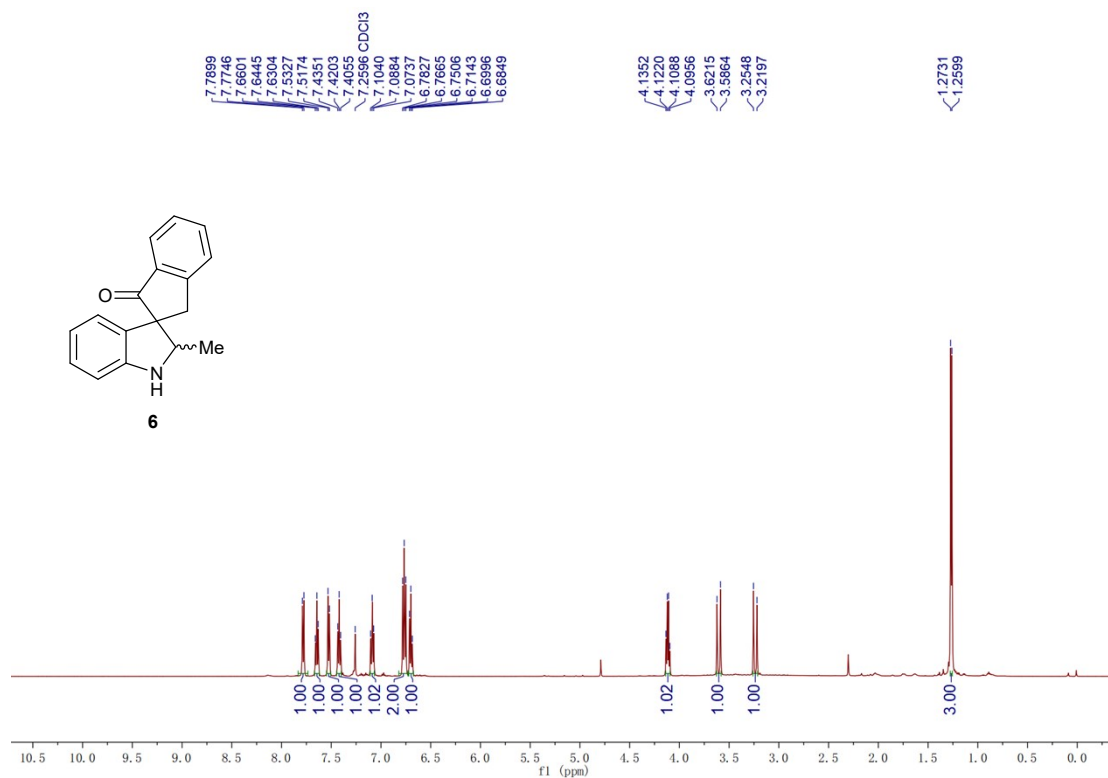

<sup>13</sup>C{<sup>1</sup>H} NMR (125 MHz, CDCl<sub>3</sub>)

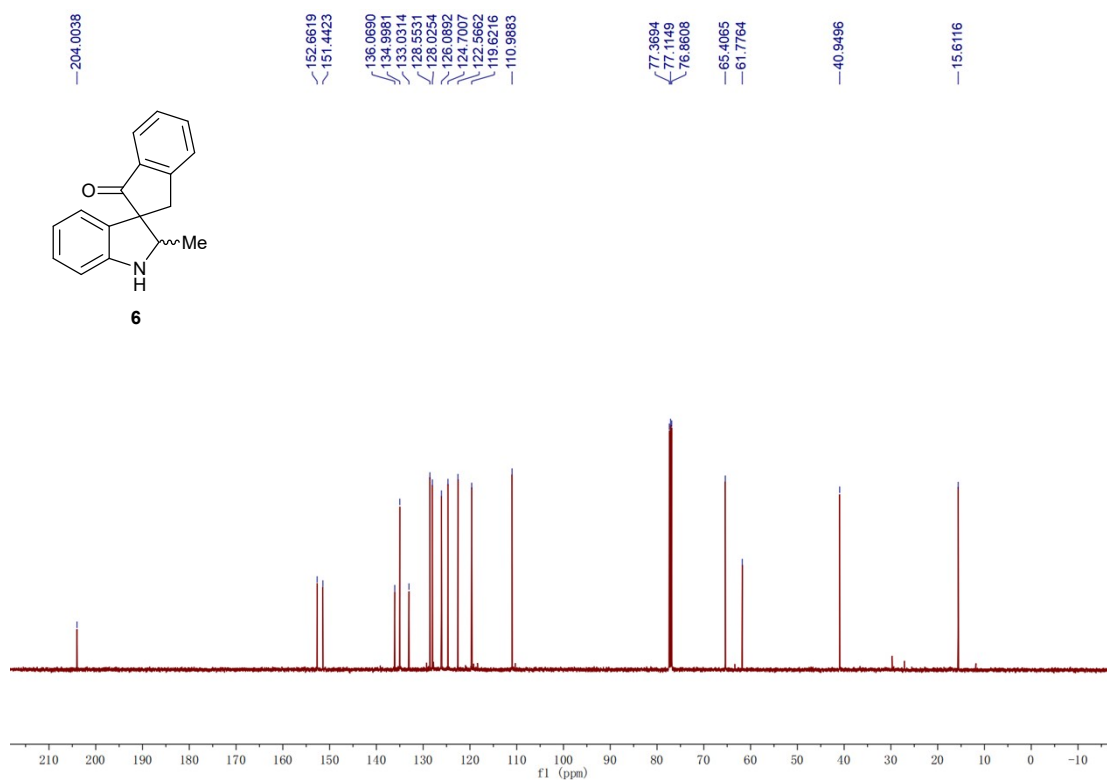

Supplement: d3qo01014g1.pdf [file d3qo01014g1.pdf]
